# Supplementary material for: Gene-encoding DNA origami for mammalian cell expression
Source: PubMed Central journal article supplement (PMC9950468; doi:10.1038/s41467-023-36601-1), 2023-02-23
Supplement: 41467_2023_36601_MOESM1_ESM.pdf [file 41467_2023_36601_MOESM1_ESM.pdf]

# Gene-encoding DNA origami for mammalian cell expression

Jessica A. Kretzmann<sup>1,2</sup>, Anna Liedl<sup>1,2</sup>, Alba Monferrer<sup>1,2</sup>, Volodymyr Mykhailiuk<sup>1,2</sup>, Samuel Beerkens<sup>1,2</sup>, and Hendrik Dietz<sup>1,2,\*</sup>

<sup>1</sup> Department of Biosciences, School of Natural Sciences, Technical University of Munich, Am Coulombwall 4a, 85748 Garching, Germany.

<sup>2</sup> Munich Institute of Biomedical Engineering, Technical University of Munich, Boltzmannstraße 11, 85748 Garching, Germany.

## Contents

|                                                       |    |
|-------------------------------------------------------|----|
| 1. Materials and Methods .....                        | 2  |
| 1.1 Scaffold cloning.....                             | 2  |
| 1.2 Scaffold production .....                         | 3  |
| 1.3 DNA origami folding .....                         | 3  |
| 2. Supplemental Data.....                             | 5  |
| 2.1 Characterisation and supporting information ..... | 5  |
| 2.2 Scaffold sequences and origami design .....       | 16 |
| 2.2.1 sc_EGFP1 .....                                  | 16 |
| 2.2.1.1 sc_EGFP1 20HB-ext and 20HB-ext-W.....         | 17 |
| 2.2.1.2 sc_EGFP1 20HB-int and 20HB-int-W.....         | 20 |
| 2.2.1.3 sc_EGFP1 32HB .....                           | 24 |
| 2.2.1.4 sc_EGFP1 12HB .....                           | 26 |
| 2.2.1.5 sc_EGFP1 20HB-LS.....                         | 28 |
| 2.2.1.6 sc_EGFP1 20HB-LP.....                         | 30 |
| 2.2.1.7 sc_EGFP1 20HB-LPv2.....                       | 32 |
| 2.2.1.8 sc_EGFP1 20HB-Circ.....                       | 34 |
| 2.2.2 sc_EGFP2.....                                   | 36 |
| 2.2.2.1 sc_EGFP2 20HB .....                           | 37 |
| 2.2.2.2 sc_EGFP2 20HB-LPv2.....                       | 39 |
| 2.2.2.3 sc_EGFP2 20HB-Circ.....                       | 41 |
| 2.2.3 sc_EGFP3.....                                   | 43 |
| 2.2.3.1 sc_EGFP3 20HB .....                           | 44 |
| 2.2.4 sc_EGFP4.....                                   | 47 |
| 2.2.4.1 sc_EGFP4 20HB .....                           | 48 |
| 2.2.5 sc_EGFP5.....                                   | 51 |
| 2.2.5.1 sc_EGFP5 20HB .....                           | 52 |
| 2.2.5.2 sc_EGFP5 20HB-exL .....                       | 54 |
| 2.2.5.3 sc_EGFP5 20HB-exLP .....                      | 56 |
| 2.2.5.4 sc_EGFP5 16HB_2 .....                         | 58 |
| 2.2.6 sc_EGFP6.....                                   | 67 |
| 2.2.6.1 sc_EGFP6 20HB .....                           | 68 |
| 2.2.6.2 sc_EGFP6 20HB-exLP .....                      | 70 |
| 2.2.7 sc_mCherry5.....                                | 73 |
| 2.2.7.1 sc_mCherry5 16HB_1 .....                      | 74 |

# 1. Materials and Methods

## 1.1 Scaffold cloning

Plasmids encoding for custom scaffolds were created via standard cloning techniques. All plasmids, with the exception of sc\_EGFP3, were created via Golden gate assembly using either Esp3I (NEB cat. no. R0734), or BsaI-HF@v2 (NEB cat. no. R3733), together with T4 DNA ligase (NEB cat. no. M0202). For each plasmid, appropriate cut sites were introduced with PCR, and the assembly was conducted as per manufacturer's protocol.

The exception, sc\_EGFP3, was assembled via digestion ligation, and compatible enzyme cut sites were added to the fragment of interest by means of PCR. Enzymes EcoNI and PacI (NEB cat. no. R0521 and R0547 respectively) were used to digest fragments of interest, and then ligated using NEB T4 DNA ligase, as above.

Touchdown PCR with primers for all constructs are detailed in Table S1. In all cases, PCR products were confirmed by agarose gel electrophoresis (AGE), bands were excised, and fragments were extracted (Qiagen QIAquick Gel Extraction Kit) as per manufacturer's protocol.

**Table S1 | Primer sequences used for the construction of plasmids for custom scaffold production.**

| Plasmid     | Template                | Primer | Sequence 5' - 3'                        |
|-------------|-------------------------|--------|-----------------------------------------|
| sc_EGFP1    | Addgene plasmid #126854 | FWD    | CTGGATGGTCTCCgtgacattaagcgcggcggggtg    |
|             |                         | REV    | CTGGATGGTCTCCaatgagtgagcaaaaggccagca    |
|             | Addgene plasmid #13031  | FWD    | CTGGATGGTCTCCcattgatatacgcgttgacattga   |
|             |                         | REV    | CTGGATGGTCTCCtcacattccgcctcagaagccat    |
| sc_EGFP2    | Addgene plasmid #126854 | FWD    | CACTGACGTCTCTgtgacattaagcgcggcggggtg    |
|             |                         | REV    | CACTGACGTCTCTaatgagtgagcaaaaggccagca    |
|             | Addgene plasmid #13031  | FWD    | CACTGACGTCTCTcattgcctcagaagccataga      |
|             |                         | REV    | CACTGACGTCTCTtcacagatatacgcggttgacattga |
| sc_EGFP3    | Addgene plasmid #105530 | FWD    | TTAATTAACattaagcgcggcggggtg             |
|             |                         | REV    | CCTAATTAAGGgtgagcaaaaggccagcaaa         |
| sc_EGFP4    | sc_EGFP3                | FWD    | CACTGACGTCTCTcattatgctctaggaagatcgga    |
|             |                         | REV    | CGTGATCGTCTCTaatgtaagggtgagcaaaaggcca   |
| sc_EGFP5    | sc_EGFP3                | FWD    | CACTGACGTCTCTcattgccttaattaacattaagcgc  |
|             |                         | REV    | CACTGACGTCTCTaatgcgccatgctacttatctacg   |
| sc_EGFP6    | sc_EGFP3                | FWD    | AGATGGCGTCTCCttagggcctcagtgagcgcgagcg   |
|             |                         | REV    | AGATGGCGTCTCCaggggcctcagtgagcgcgagcg    |
|             |                         | FWD    | AGATGGCGTCTCCcccttaattaacattaagcgcg     |
|             |                         | REV    | AGATGGCGTCTCCcctaatTAAGGgtgagcaaaagg    |
| sc_mCherry5 | sc_EGFP5                | FWD    | TGGCTACGTCTCGgtgattgatccaatcaacctctg    |
|             |                         | REV    | TGGCTACGTCTCGaatgcctgacacctgtggaga      |
|             | Addgene plasmid #127813 | FWD    | TGGCTACGTCTCGcattattcgccaccatggtgag     |
|             |                         | REV    | TGGCTACGTCTCGtaccgccctcactgtacagct      |

## 1.2 Scaffold production

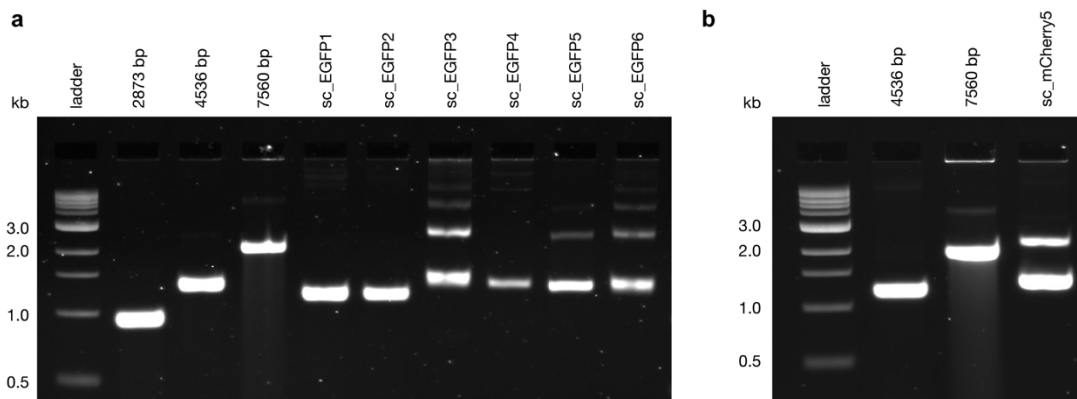

**Fig. S1 | AGE showing all custom scaffolds created in this study.** ssDNA markers at 2873 bp, 4535 bp and 7560 bp were used as molecular weight markers, while 'ladder' depicts NEB 1 kb dsDNA ladder.

## 1.3 DNA origami folding

**Table S2 | Folding conditions summary for each of the structures and scaffolds used.**

| Scaffold    | Structure      | Program | 10x Folding Buffer | v(scaffold, 100 nM), $\mu\text{L}^*$ | v(staples, 100 $\mu\text{M}$ ), $\mu\text{L}^*$ |
|-------------|----------------|---------|--------------------|--------------------------------------|-------------------------------------------------|
| sc_EGFP1    | 20HB-ext       | 3       | FoB10              | 10                                   | 8                                               |
|             | 20HB-int       | 1       | FoB10              | 10                                   | 8                                               |
|             | 20HB-ext-W     | 1       | FoB15              | 10                                   | 8                                               |
|             | 20HB-int-W     | 1       | FoB15              | 10                                   | 8                                               |
|             | 32HB           | 1       | FoB20              | 10                                   | 8                                               |
|             | 12HB           | 2       | FoB10              | 10                                   | 8                                               |
|             | 20HB LS        | 3       | FoB15              | 10                                   | 8                                               |
|             | 20HB LP        | 1       | FoB20              | 10                                   | 8                                               |
|             | 20HB LPv2      | 1       | FoB20              | 10                                   | 8                                               |
| 20HB Circ   | 3              | FoB10   | 10                 | 8                                    |                                                 |
| sc_EGFP2    | 20HB           | 1       | FoB10              | 10                                   | 8                                               |
|             | 20HB LPv2      | 3       | FoB15              | 10                                   | 8                                               |
|             | 20HB Circ      | 3       | FoB10              | 10                                   | 8                                               |
| sc_EGFP3    | 20HB           | 5       | FoB20              | 2.5                                  | 8 <sup>‡</sup>                                  |
| sc_EGFP4    | 20HB           | 2       | FoB15              | 10                                   | 8                                               |
| sc_EGFP5    | 20HB           | 3       | FoB15              | 4                                    | 14                                              |
|             | 20HB loop      | 5       | FoB10              | 4                                    | 8                                               |
|             | 20HB loop LPv2 | 4       | FoB15              | 4                                    | 8                                               |
|             | 16HB_2         | 7       | FoB12.5            | 10                                   | 8                                               |
|             | 16HB_3         | 7       | FoB25              | 10                                   | 8                                               |
|             | 16HB_4         | 7       | FoB7.5             | 10                                   | 8                                               |
| sc_EGFP6    | 20HB           | 2       | FoB15              | 4                                    | 14                                              |
|             | 20HB LPv2      | 6       | FoB10              | 4                                    | 8                                               |
| sc_mCherry5 | 16HB_1         | 1       | FoB10              | 10                                   | 8                                               |

\*For 20  $\mu\text{L}$  folding reaction, where necessary volume supplemented to 20  $\mu\text{L}$  total with ddH<sub>2</sub>O.

‡Staples used here were at 500  $\mu\text{M}$  concentration.

**Table S3 | Folding programs used for the folding reactions detailed in Table S2.**

| Program  | 1. Denaturation time |        | 2. Temperature ramp   | 3. Storage temperature |
|----------|----------------------|--------|-----------------------|------------------------|
|          | 30 s                 | 15 min |                       |                        |
| <b>1</b> | -                    | 65 °C  | 60–44 °C, at 1 °C/1 h | 20 °C                  |
| <b>2</b> | -                    | 65 °C  | 60–44 °C, at 1 °C/2 h | 20 °C                  |
| <b>3</b> | 70 °C                | 65 °C  | 60–35 °C, at 1 °C/1 h | 20 °C                  |
| <b>4</b> | 70 °C                | 65 °C  | 60–35 °C, at 1 °C/2 h | 20 °C                  |
| <b>5</b> | 70 °C                | 65 °C  | 60–35 °C, at 1 °C/4 h | 20 °C                  |
| <b>6</b> | 70 °C                | 65 °C  | 60–30 °C, at 1 °C/1 h | 20 °C                  |
| <b>7</b> | -                    | 65 °C  | 60–44 °C, at 1 °C/4 h | 20 °C                  |

## 2. Supplemental Data

### 2.1 Characterisation and supporting information

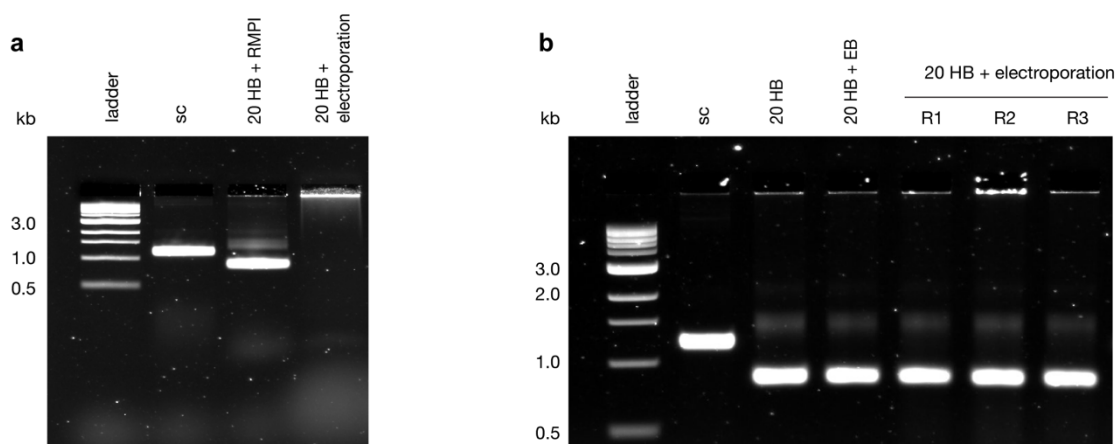

**Fig. S2 | 20 HB structure integrity after electroporation.** **a**, Structural integrity of the 20HB was maintained when diluted in RPMI 1640 media but demonstrated complete aggregation after electroporation in a traditional cuvette. **b**, 20HBs were stable in both the electroporation buffer (EB, buffer R in kit) and after electroporation using the Neon™ transfection system. R1-R3 depicts 3 independent replicates. 'Sc' is the corresponding sc<sub>EGFP1</sub> ssDNA scaffold strand, while 'ladder' depicts NEB 1 kb dsDNA ladder.

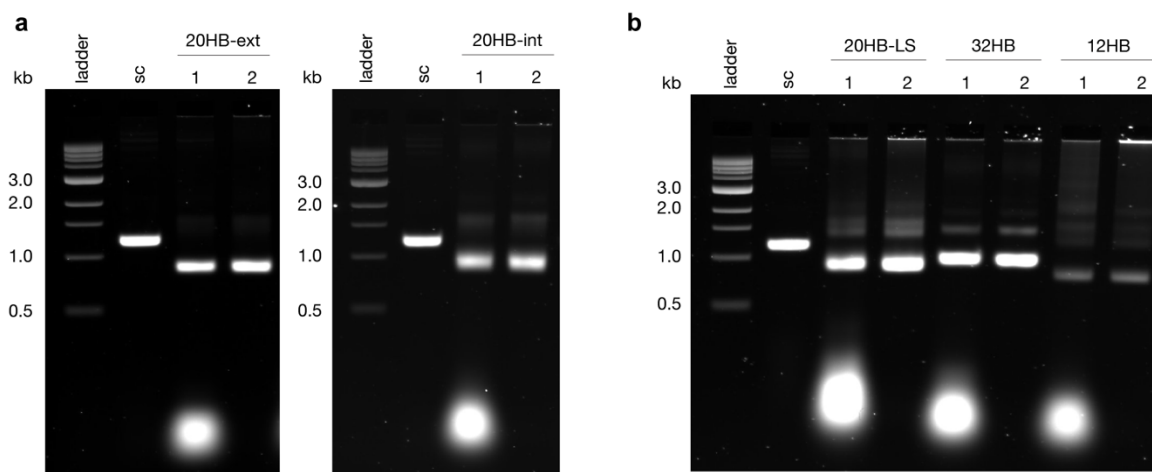

**Fig. S3 | Purified DNA origami objects based on sc<sub>EGFP1</sub> scaffold.** **a**, Crude and PEG-purified DNA origami objects are given in lane 1 and 2 for 20HB-ext and 20HB-int respectively. **b**, Crude and PEG-purified DNA origami objects are given in lane 1 and 2 for 20HB-LS, 32HB and 12HB respectively. The corresponding sc<sub>EGFP1</sub> ssDNA scaffold strand is given by 'sc', while 'ladder' depicts NEB 1 kb dsDNA ladder.

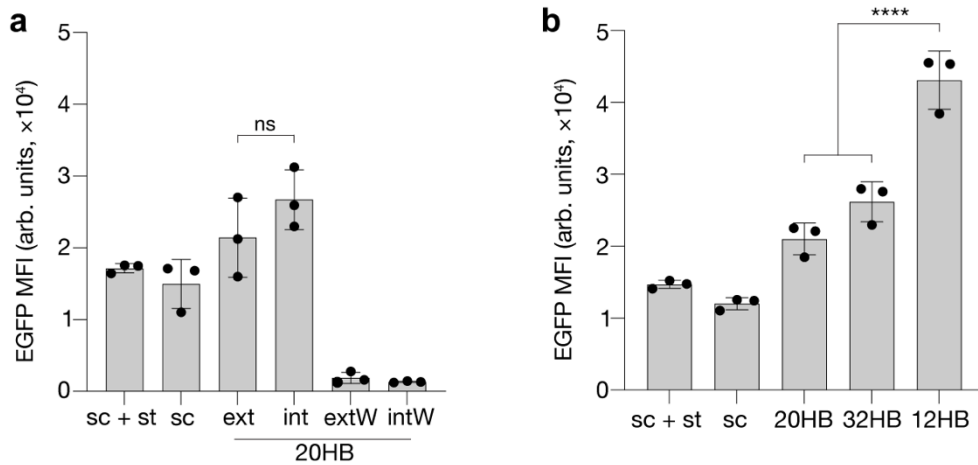

**Fig. S4 | Mean fluorescence intensity of EGFP depending on gene orientation.** **a**, HEK293T cells transfected with either 20HB-ext or 20HB-int demonstrated no significant difference in the EGFP MFI. **b**, HEK293T cells transfected with either 20HB(-ext) or 32HB demonstrated no statistically significant difference in EGFP MFI. Transfection with 12HB demonstrated significantly higher EGFP MFI compared to both 20HB(-ext) and 32HB. Data was collected quantified using flow cytometry and are presented as mean  $\pm$  s.d. for  $n = 3$  biologically independent experiments, individual data points are overlaid. Statistical analysis in was performed using one-way ANOVA with Tukey's multiple comparison (\*\*\*\* $p \leq 0.0001$ , ns  $p > 0.05$ ).

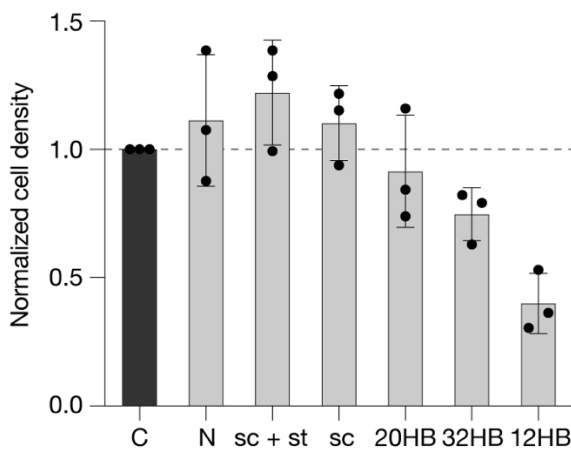

**Fig. S5 | Cell density after electroporation of HEK293T cells.** Single cell density was counted via AttuneNxt Flow Cytometer 48 h after electroporation. 'C' represents untreated control, 'N' represents control electroporated with blank buffer. Cell densities were normalized against control C. The data is presented as mean  $\pm$  s.d. with individual data points overlaid, the data given is from  $n = 3$  biologically independent experiments.

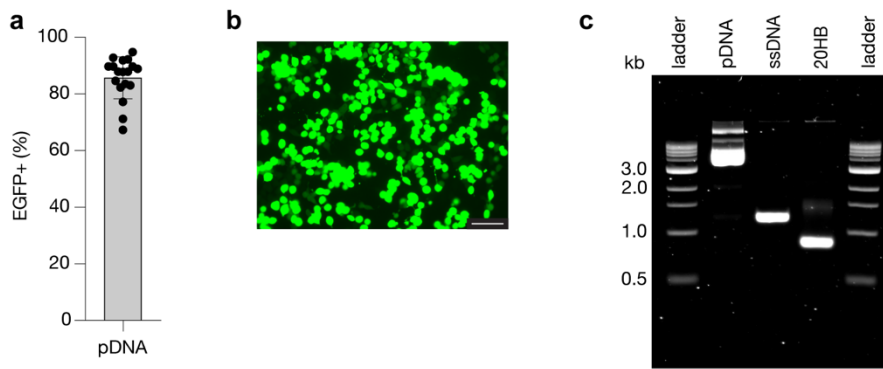

**Fig. S6 | Electroporation in HEK293T cells using plasmid EGFP-encoding plasmid DNA (pDNA).** **a**, Transfection efficiency in HEK293T cells, with representative epifluorescent image given in **b**. The data is presented as mean  $\pm$  s.d. with individual data points overlaid, the data given is from  $n = 18$  biologically independent experiments, where similar results were observed each time. Scale bar is  $100 \mu\text{m}$ . Plasmid DNA was used as a positive control, however cannot be directly compared to the electroporation of ssDNA and folded DNA origami objects due to differences in electrophoretic mobility, as demonstrated in **c**. Plasmid DNA is given as pDNA, and the corresponding EGFP-encoding ssDNA scaffold strand and 20HB origami object is given as ssDNA and 20HB respectively, while 'ladder' depicts NEB 1 kb dsDNA ladder.

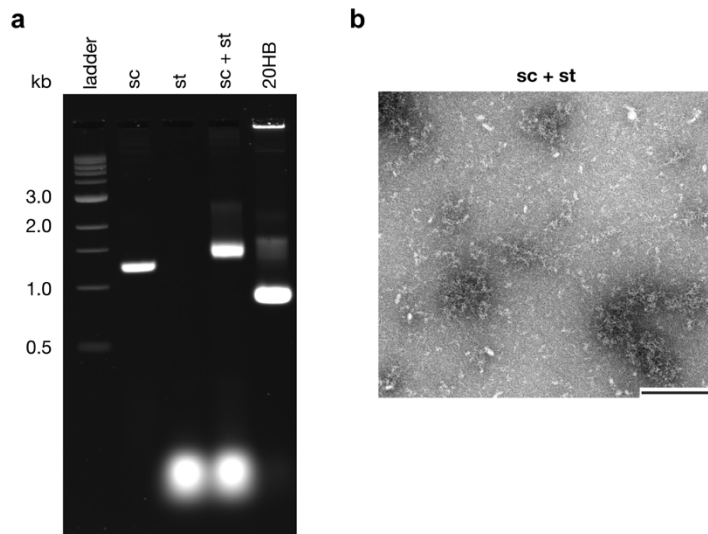

**Fig. S7 | Staples associate with scaffold after mixing.** **a**, Staples and scaffold were mixed ('sc + st') and incubated at rt for 10 min, while 20HB represents the corresponding purified folded object. A slight shift in the 'sc + st' band compared to scaffold only ('sc') demonstrates some staple association has occurred, but no structure has folded. 'st' is the corresponding mixture of staples, and 'ladder' depicts NEB 1 kb dsDNA ladder. **b**, Representative negative stain TEM image of the corresponding sc + st mixture. Scale bar  $100 \text{ nm}$ .

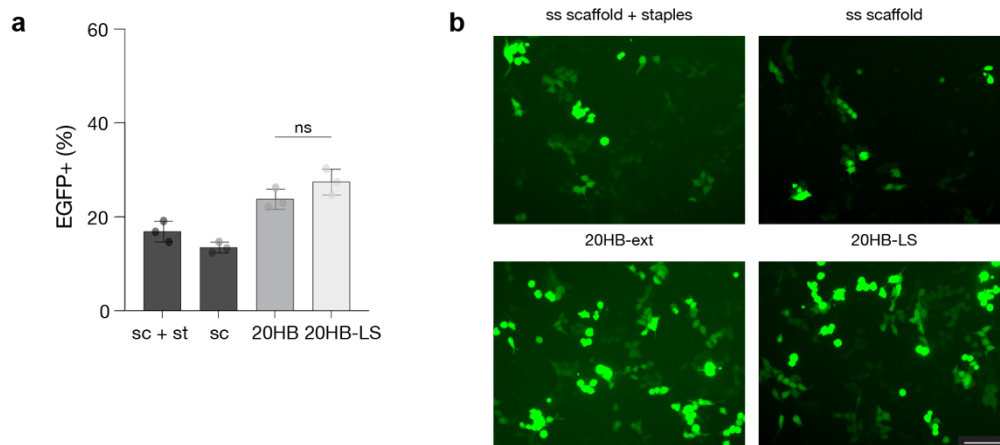

**Fig. S8 | Electroporation of 20HB designs with different staple routings.** 20HB with typical staple routings, as tested previously (20HB-ext, average staple length of ~ 42 bases) was compared to a 20HB design with longer staples and fewer staple crossovers (20HB-LS, average staple length of ~ 57 bases). **a**, Quantification of EGFP positive cells by flow cytometry is given in **a**. The data is presented as mean  $\pm$  s.d. with individual data points overlaid. One-way ANOVA with Tukey's multiple comparison was performed to test statistically significant differences between samples. Both 20HB-ext and 20HB-LS demonstrated statistically significant increases in EGFP expression compared to ss scaffold + staples ( $p < 0.05$ ,  $p < 0.01$  respectively) and ss scaffold only ( $p < 0.01$ ,  $p < 0.001$  respectively). No statistically significant difference was observed between 20HB-ext and 20HB-LS (ns). Representative epifluorescent microscopy images demonstrating EGFP expression are given in **b**. The data in both **a** and **b** is representative of  $n = 3$  biologically independent experiments, where similar results were observed each time. Scale bar is 100  $\mu\text{m}$ .

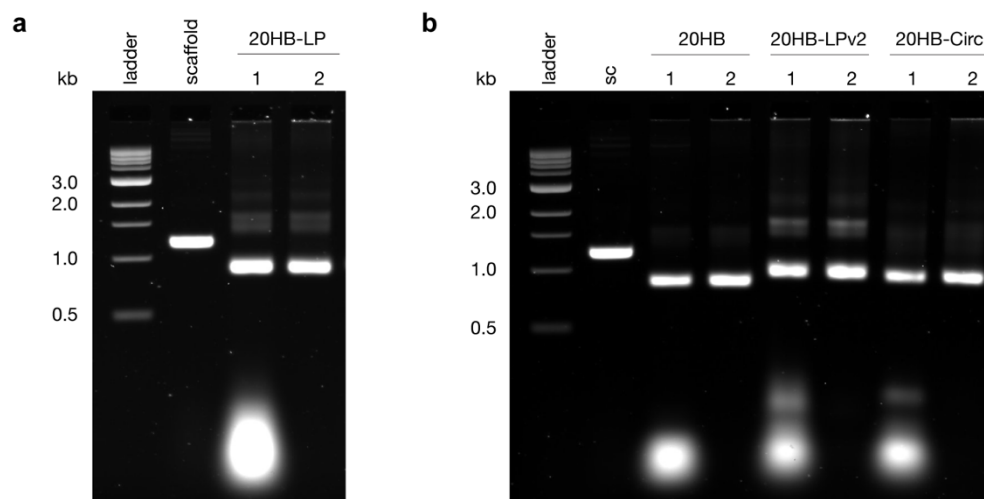

**Fig. S9 | Purified DNA origami objects based on sc\_EGFP1 scaffold with alternative staple designs.** **a**, Crude and PEG-purified DNA origami objects are given in lane 1 and 2, respectively, for 20HB-LP. **b**, Crude and PEG-purified DNA origami objects are given in lane 1 and 2, respectively, for 20HB, 20HB-LPv2 and 20HB-Circ. The corresponding sc\_EGFP1 ssDNA scaffold strand is given by 'sc', while 'ladder' depicts NEB 1 kb dsDNA ladder.



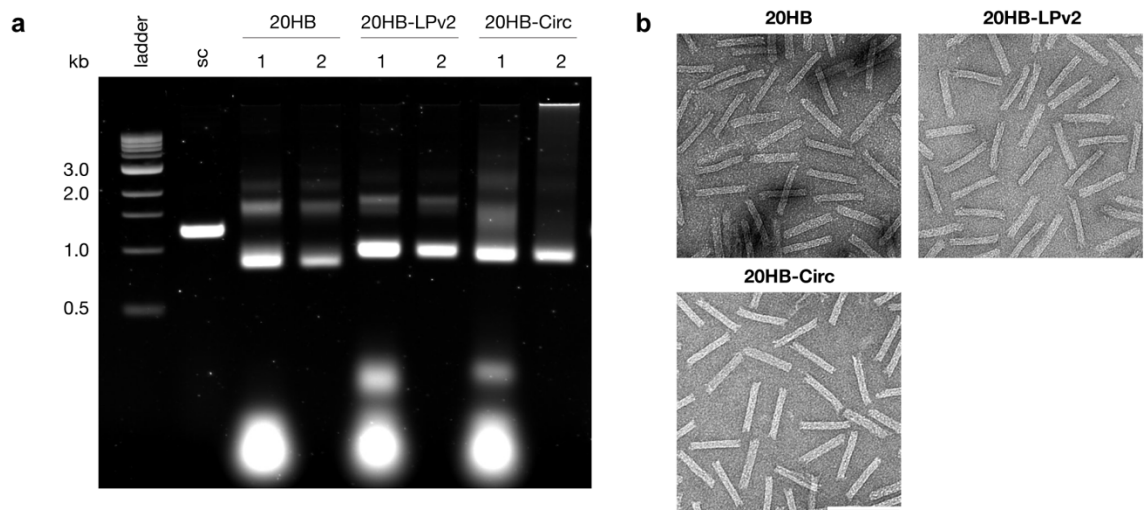

**Fig. S10 | Purified DNA origami objects based on sc\_EGFP2 scaffold.** **a**, Crude and PEG-purified DNA origami objects are given in lane 1 and 2 for 20HB, 20HB-LPv2 and 20HB-Circ. The corresponding sc\_EGFP2 ssDNA scaffold strand is given by 'sc', while 'ladder' depicts NEB 1 kb dsDNA ladder. **b**, Representative negative stain TEM images of the corresponding purified DNA origami objects. Scale bar 100 nm.

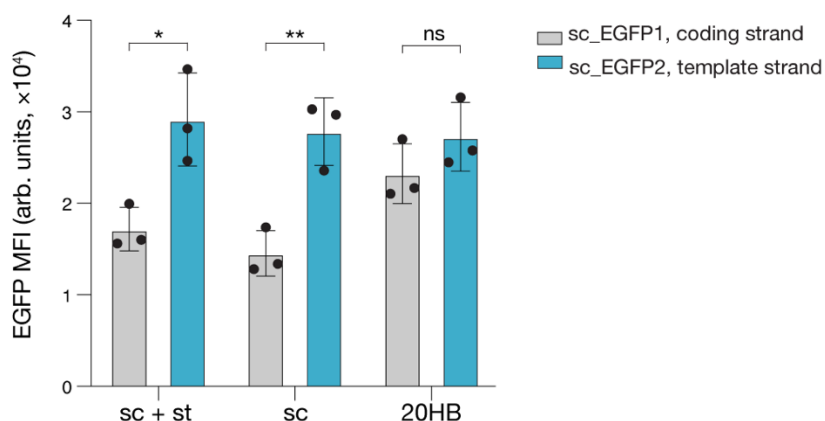

**Fig. S11 | Mean fluorescence intensity of EGFP depending on scaffold orientation.** HEK293T cells transfected with either sc\_EGFP2 scaffold + staple mixture, or scaffold only, demonstrated significantly higher EGFP MFI than that of the sc\_EGFP1 counterpart. No significant difference in the transfection efficiency from 20HB structures was observed. Data was collected quantified using flow cytometry and are presented as mean  $\pm$  s.d. for  $n = 3$  biologically independent experiments, individual data points are overlaid. Statistical analysis in was performed using Student's t-test (\* $p \leq 0.05$ , \*\* $p \leq 0.01$ , \*\*\* $p \leq 0.001$ , ns  $p > 0.05$ ).

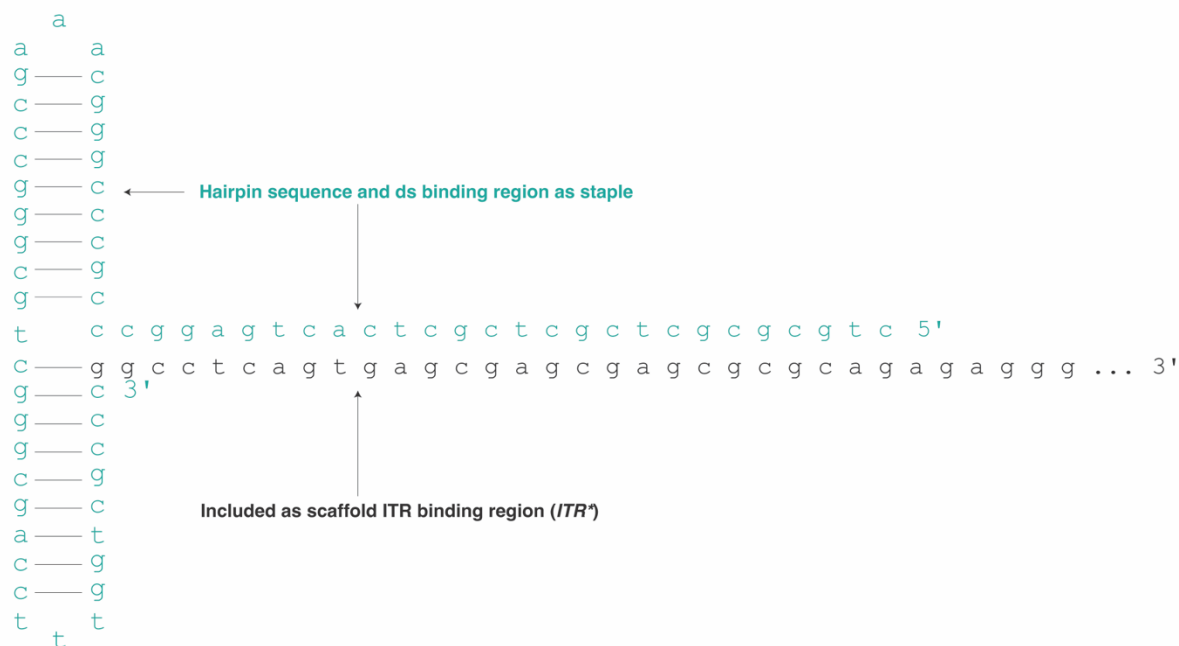

**Fig. S12 | Exemplary schematic of ITR design for sc\_EGFP6 scaffold.** ITR hairpin and complementary binding sequence (green) was removed from the scaffold sequence, to be included as a separate staple. The sequence remaining in the scaffold (black) is given as the ITR binding region (*ITR\**).

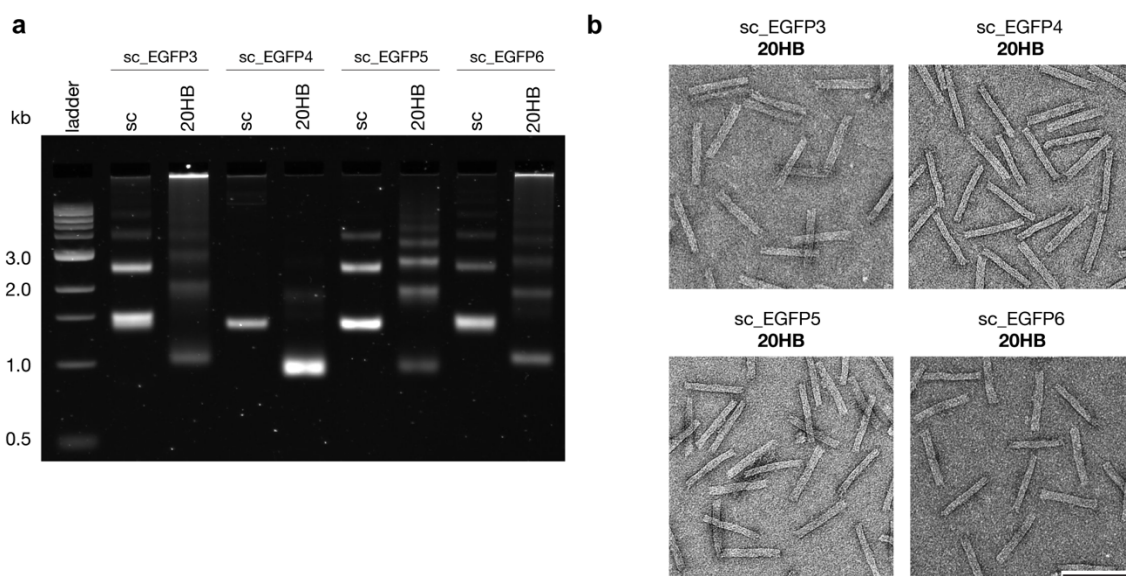

**Fig. S13 | Purified DNA origami objects based on alternative scaffolds sc\_EGFP3, sc\_EGFP4, sc\_EGFP5 and sc\_EGFP6.** **a**, Gel-purified origami objects. For each scaffold, the first lane ('sc') depicts the scaffold only MW control, while the second lane depicts the folded 20HB object. Higher order bands can be seen some of the scaffold samples, and in folded origami samples. In **a** 'ladder' depicts NEB 1 kb dsDNA ladder. **b**, Representative negative stain TEM images corresponding to each of the samples. Scale bar is 100 nm.

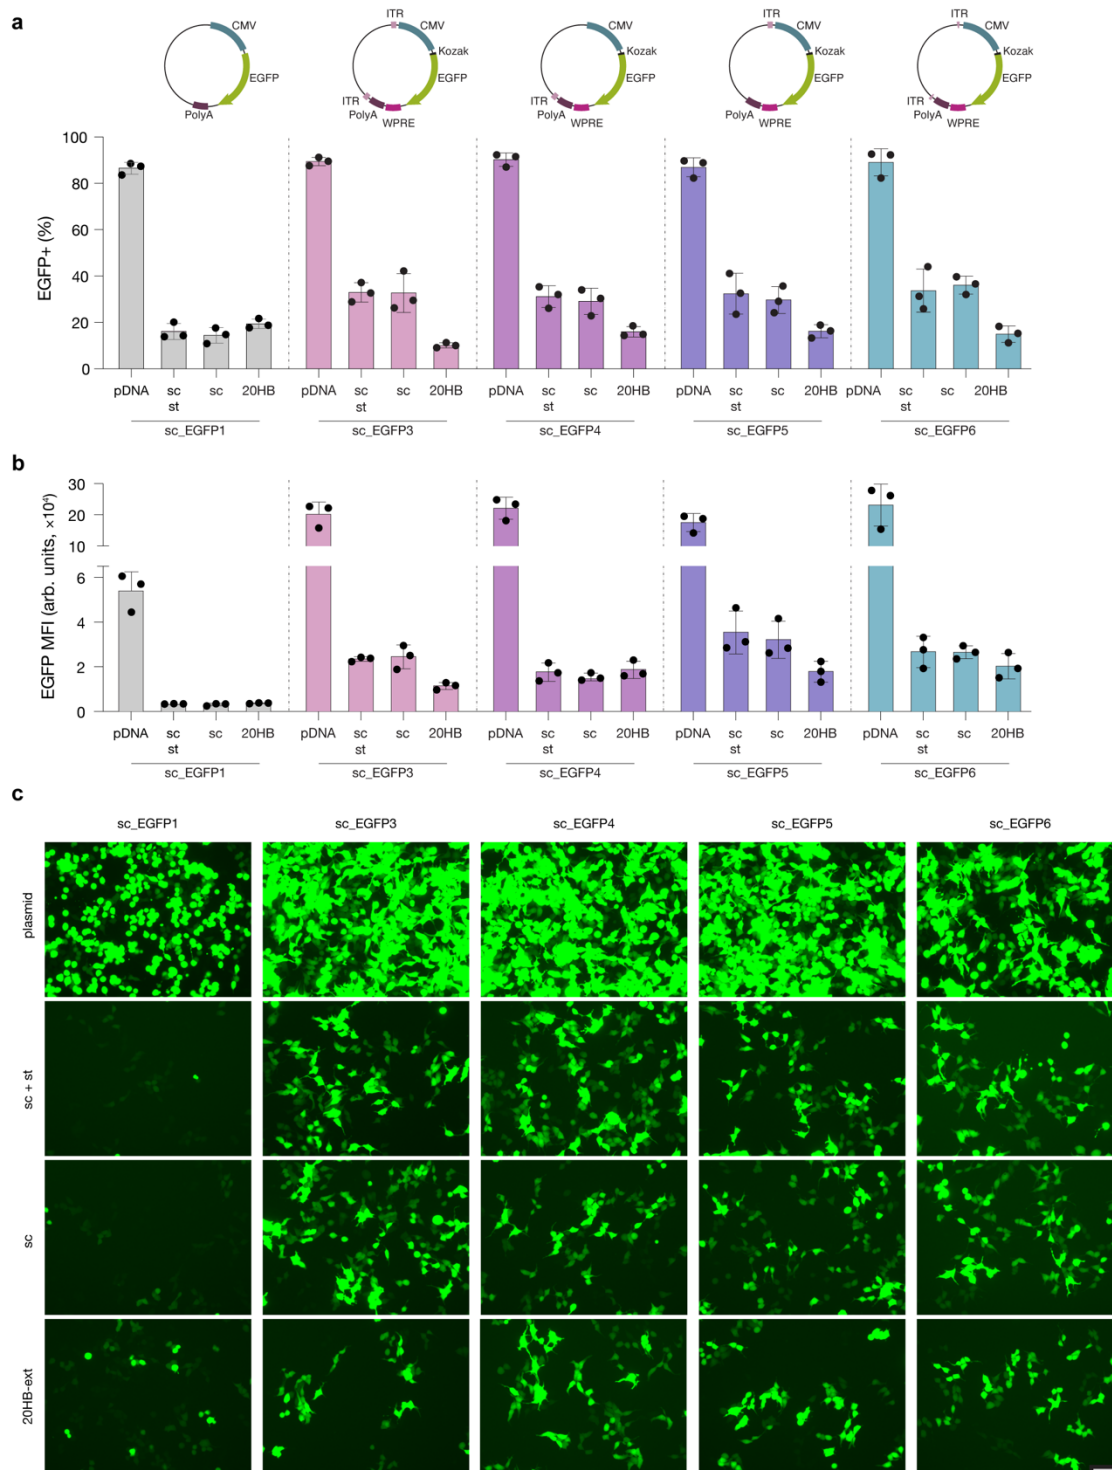

**Fig. S14 | Screening expression from different scaffold sequence designs.** To improve expression of ssDNA several sequence features, encoding for chimeric intron, kozak, WPRE, and ITRs were incorporated in the scaffold. Scaffolds with several ITR sequence derivatives were also investigated. Each ss scaffold DNA was expressed and folded into a 20HB. **a**, Plasmid/scaffold design schematics, CMV promoter (pink), kozak sequence (black), EGFP (green), WPRE (yellow), polyA (blue) and ITRs (purple) are shown. The ITR components are present in full at both upstream and downstream of the expression cassette (sc\_EGFP3), only downstream (sc\_EGFP4) and only upstream (sc\_EGFP5). The final design (sc\_EGFP6) has been constructed so that the only D-D' and A-A' ITR sequences are present on the scaffold strand, and the hairpin B-B', C-C', and corresponding A-A' sequence was supplied on staples strands. Plasmid, ss scaffold + staples (sc + st), ss scaffold (sc) and 20HB origami with the various sequences were electroporated into HEK293T cells and quantified by flow cytometry, looking at population of EGFP positive cells **a**, and mean fluorescent intensity (arb. units) **b**. Data is presented as mean  $\pm$  s.d. with

individual data points overlaid. Representative epifluorescent microscopy images for each of the conditions is given in **c**. All data **a–c** is representative of  $n = 3$  biologically independent experiments, where similar results were observed each time. Scale bar is  $100 \mu\text{m}$ .

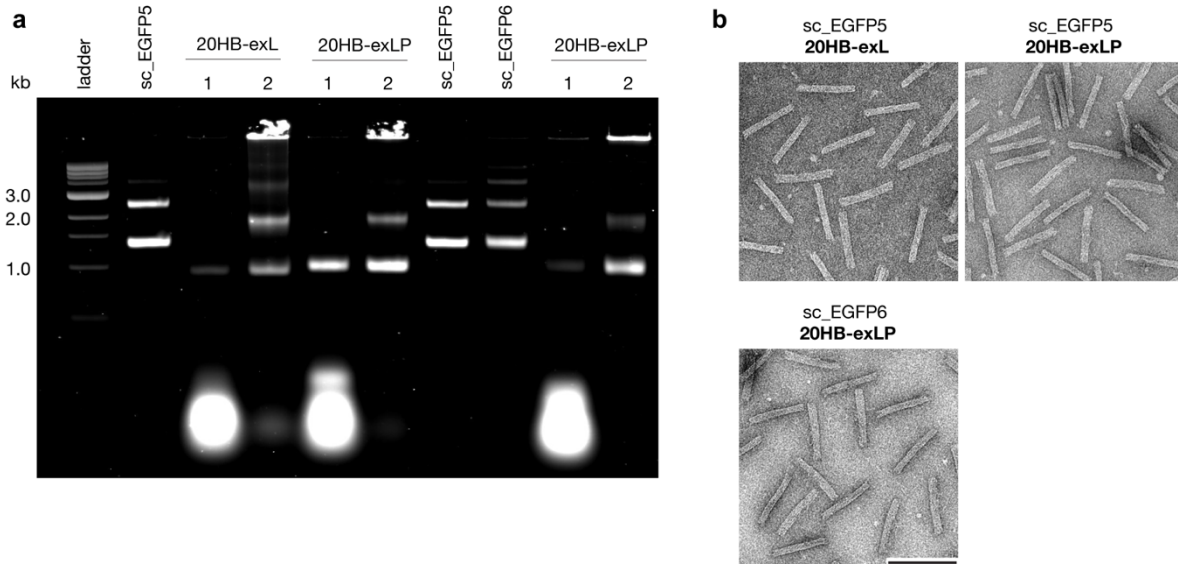

**Fig. S15 | Purified DNA origami objects based on alternative scaffolds sc\_EGFP5 and sc\_EGFP6 with external loops and long promoter staple.** **a**, Crude and PEG-purified DNA origami objects are given in lane 1 and 2 respectively for 20HB-exL, 20HB-exLP (sc\_EGFP5) and 20HB-exLP (sc\_EGFP6). Respective ssDNA scaffolds are included as MW controls, while 'ladder' depicts NEB 1 kb dsDNA ladder. **b**, Representative negative stain TEM images corresponding to each of the samples. Scale bar is  $100 \text{ nm}$ .

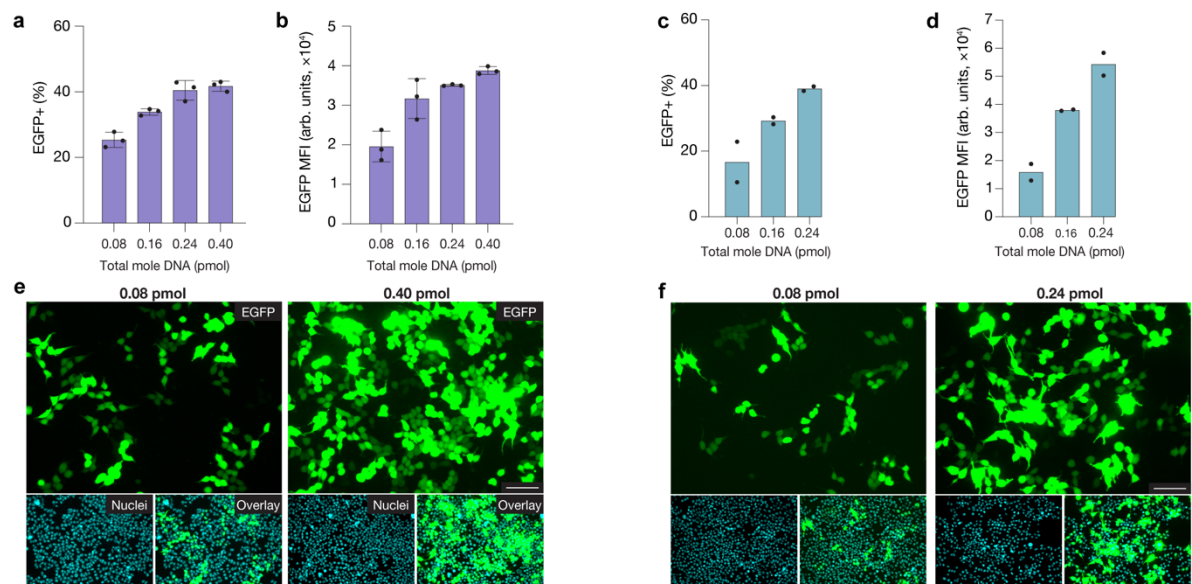

**Fig. S16 | Titration of 20HB achieves high transfection efficiency.** Titrating the 20HB-exLP folded from the sc\_EGFP5 (**a** and **b**) and sc\_EGFP6 (**c** and **d**) scaffolds increased both the transfection efficiency and MFI, respectively. Data is presented as mean  $\pm$  s.d. (**a**, **b**) or mean (**c**, **d**) with individual data points overlaid. **e** and **f**, Representative epifluorescent microscopy images demonstrated the expression of EGFP by successfully transfected cells. For each of the conditions, EGFP expression (green), cell nuclei (blue) and the overlay are given. The images are representative of one of  $n = 3$  and  $n = 2$  biologically independent experiments for **e** and **f** respectively; similar results were observed each time. Scale bar  $100 \mu\text{m}$ .

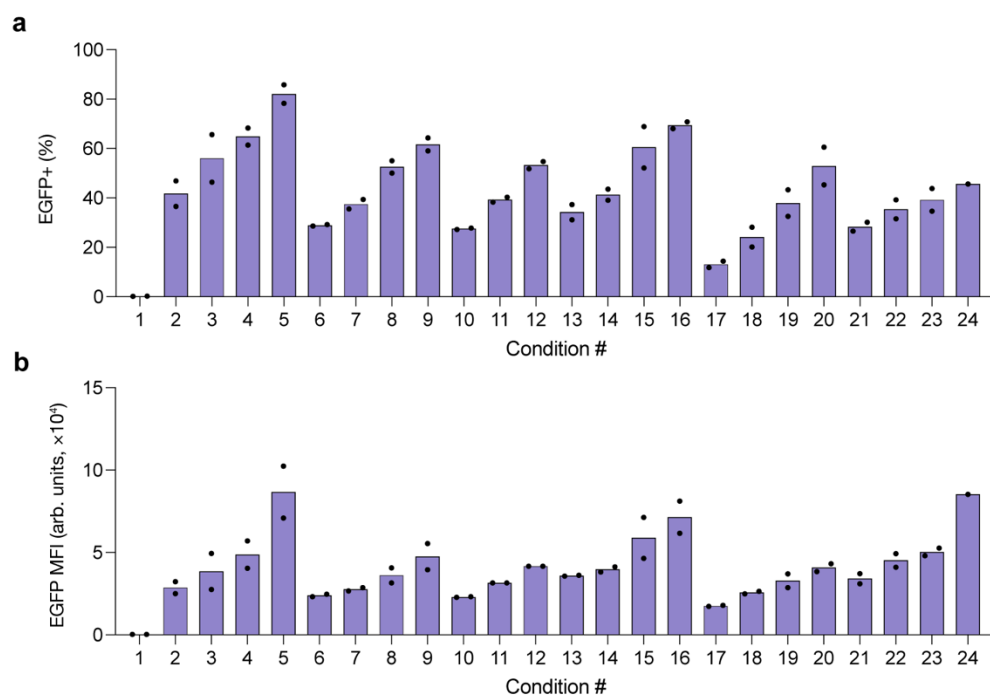

**Fig. S17 | Electroporation condition screen in HEK293T cells.** Electroporation conditions were screened to optimise delivery of 20HB DNA origami objects. 20HB-exLP sample from scaffold sc\_EGFP5 was used in all conditions. Numbers refer to programs detailed in Table S4. Data is presented as mean with individual data points overlaid representing biologically independent experiments.

**Table S4 | Electroporation conditions screened as featured in Fig S17.**

| Sample | Pulse voltage (V) | Pulse width (ms) | Pulse no. |
|--------|-------------------|------------------|-----------|
| 1      | -                 | -                | -         |
| 2      | 1400              | 20               | 1         |
| 3      | 1500              | 20               | 1         |
| 4      | 1600              | 20               | 1         |
| 5      | 1700              | 20               | 1         |
| 6      | 1100              | 30               | 1         |
| 7      | 1200              | 30               | 1         |
| 8      | 1300              | 30               | 1         |
| 9      | 1400              | 30               | 1         |
| 10     | 1000              | 40               | 1         |
| 11     | 1100              | 40               | 1         |
| 12     | 1200              | 40               | 1         |
| 13     | 1100              | 20               | 2         |
| 14     | 1200              | 20               | 2         |
| 15     | 1300              | 20               | 2         |
| 16     | 1400              | 20               | 2         |
| 17     | 850               | 30               | 2         |
| 18     | 950               | 30               | 2         |
| 19     | 1050              | 30               | 2         |
| 20     | 1150              | 30               | 2         |
| 21     | 1300              | 10               | 3         |
| 22     | 1400              | 10               | 3         |
| 23     | 1500              | 10               | 3         |
| 24     | 1600              | 10               | 3         |

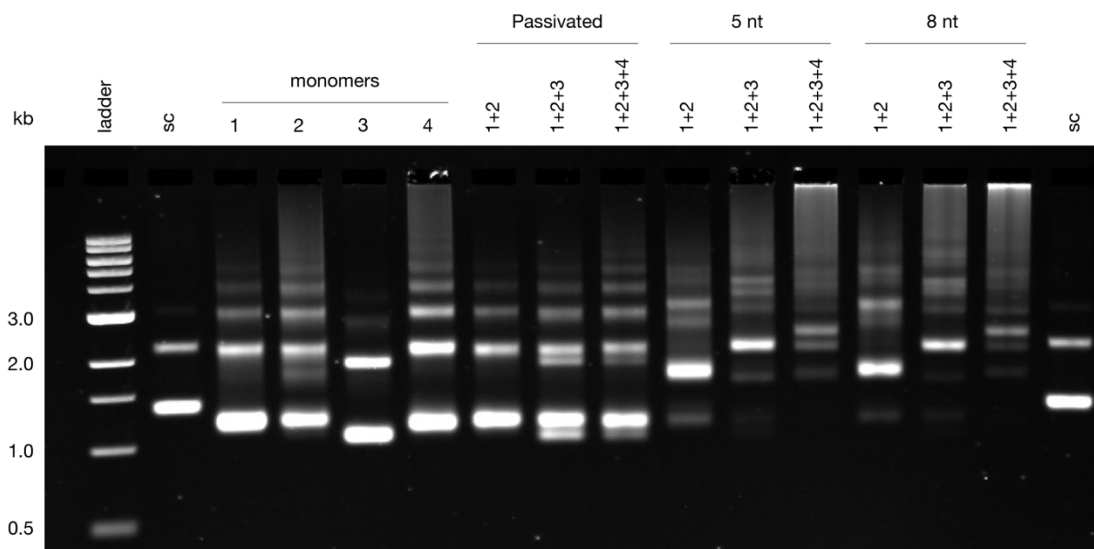

**Fig. S18 | AGE of purified DNA origami objects and assembly products.** Lanes labelled 1 – 4 demonstrate purified monomer samples. Lanes 1+2, 1+2+3 and 1+2+3+4 demonstrate the monomer addition to create dimer, trimer, and tetramer higher-order structures respectively. No assembly can be observed in the passivated samples. sc\_EGFP5 was used as MW control, while 'ladder' depicts NEB 1 kb dsDNA ladder.

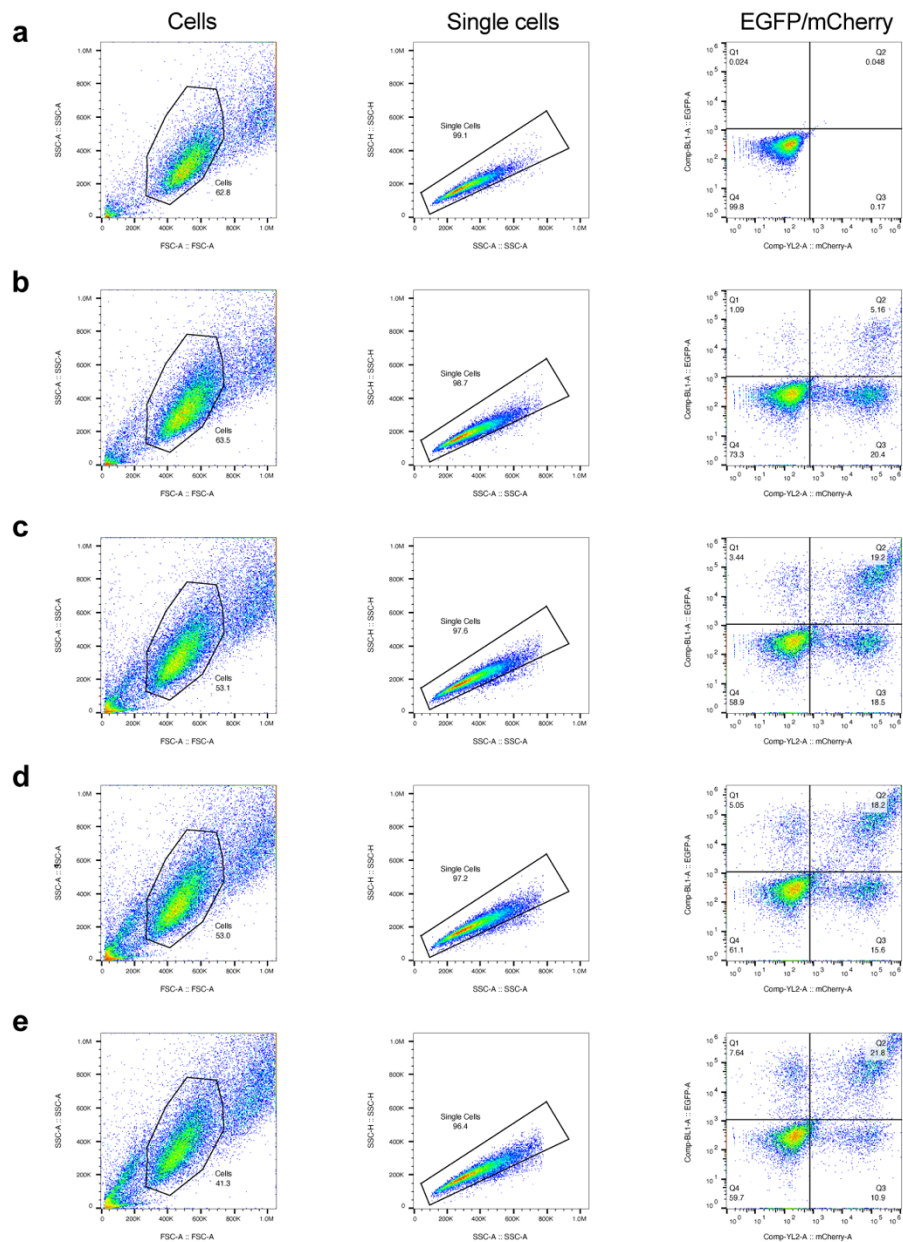

**Fig. S19 | Exemplary flow cytometry gating.** From left to right: cell populations were first gated on forward scatter-area (FCS-A) versus side scatter-area (SSC-A), gate 'cells'; single cells were selected by gating SSC-A versus side scatter-height (SSC-H), gate 'single cells'; cells were then assessed for EGFP and/or mCherry expression. In this example, cell populations were investigated for expression of both mCherry (x-axis) and EGFP (y-axis) expression, where cells can be either EGFP+/mCherry- (Q1), EGFP+/mCherry+ (Q2), EGFP-/mCherry+ (Q3) or EGFP-/mCherry- (Q4). **a** gives representative gating for untreated cells, **b** demonstrates delivery of individual passivated mCherry and EGFP origami objects at a 1:1 ratio mCherry:EGFP. Delivery of objects assembled with 8 nt overhangs at mCherry:EGFP ratios of 1:1, 1:2 and 1:3 are given in **c–e**, respectively.

## 2.2 Scaffold sequences and origami design

### 2.2.1 sc\_EGFP1

#### **Scaffold sequence for sc\_EGFP1:**

cgcggtgacattgattattgactagttattaatagtaaatcaattacggggcattagttcatagcccatatatggagttccggttacataacttacggt  
aaatggccccgctggctgaccgccaacgacccccgccattgacgtcaataatgacgtatgtcccatagtaacgccaatagggactttcca  
tgacgtcaatgggtggagtttacggtaaactgccacttggcagtacatcaagtgtatcatatgccaaagtagccccctattgacgtcaatga  
cggtaaatggccccgctggcattatgccagtagacatgacctatgggactttcctacttggcagtagacatctacgtattagtcacgtattaccatgg  
tgatgcggttttggcagtagacatcaatggcggtggatagcgggttggactcacggggattccaagtctccaccctattgacgtcaatgggagttgtt  
tggcaccaaaatcaacgggactttcaaaaatgtcgtacaactccgccccattgacgcaaatggcggttagcggtgacgtgggaggttcta  
tataagcagagctctctggtaactagagaaccactgcttactggctatcgaaataatagactcactatagggagaccaagcttggtagc  
gagctcggatccactagtaacggccgaccagtgtgctggaattctgcagatccatcacactggcgccgctcgagatggtagcaagggcg  
aggagctgttaccgggggtggtgccatctgtgagctggacggcgacgtaaacggccacaagttcagcgtgcccggcgagggcgagg  
gcatgaccacacggaagctgacctgaagttcatctgcaccaccggaagctgcccgtgccctggcccaccctcgtgaccaccctgacc  
tacggcggtcagtgctcagccgtaccaccgaccatgaagcagcagcacttctcaagtcgacctgcccgaaggctacgtccaggagc  
gcaccatcttcaaggacgacggcaactacaagaccgcccggagggtgaagttcagggcgacaccctggtgaaccgcatcagctga  
agggcatcagctcaaggaggacggcaacatctggggcacaagctggagtagaactacaacagccacaacgtctatatcatggccgaca  
agcagaagaacggcatcaaggtaactcaagatccgccaacaatcggaggcggcagcgtgcagctcggcaccactaccagcagaa  
caccctcatcgccgacggccccgtgctgctgcccgaaccactacctgagcaccagtcgcccctgagcaaaagaccccaacgagaagc  
gcatcacatggtctgctggagttcgtgaccgcccgggatcactctcggcatggacgagctgtacaagtaactagagggccctattctat  
agtgtcacctaaatgctagagctcgtgatcagcctcagctgtgcttctagtgtccagccatctgttttggcccctccccctgccccttctgacc  
tggaaaggtgccactcccactgtccttctcaataaaaatgaggaaatgcatcgcatgtctgagtaggtgtcattctattctgggggggtgggggtggg  
gcaggacagcaagggggaggattgggaagacaatagcaggcatgctggggatgctgggtgggctctatggctctgaggcggaaatgtgacatt  
aagcgcggcggtgtggtgttacgcgcagcgtgaccgctacacttgcagcgccttagcgcggctccttctcgttcttcccttcttctcggc  
acgttcgcccgttccccgtaagctctaaatcgggggctccccttagggttccgatttagtgccttacggcacctcgacccccaaaaaacttgatt  
aggggtgaggttcacgtagtgggccatgcccctgatagacgggttttgccttggacttggagtcacggttcttaatagtgagacttgttccaaa  
ctggaacaactcaaccctatctcgtctattctttgattataagggttttgcgattcggcctattggttaaaaaatgagctgatttaacaaaa  
atttaacgcgaatttaacaaaatattaacgcttacaatttaggtggcactttcggggaaatgtgcccgggaaccctatttggtttttctaaatac  
attcaaatatgatccgctcatgagacaataaccctgataaatgctcaataatattgaaaaaggaagatgagattcaacatttccgtgctg  
cccttattcccccttttgcggcattttgccttctgttttgcaccagaacgcgtgggtaagtaaaagatgctgaagatcagttgggtgacagag  
tgggttacatcgaactggatcacaacagcggtaagatccttgagagtttgcccccgaagaacgtttccaatgatgagcactttaaagttctgct  
atgtggcgcggtattatcccgtattgacgccgggaagagcaactcggctgccgcatacactattctcagaatgacttgggtgagtagtaccag  
tcacagaaaagcatcttacggatggcatgacagtaagagaattatgagtgctgcccataacctgagtgataaactgcccgaacttactct  
gacaacgatcggaggaccgaaggagctaaccgctttttgcacaacatggggatcatgtaactgccttgatcgttgggaaccggagctga  
atgaagccatacacaacgacgagcgtgacaccagatgctctgtagcaatggcaacaacgttgcgcaactattaactggcgaacttact  
ctagctccccgcaacaattaatagactggatggaggcggataaagttgcaggaccacttctgcgctcggccctccggctggtggttattgct  
gataaatctggagccggtgagcgtgggtctcgcggatcattgcagcactggggccagatgtaagccctcccgtatcgtagttatctacacga  
cggggagtcaggcaactatggatgaacgaaatagacagatcgtgagataggtgctcactgattaagcattggaactgtcagaccaagtt  
actcatatatactttagattgatttaaaactcatttttaatttaaaaggatctaggtgaagatcctttttgataatctcatgacaaaaatcccctaacgtg  
agtttctgtccactgagcgtcagaccccgtagaaaagatcaaaagatcttcttgagatcctttttctgcgcgtaactctgctgcttgaacaaaa  
aaaccaccgctaccagcgtggtttgttgcgggatcaagagctaccaactcttttccgaaggtaactggctcagcagagcgcagatacaca  
atactgttctctagtagccgtagttaggccaccactcaagaactctgtagcaccgctacatacctcgtctgtaactcctgttaccagttggt  
gctgccagtgccgataagtcgtgtcttaccgggttgagctcaagacgatagttaccggataaggcgcagcggctcgggctgaacggggggttc  
gtgcacacagcccagcttgagcgaacgacctacaccgaactgagatacctacagcgtgagctatgagaaaagcgcacgcttcccgaag  
ggagaaagcggacaggtatccggaagcggcagggtcggaaacaggagagcgcacgaggagctccaggggaaacgcctggtatc  
ttatagtcctgctgggttgcaccctctgactgagcgtcgattttgtatgctcgtcagggggcgagcctatggaaaaacgccagcaacg  
cggccttttacggttctgctgcttggccttttgcctcactcattgatata



## Corresponding DNA origami designs and staple lists:

### 2.2.1.1 sc\_EGFP1 20HB-ext and 20HB-ext-W

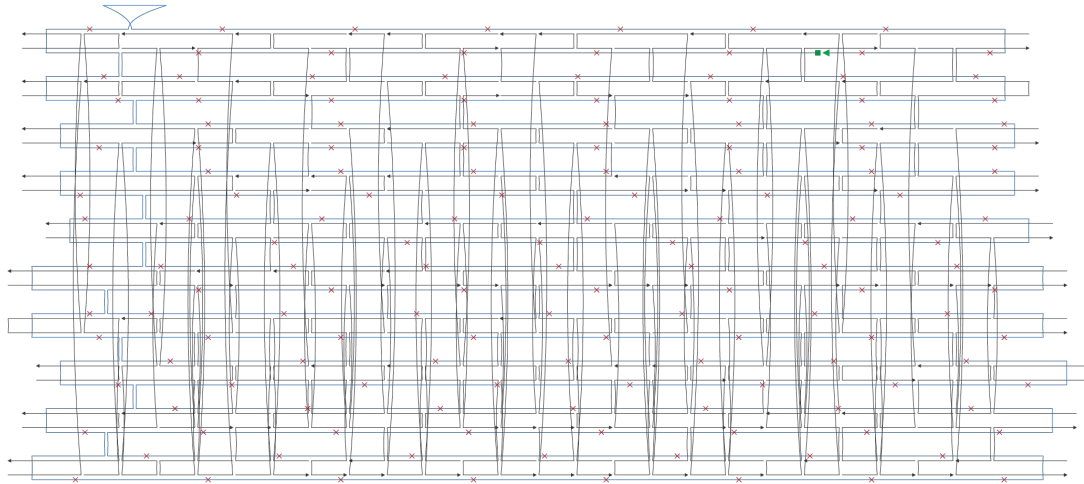

**Fig. S20 | Scaffold routing and staple design for sc\_EGFP1 20HB-ext and 20HB-ext-W.** Scaffold routing is shown in blue, staples are given in black, breakpoint for addition of sequence is marked by a green square (5') and arrow (3'). Design was prepared using caDNAo v0.1.

**Table S5 | Individual staple sequences for sc\_EGFP1 20HB-ext.**

| Name    | Sequence 5' - 3'                                      |
|---------|-------------------------------------------------------|
| core_1  | GGAAGCTCCCTCGTGCGGCGGGCCGGGCGACAACCACCG               |
| core_2  | GGACTATAAAGATACGGAACCTCCGGAAGGCTGCAAGCA               |
| core_3  | TCCGCCCCCTGACGAATAATCGTGCACCCGGGGTCT                  |
| core_4  | GCGTTTTTAATTCGCGTTAAATTTTATAAATAGCAGAA                |
| core_5  | ATTTACCAAGTCCCTATTGGCGTTGACGTC                        |
| core_6  | ATTGATTACACTTGATGTAAGTGTGCGATGTAC                     |
| core_7  | AAGGCCAGTAATGCCAGGCGGGCCCAAGTAGGGGTCTCCC              |
| core_8  | CGTCATTATTGACGTGTATTGATTTTGGTGCCAAAACAACTCCCATTACTATG |
| core_9  | TCAATGGAGTAAGTTATGTAACGCCAGGCGTT                      |
| core_10 | CGTAAATACTCCACCCCGTGAGACCGTACACGCCTACC                |
| core_11 | CAGTTTACGGCTATGAACTAATGAGTGGCGAA                      |
| core_12 | ATATGATACTATTAATAACTAGTCAGCATCAC                      |
| core_13 | GGGGCGTATAGCGAATAAGCCAGTAAGCAGAGCGGCCGTAAACTCCGCCTCC  |
| core_14 | GCTATCCACGCCCATTCAGTGGGAAAAAAG                        |
| core_15 | CCATGGTAACTTGGCTTTTCTACAAGTATTCTTGCCC                 |
| core_16 | TGGGGCGGAGTTGTTACACGCTGACCGTCGTGTACCGCGA              |
| core_17 | GCGTCAAAATGGGGTGGAGACTTGAAATCCATTGACGTTTTTGTAAAATGCC  |
| core_18 | GCCAGAGAGCTCTGCTGAACAGCATCAGTGGCCGAGCG                |
| core_19 | AGTCGTATGTGGAACGGTCATTGACGCGTATATCAATGA               |
| core_20 | TATAGTGAATCCAGAAGTTTTGGAAGCTTCGTCGTT                  |
| core_21 | CGCCGGACGACATTTTATCCGGAACATATTGGGCGGTCAGCCAGCTCTCCT   |
| core_22 | CCGTTTACGTCGCCGCCCCATTTCCGGTGGTT                      |
| core_23 | CCTTGCTACCATCTCGTGGGTTCCCTTTGATC                      |
| core_24 | CGAGGGTTGGGCACCACCCCGTTATATAGACGCGCAG                 |
| core_25 | AGCGGCTGAACCTTATGGTCTGACGAGTTGCCTTCAGCA               |
| core_26 | TGTGGCTTACCTTGATGCCGTTGGGGCAAAGTGTATAATCGGA           |
| core_27 | TGTAATCCAGCTTGTAGCTTGCCGCTCCAGATTCATCCA               |
| core_28 | GCCCCAGGCCGTCCTCGATGTTGTGGCACAGTCCGATCAGAGCTTG        |
| core_29 | ATGTTCCGTCCTCCTTGAAGTCGGTGGTCAACCGGAAGG               |
| core_30 | GGGTGTTTACGCTCGATGCGGTTACCCAGG                        |
| core_31 | CAGCACGGGGCCGTCTAGATTAACGATCAAGGGCGCTA                |
| core_32 | TCGGGCAGCTCGAATTCACCTCGGCGGGGAAGAAGTCTGTTGCCGAAATCAA  |
| core_33 | ACTGGGTGCTCAGGTAGTGTGATCTGGTATGACGCTGCG               |
| core_34 | GGCTGGCAACTAGAAGGCGGATCTCACCGGGTGGTG                  |
| core_35 | ATGCCGAGAGTGGTTGCTATTAATGTGCTGCTTGATGGATATCTGCAG      |

|          |                                                                     |
|----------|---------------------------------------------------------------------|
| core_36  | CCGGCGGCGCTGCTATTGTCTTCCCAATCCTAGCGGTCGCTTCATT                      |
| core_37  | GGTCAAGAAGCACTACACTCATGGTTACTA                                      |
| core_38  | ATTTTATTAGGAAAGGCCGATTTGTGTGTCAGCCGTAAGATAGTTGCCCTGGTAG             |
| core_39  | CGATGCAGATCAGCGAGCTCTAGGCGAGCTGCAGCCAG                              |
| core_40  | CCAGAATAATAGAATAGGGCCCTCGCCGATGGGGTCTGCAAGCACTG                     |
| core_41  | ACCACACCCCCAGCATGGTCACGAACCTCCAGTCTTTGCT                            |
| core_42  | TCACCCTAATCAAGTTTTATTGAACTCATAACGGGGTCTG                            |
| core_43  | CTATCAGGGCGATGGCATGAGCGGGGAATAA                                     |
| core_44  | AACGTCAAAAATAACAAAACAATATATG                                        |
| core_45  | TTTGGACAAGAGTCTTCCCGATCTTTTAC                                       |
| core_46  | AATCGGCAAAATCCCTTTGTTAATCTTACCG                                     |
| core_47  | TTTGAATGTATTTAGAAGGGCGAAGGTGAGTATTAGCTCCAATAAACCCAGCTG              |
| core_48  | GGGTTCCGCGCACATCACTATTAAGTGTATGACATGATCCAGAAGT                      |
| core_49  | AAAGTGCCAAAAATCGACGCTCAAGTCAGAGCCCCGTATTTACCAGATCTCA                |
| core_50  | ACCTAAATTGTAAGCTTGAGTGTGGCGTCACAGCTCCGATCCAGT                       |
| core_51  | GCGTTTCTGAGAATAAGAACGGAAGGGAAGAAAGCG                                |
| core_52  | CTGTGACTAAACCGTACGGGGAAAGCCGGCG                                     |
| core_53  | ATACGGGATCTAAAGTGACGCTCATAATTTTCGTGACTAATACGTAGATGTAAGTGCATTTACC    |
| core_54  | CCCCATGTGACACTGAATGACACCTACTCAGACAATGAACGTGG                        |
| core_55  | GTTCCCACTTGTACAGCTGTCCTGCCACCCACCCCAAAGGAGC                         |
| core_56  | CATCGTGGCTTTAAATTTTAAAGGATTTTG                                      |
| core_57  | TAGATAACTAATTCTGTTGAATAGCATTAGTTCCGACCCTGCCGCTTACCCT                |
| core_58  | TGACTCCACTTGTGGCAGATGAACCTCAGGG                                     |
| core_59  | GATCTGTGACACAGGAGGGCCAGGGCACGGGC                                    |
| core_60  | ATATATGAGCCAGTGTATGTGGTCCGGGTGTGTGCGC                               |
| core_61  | TTAAAAATGCACACTGGGCATGGCGGACTTGTCTTGTAG                             |
| core_62  | GGCAAACAACGGAAATCTTACTGTGTGAACCAACCCCTAAAGGGAGCCACAGTGG             |
| core_63  | CAATGGGCTCTTCTTAAAGAGTTGGGAGGGCACTCGCCCTCGCCCT                      |
| core_64  | TCCAGCTCTATTTGTTTTATCAGCTTCCGGTCCGAGGCTATTTTCTC                     |
| core_65  | AGTGGTCGCATTTAGTTGTGCAACGAGAAAGTGGACTCC                             |
| core_66  | TGTTCCAGGGGCGCTGGCAAGTGTCCCCCTTGCTCGTCC                             |
| core_67  | TAGACCGAGATAGGGGTTAATATACCCACTCAATGTCAACGTCAATA                     |
| core_68  | TCAGGGTTATTGTCTCCCACTACCATGCCATAAGTAAGGACCCACGCTTGAAGTGTGTAGT       |
| core_69  | TGCTTTTGCAAAAAAGATACATATCCCCCT                                      |
| core_70  | TAATACCGCGATGTATTTGTTAACCATAGGC                                     |
| core_71  | TTGGCCGCAACAGATGAGTGGCACCTTCCAG                                     |
| core_72  | AAAAGCGGCTCAACCATCTCAGCGCAGATTACCTCCCTCAAACC                        |
| core_73  | GGCGAGTTCCGGCGACCAGTTACCAGAAGATCTCTAGTTATGCCAAAACCGCATCA            |
| core_74  | AGGCACCTAAGTCATTTGGGTGAGACAAATAGACCCGACA                            |
| core_75  | AATGCTTATCCTCGCCACGCCGTAGGTGAGGATGCCCTCTGCTGGT                      |
| core_76  | AAAACCTATCCAGTTCGCCACATCAAAGAACGTAACC                               |
| polyT_1  | TTTTTGGAAACCGTAAAAAGGCCGCTTGTCTGGTGAGCACTGTTGAGACGTTAAG             |
| polyT_2  | TTTTTGCCTGGCGCTTTCTCATTCTCCCGCGGTGTTTCAATATTTTGGG                   |
| polyT_3  | TTTTTGTATCTCAGTTCGGTTAGCTCA                                         |
| polyT_4  | CAAGCTTGAAGTCCCATAAGGTCAATTTTTTTTTTGTACTGGGCACAAAAGGCCATTTTT        |
| polyT_5  | TTTTTTCGAGCTCGGTACGTATGAGATTATCAAATTTTT                             |
| polyT_6  | TTTTTTTTTTGGGCTGTGTGCTTATCTGCGCTCTGCTGATTTTT                        |
| polyT_7  | TTTTTGTCTCTGGACGTGATTAATCTAGATCC                                    |
| polyT_8  | TTTTTTTTTTTGAACCGCTGCGCCTTATCGGCCATGATATAGACGTTACGCTTGAATGA         |
| polyT_9  | TTTTTCGCTTCTCGTTGGGGCAGGACCACTACAGGTTAATGTC                         |
| polyT_10 | TTTTTCTTGAGTCCAACCCGGGGCACGGGGACTTCTGC                              |
| polyT_11 | TTTTTTCAGAAGCCATAGAGCCACCGCATCCGCCGCGC                              |
| polyT_12 | TTTTTGCAGCAGCCACTGGTAGAGGTGCCGTAGAATAAGACACGACTTATCGCCACTGTTTTT     |
| polyT_13 | TTTTTCAATAGGCCGAACATTCCGCCTTTTT                                     |
| polyT_14 | TTTTTTTCGGGGCGAAAACCTCCATTGGAAAACGTTCTTTTT                          |
| polyT_15 | TTTTTGAAGTGGTGGCCGTACAGGATTAGCAGAGTTTTTTTTTTCGAGGTATGATTCGGGAATTTTT |
| polyT_16 | TAATGGCAGCACTGCATACGATACGGTAGCTCTTGGAAAGTCCCGGTCGTTGCTCCAAGTTTTT    |
| polyT_17 | GTGCTCATTCAAGGAATCAGCTCATTTTTTAACTTTTT                              |
| polyT_18 | TGTCACGCAGAGTAAGCAGGGCGGTTGCCGTGCTCCTTGAAGAAGATGGTGCTTTTT           |
| polyT_19 | TTTTTGTGTTGCCATTGTGTGATCGTTTTT                                      |
| polyT_20 | TTTTTACAGTATTTGGTACCCGGCTACACTAGAAGATTTTT                           |
| polyT_21 | ATCTGGCCTTGTCCGGTAACTATCGTTTTTTT                                    |
| polyT_22 | CCAGTGTGCGGTAGGTGGCAGAACCCCGGTTCCAGCTTTTT                           |
| polyT_23 | TAGTTCGACGCTTCCGGCGCGGTTACTAGTGGATCTTTTT                            |
| polyT_24 | TTTTTAGGATCTTACAGTTTGCGCAACTTTTT                                    |
| polyT_25 | TTTTTAGCCAGTTACCGCTGTAGTTTTT                                        |
| polyT_26 | C TTCGGAACCTACAGAGTCTTTTTTT                                         |

**Table S6 | Individual staple sequences for sc\_EGFP1 20HB-ext-W.**

| Name    | Sequence 5' - 3'                                                          |
|---------|---------------------------------------------------------------------------|
| core_1  | tGGAAGCTCCCTCGTGCttGGCGGGCCttGGGCGActtAACACCGt                            |
| core_2  | tGGACTATAAAGATACttGGAACCTCttGGAAGGcttTGCAAGCAt                            |
| core_3  | tTCCGCCCCCTGACGttAATAATCttGTGCACCCttGGGGTCTt                              |
| core_4  | tCGTTTTTttAATTCGCGTAAATttTATAAAttAGCAGAAAt                                |
| core_5  | tATTTACcttAAGTCCCTATTGGCGttTTGACGTct                                      |
| core_6  | tATTGATTtCACTTGATGTACTGcttGATGTACT                                        |
| core_7  | tAAGGCCAGttTAATGCCAGGCGGGCCttCAAGTAGGttGGTCTCCct                          |
| core_8  | tCGTCATTATTGACGTttGTAtttTGATTTTGGTGCCAAAACAACTCCCAttTACTATGt              |
| core_9  | tTCAATGGAttGTAAGTTATGTAACGcttCAGGCGTTt                                    |
| core_10 | tCGTAAATACTCCACcttCCCGTGAGttACCGTACACGCCCTACct                            |
| core_11 | tCAGTTTACTttGGCTATGAACTAATGAttGTGGCGAAAt                                  |
| core_12 | tATATGATAttCTATTAATAACTAGTcttAGCATCAct                                    |
| core_13 | tGGGGGCGTttATAGCGAttATAAGCCAGTAAGCAttGAGCGGCCcttGTAAACTTttCCGCCTCct       |
| core_14 | tGCTATCCACGCCCAATTtCAAGTGGGttAAAAAAAGt                                    |
| core_15 | tCCATGGTAttACTTGGCttTTTTCTACTtAACTGATttTCTTGCCct                          |
| core_16 | tTGGGGCGGAGTTGTTAttCACGCTGAttCCGTCGTGttTACCGCGAt                          |
| core_17 | tCGCTCAAAttAATGGGGTGGAGACTTGGAAATCttCATTGACGttTTTTTGTttAAAATGCCt          |
| core_18 | tGCCAGAGAGCTCTGcttTGAACAGcttATCAGTttGCCGAGCGt                             |
| core_19 | tAGTCGTAttGTGGAACGttGTCATTGAttCGCGttTATATCAATGAt                          |
| core_20 | tTATAGTGAAttAATTCAttGAAGTTTTttGGAAGCTttTCGTCGTTt                          |
| core_21 | tCGCCGGAttCGACATttTTGATCCttGGAACATAttTTGGGCGGTTCAGCCAttGCTCTCCTt          |
| core_22 | tCCGTTTACGTGCGCCttGCCCATTTTtCGGTGGTTt                                     |
| core_23 | tCCTTGCTCACCATCTcttGTGGGTTcttCTTTGATct                                    |
| core_24 | tCGAGGGTttTGGGCACCACCCCGttTTATATAGttACGCGCAGt                             |
| core_25 | tAGCGGCTGttAACTTTAttGGTCTGAttCGAGTTGcttCTTCAGCAAt                         |
| core_26 | tTGTGGCTttTCACCTTGATGCCGTTttGGGGCAAAttAGTGTTAttAATCGGAt                   |
| core_27 | tTGTACTCCAGCTTGTttAGCTTGCCttGCTCCAGAttTCATCCAAt                           |
| core_28 | tGCCCCAGGttCCGTCTCGATGTTGttGGCACAGTttCTCCGATCttAGAGCTTGt                  |
| core_29 | tATGTTGCCGTCCTCCTTGAAGTcttGGTGGTCAttCCGGAAGGt                             |
| core_30 | tGGGTGTTttTCAGCTCGATGCGGTTtCACCAAGt                                       |
| core_31 | tCAGCACGGGGCCGCTcttTAGATTAAttACGATCAAttGGGCGCTAt                          |
| core_32 | tTCGGGCAGttCTCGAACTTCACTCGGCGCGGGttAAGAAGTcttTGTTGCCGttAAATCAAAt          |
| core_33 | tACTGGGTGCTCAGGttAGTGATcttTGGTATGttACGCTGCGt                              |
| core_34 | tGGCTGGCAACTAGAAttGGCGGAtttCTCACCGttGGTGGTGt                              |
| core_35 | tATGCCGAGttAGTGGTTGttCTATTAAttGTGCTGCTttTGATGGATATCTGCAGt                 |
| core_36 | tCCGGCGGcttGCCCTGCTATTGCTTCCCAATCctTAGCGGTCttGCTTCATTt                    |
| core_37 | tGGTCAAGttAAGCACTAttCACTCATGGTTAttCTAt                                    |
| core_38 | tATTTTATTAGGAAAGGttCCGATTTttGTTGTCAGttCCGTAAGAttTAGTTGCCttCTGGTAGt        |
| core_39 | tCGATGCAAttGATCAGCGAGCTTAGttGCGAGCTGttCAGCCAGt                            |
| core_40 | tCCAGAATAttATAGAATAGGGCCCTcttGCCGATGttGGTCTGcttAAGCACTGt                  |
| core_41 | tACCACACcttCCCAGCAttGGTCACGAActCCAGttCTTTGCTt                             |
| core_42 | tTCACCTAATCAAGTTttTTATTGAAttCTACAttGGGGGTCGt                              |
| core_43 | tCTATCAGGGCGATGGcttATGAGCGttGGGAATAAt                                     |
| core_44 | tAACGTCAAttAAAATAAttCAAAAACAttATATATGt                                    |
| core_45 | tTTTGAACAAGAGTcttTCCCCGAttTCTTTTACT                                       |
| core_46 | tAATCGGCAAAATCCcttTTTGTTAAttTCTTACCGt                                     |
| core_47 | tTTTGAATGTATTAGAttAGGGCGAAttGGTGAGTAttTTAGCTcttCAATAAACTtCACGCTGt         |
| core_48 | tGGGTTCCGCGCACAttCACTATTAttAGTGATGttACATGATcttCAGAAGTt                    |
| core_49 | tAAAGTGCCttAAAAATCGACGCTCAAGTCAGAGttCCCCGAttTTTCCACAttGATCTCAAt           |
| core_50 | tACCTAAATTGTAAGCttTTGAGTGTttGGCGTCAttCAGCTCCGttATCCAGTt                   |
| core_51 | tGCGTTTcttCTGAGAAAttAAGAACGttGAAGGGAAGAAAGCGt                             |
| core_52 | tCTGTGACTttAAACCGTttACGGGGAAAGCCGGCGt                                     |
| core_53 | tATACGGGAttTCTAAAGTttGACGCTCAttTAATTTCCttTGACTAATACGTAGATGTACTGcttATTACCT |
| core_54 | tCCCCATGttTGACACTttGAATGACACCTACTCAGACAAttGttAACGTGGt                     |
| core_55 | tGTTCCCAttCTTGACAttGCTGTCCTGCCCCACCCcttAAAGGAGct                          |
| core_56 | tCATCGTGGttCTTTAAAAttTTTTAAAttGGATTTTt                                    |
| core_57 | tTAGATAACttTAATTCTttGTTGAATAttGCATTTAttGTTCCGACCCTGCCGCTTACcttCTt         |
| core_58 | tTGACTCCttACTTGTGGttCAGATGAACTTtCAGGGt                                    |
| core_59 | tGATCTGTcttGACCAGGAttGGGCCAGGGCACGGGct                                    |
| core_60 | tATATATGAttGCCAGTttTCATGTGGTGGGGTttGTGTCCGct                              |
| core_61 | tTTAAAAAttGACACACTGttGGCATGGCGGACTTtGttTCTTGATGt                          |
| core_62 | tGGCAAACAttACGGAAttCTTACTGttGTGAACAttACCCTAAAGGGAGCCcttACAGTGGt           |
| core_63 | tCAATGGGcttTCTTCCttAAAGAGTttGGGAGGGttCACttTCGCCCTCGCCctt                  |

|          |                                                                               |
|----------|-------------------------------------------------------------------------------|
| core_64  | tTCCAGCTCttATTTTCGttTTTATCAGttCTTCGGTCttCGAGGCTttATTTCTCt                     |
| core_65  | tAGTGGTCGttCATTTAGGttTTGTGCAAAtCGAGAAAGttTGGACTCCt                            |
| core_66  | tTGTTCAGttGGGCGCTGGCAAGTttTCCCCCTttGCTCGTCCt                                  |
| core_67  | tTAGACCGAGATAGGttGTTAATAtttACCCACTCttAATGTCAAttCGTCAATAt                      |
| core_68  | tTCAGGGTTATTGTCTCttCCACTAChCATGCCAtttAAGTAAGttGACCCACGttCTTGAAGTttGTTGTAGTt   |
| core_69  | tTGCTTTTTtGCAAAAAAtGATACATAtttCCCCCTt                                         |
| core_70  | tTAATACCGttCGATGtAtttTTGTTAAAtCCATAGGct                                       |
| core_71  | tTTGGCCGctCAACAGAtttGAGTGGCACCTTCCAGt                                         |
| core_72  | tAAAAGCGGttCTCAACctAtCTCAGcttGCAGATTttACCTCCctTCAAACct                        |
| core_73  | tGGCGAGTTttCGGCGACTtCAGTTACcttAGAAGATCttTCTAGTTAttTGCCAAAACCGCATCAAt          |
| core_74  | tAGGCACCTttAAGTCATTttTGGGTGAGttACAAATAGttACCCGACAt                            |
| core_75  | tAATGCTTAttTCCTCGcttCACGCCGTAGGTGAGttGATGCCCTttCTGCTGGTt                      |
| core_76  | tAAAACtCttATCCAGTTttCGCCACAtttCAAAGAAttCGTAACct                               |
| polyT_1  | tttttGGAACCGTAAAAAGCCGCTTGTGcttGTGAGCAAAtCTGTTGAGttACGTTAAGt                  |
| polyT_2  | tttttCGTGGCGCTTTCTCAAttTTCTCCcttGGCGGTGttTTTCAATAttTTTTGGGt                   |
| polyT_3  | tttttGTATCTCAGTTCCGGTttTAGCTCAAt                                              |
| polyT_4  | tCAAGTTGttAAAAGTCCCATAAGGTCAttttttttGtACTGGGCAttCAAAGGCCAttttt                |
| polyT_5  | tttttCGAGCTCGGTACTtGTCATGAGATTATCAAAAttttt                                    |
| polyT_6  | tttttttCTGGGCTGTGTGttCTTttATCTGCGCTCTGCTGAttttt                               |
| polyT_7  | tttttGCTCCTGGACGttCAGTTAATttCTAGATCCt                                         |
| polyT_8  | tttttttCCGACCGCTGCGCCTTAttTCGGCCATGATATAGACGttTCAGCTtttGCAATGAt               |
| polyT_9  | tttttCGCTTCTCGTTGGGGttCAGGACAttCTACAGGttTTAATGTCt                             |
| polyT_10 | tttttCTTGTAGTCCAACCCGGttGGCACGGGGGAttCTTCTGct                                 |
| polyT_11 | tttttTCAGAAGCCATAGAGCCCACCGCATcttCGCCGCGct                                    |
| polyT_12 | tttttGCAGCAGCCACTGGTAttGAGGTGCCGtAttGAAttTAAGACACGACTTATCGCCACTGtttt          |
| polyT_13 | tttttCAATAGGCCGAttACATTCCGCCttttt                                             |
| polyT_14 | tttttTTCGGGGCGAAAACtCttCATTGGAAAACGTTCCtttt                                   |
| polyT_15 | tttttGAAGTGGTGGCCttGTCttACAGGATTAGCAGAGtttttttCGAGGTATGTAttTTCGGGAAAttttt     |
| polyT_16 | tTAAAttTGGCAGCACTGCAttTACGATActtGGTAGCTCttTGGAAAAGTCCCgttGGTCGTTGCTCCAAGttttt |
| polyT_17 | tGTGCTCAttTCAAGGAttATCAGCTCAttTTTTTAACttttt                                   |
| polyT_18 | tTGTACGcttAGAGTAAGttCAGGGCGGttTTGCCGTCGTCCTTGAAGAAGATGGTGCttttt               |
| polyT_19 | tttttGTTGTTGCCATTGttTGTGATCGttttt                                             |
| polyT_20 | tttttACAGTATTTGGTttACcttCGGCTACACTAGAAGAttttt                                 |
| polyT_21 | tATCTGGCCttTTGttTCCGGTAACTATCGTttttt                                          |
| polyT_22 | tCCAGTGCttGCCGTAGGTGGCAAttGAACCCCCCGTTTCCAGCttttt                             |
| polyT_23 | tTAGTTCGcttAGCCTTCGttGCGGCCGTTACTAGTGGATCttttt                                |
| polyT_24 | tttttAGGATCTTCActtAGTTTGCgCAACttttt                                           |
| polyT_25 | tttttAGCCAGTTACTtCGCTGTAGttttt                                                |
| polyT_26 | tCTTCGGAAttCTACAGAGTTCTTttttt                                                 |

### 2.2.1.2 sc\_EGFP1 20HB-int and 20HB-int-W

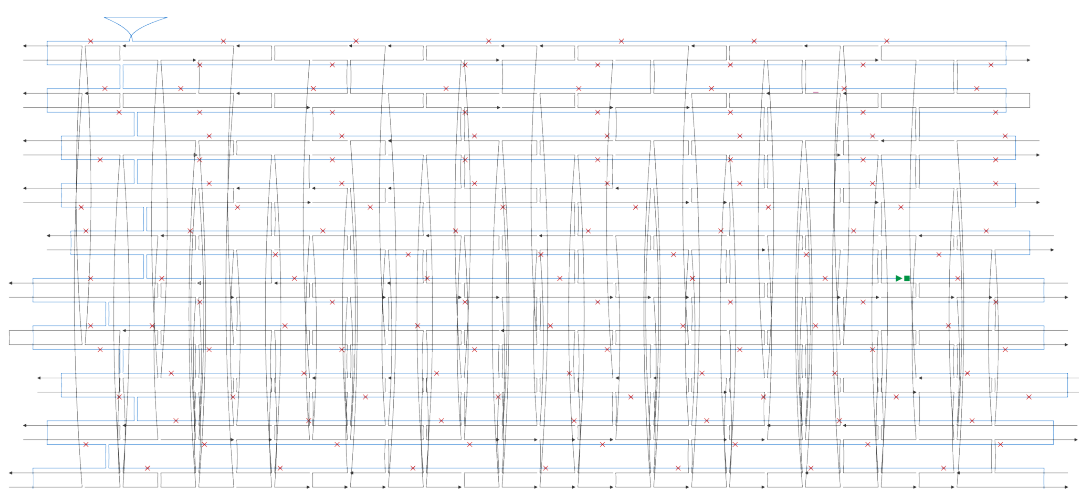

**Fig. S21 | Scaffold routing and staple design for sc\_EGFP1 20HB-int and 20HB-int-W.** Scaffold routing is shown in blue, staples are given in black, breakpoint for addition of sequence is marked by a green square (5') and arrow (3'). Design was prepared using caDNAo v0.1.

**Table S7 | Individual staple sequences for sc\_EGFP1 20HB-int.**

| Name    | Sequence 5' - 3'                                              |
|---------|---------------------------------------------------------------|
| core_1  | GGCAAATCCCTTATAGAGCAAATTAATTTCCCAATCC                         |
| core_2  | AGTCAATTTTTAACAAAGGGAACCAAGCTCCACCCC                          |
| core_3  | GTGCCACCTAAATTGGAAGCATTGATGGATAGGAAAG                         |
| core_4  | CACATTTCACTTGGAAATCCCCGATGGTAATACTTGTG                        |
| core_5  | ACAGGAAGAGATCCAGTTCGATTGGTCT                                  |
| core_6  | TACTCTTCAAAGTGCTCATCATTGCACTGC                                |
| core_7  | ATATTTGAGACCGAGTTGCTCTTACTCAACCATTAATTG                       |
| core_8  | CCCACTGATCTTCATCAATGTTGTGCAAAAAGCGGTTAGCTCCTGTAACCCA          |
| core_9  | CCGCTGTTGGCAAATGCCGCAAACAATAGGC                               |
| core_10 | GGCGAAAACCTCTCAAGGCCGAGCTCGTCGTTTGGTATG                       |
| core_11 | TTCTTCGGGACACGGAAATGTTGAAAATTTTT                              |
| core_12 | GAACTTTACTTTTTCAATATTATTTAAGCGTT                              |
| core_13 | CCGCGCCACCGTAAGGTTTCGCCAGTTAATACTCCAGATATAGAATAGTTCACCT       |
| core_14 | ACTCATGGTTATGGCAGGAAAACGACCTACTC                              |
| core_15 | CATGCCATCATAGCAATTTTATTATCTGCACGTAGGTG                        |
| core_16 | GGTTCCTAACGATCAACCTGACTCGCGCTTCTCAGCAGCA                      |
| core_17 | CAGCTCCCCGATCGTTGTCAGAAGTAAGTTGGATCTTATGCCCCACTGGGTCTC        |
| core_18 | TGCCATTGCTACAGGGCAATGATGCTCGTCTGCCGTCC                        |
| core_19 | GAAGCTAGGAGTGGCATCAATACGTTATTGTCTCATGA                        |
| core_20 | TTGCCGGCGAAGGGATCAGCGGCCATGATGCCCTTC                          |
| core_21 | ATAGTTGGGCGAGTGCCTGCTCTCGTGACCAGCGTTTCTGGGTAATCAAAA           |
| core_22 | GTAGATAACTACGATGCTTCATTTGCTGTCC                               |
| core_23 | GACCCACGCTCACCGGGTTTGCGCATTTCCCTC                             |
| core_24 | AGTATATTCTGGCCCCAGTGCTCATCGTGGAGAATGAC                        |
| core_25 | ATCCTTTTATCTTGAAGGGCCCTCAGCTTGCGAATTCCA                       |
| core_26 | CTGAAGCAACTACGGGTACACTACCCCTGGAAGAAGTCGACGTCA                 |
| core_27 | TTCGGAAAAAGAGTTTGACAGTTTGGGGGTGAACTCCAG                       |
| core_28 | GGTAGCTCCGGTGCTACAGAGTTCTTCCGACCCCTGGACGTCTATGGGA             |
| core_29 | TTGATCCGGCAAACAAACCACCGCAATCTAACTGCACGC                       |
| core_30 | GCCACTGGGTGGTTTTTTTGTGTTGCAAGCA                               |
| core_31 | ACGACTTATCGCCACTCTCATATCGAAGTTGGGCCATT                        |
| core_32 | GGTAAGACCCGCGCAGAAAAAAGGATCTCAACATGAGATGCTTGTGAGCTCTA         |
| core_33 | AACATCGTCTTGAGCGGTGTAAGCTCGAAGTCCATA                          |
| core_34 | TCTGCGCTCTCCTGTTGAAGTTCCGCGAACCAATG                           |
| core_35 | TCTCAGTTTCCAACCCGTTCTTCTTATCAAAAACAATAAACAGCCAGC              |
| core_36 | GGTCGTTCCAATGAGTGAGCAAAGGCCAGCAACGCGGATGCGGTTCC               |
| core_37 | CTATAAACACCCATTGTGCTGCTTCATGCT                                |
| core_38 | AATCGACGCTCAAGTCCGGCTTAAGCCTTCGGGTCAGGGCAGGACCATCCCCCT        |
| core_39 | GACGAGCTTACCGGATACCTGTGACGAGGTCCGGCAG                         |
| core_40 | GCTGGCGTGGGAAGCGTGGCGCTTTGGCAGCATGTGGCGGAAATTA                |
| core_41 | TATGAACTGCGTATATGCTCCAAGCTGGGCTCTGCGCCT                       |
| core_42 | GATGTAAGTCCAAGTGGAGCTCTGAGTGGGTACTTTCA                        |
| core_43 | ATAGGGGGCGTACTTGACGCCTAGAGTCGTA                               |
| core_44 | GCCATTTAGAGTTGTGCTCGGTATAAGGGC                                |
| core_45 | GTCCATAAGGTCATTGATTTGGCACACTG                                 |
| core_46 | CAAAACCGCATCACCTGAGTCAACTCCTCGC                               |
| core_47 | TTGCGTCAATGGGGCGCCGTCATTGCCAGGGCGAAGATGGTAGTGGTATGTAGG        |
| core_48 | TTTGGAAAGTCCCGTACTGGGGATGAACTCGGGTCTCGATGT                    |
| core_49 | GTGCCAAAAATTTTTGTTAAAATTCGCTTATACTCAGCGCCGTAGACAAT            |
| core_50 | ACAAACTCCCATTGAACTGCCAAGCATCGCACCAGGGTTGATGCC                 |
| core_51 | TACTAGTGTGGTGCACATAATGGGTGCTTGGGCGGTC                         |
| core_52 | GAGGGTGGGACGTCAACATACGTCATTATTG                               |
| core_53 | CCTCGCCCGCATTTAGGACAGTGGAGTAAGTAATGCTTTTCTGTGACTGGTGGTCCCGGCG |
| core_54 | TTGTAGTTCCTTCTTTTCCATAGGCTCCGCCCCCTACGTCAA                    |
| core_55 | GTGCCCCGCTCACGCAGGAACCGTAAAAAGGCCGCTTAGCCAGGC                 |
| core_56 | TCCTCCTTGCCGTTTAGGCACAGGAAGGCAC                               |
| core_57 | CGTTGGGGCGGCTGACAGTAAGCCTTATATGAATAGACCGAGATAGGGTTGTT         |
| core_58 | TGTGATCCCCGTCGCTTAATCAGTGAGGCA                                |
| core_59 | CCGGCGGCGCTTACCAATGAGTAAACTTGGTC                              |
| core_60 | GTGACACTTTATCAGAGGATCTTCACTAGGCAGATTA                         |
| core_61 | TCGAGGCTGCCGAGCGTTAAGGGATTTTGGTGAAGATCC                       |
| core_62 | ATTGCTTCGATAAGCAGCACTGCATACACTTATGGAAAGTCCCTATTAGAGGTG        |
| core_63 | GCATCTTTTCTTAGTACCGCATCCAGGGCGCCATTTTCGTTTCATCC               |
| core_64 | ACGGGAGGGGTACGTTCTGCTGGTGGCTCCTGCCGCATCACAAA                  |
| core_65 | ATTAGCAGCGCTTTCTGCCGTCGTGGGCGGGCCAGGCGG                       |

|          |                                                                       |
|----------|-----------------------------------------------------------------------|
| core_66  | GTAGGAAATACCGTAAGTTATGTAAAAGGCCTGTAGGTA                               |
| core_67  | CTAATACGTAGATGTCGTCGAATGCGCCAGTGTATCAGGGGATAATA                       |
| core_68  | AGACCTCCCACCGTACGCATATGACGCCGTAGGCATGGCGGGGCCGGGTGGCCTCAGTTACC        |
| core_69  | TGGTACCCTATAGTCCGCCATCGAAATC                                          |
| core_70  | TCGCCGAGAGCGGCGGGTGGAGCCCCGAAAA                                       |
| core_71  | CGGACTTGAAGCTCCCGCAAACCCGACAGGA                                       |
| core_72  | TCCTTGAAACGGGCAGAGTGATCCCAGAATTGTCACGTGTTATC                          |
| core_73  | CACCTCGGTACGGGTCTAGATTAGCGATGCAAACGTTGTATAATTCTCTTACTGT               |
| core_74  | CATGCCGAGCTTGCCGGGATCCGATACGACATGTTAAATC                              |
| core_75  | CTTTGACAACCGCAAATGAAGTTTTAAATCTGGTAGCGTAACAGG                         |
| core_76  | CCTTCCAACCATCTCCACGCTGAAGCGATGATATGGGC                                |
| polyT_1  | TTTTTAAAAATAAACAAATAGGGGTTCCGCGGCGGATACCCTTGCTCGGGTCAAG               |
| polyT_2  | TTTTTTATTAAGAAGCTGGAGGAACAAGCGGGCGTAGCCAGAGGCAGTT                     |
| polyT_3  | TTTTTGCGAAAAACCGTCTACTCCAAC                                           |
| polyT_4  | TCCAGTCTAAGTCATTCTGAGAATAGTTTTTTTTTTGTATGCCGGCATGTATTTAGTTTT          |
| polyT_5  | TTTTTATCCGCCTCCAGGGGAGGGGCAAACAACCTTTTT                               |
| polyT_6  | TTTTTCGTAACCATCAGACAATGTCACATTCCGCCTTTTT                              |
| polyT_7  | TTTTTCAGTGAACGAAGTTGTAGTAAGTAGAA                                      |
| polyT_8  | TTTTTGGTCGAGGTGCCGTAAAATTTGGTATCTGCGCTCTGCCTATCTTGTCCGGG              |
| polyT_9  | TTTTTCGTTACGCCGACCGGTGTGCAGTTGCCGCGTAATTG                             |
| polyT_10 | TTTTTCTAAAGGGAGCCCCACCAGCGTTTGAAGAAC                                  |
| polyT_11 | TTTTTATACTAGTCAATAATCAATGTCAACAATGACCC                                |
| polyT_12 | TTTTTCCGGCGAACGTGGCGACGTAATAACTCGATGATTTAGAGCTTGACGGGGAAAGTTTT        |
| polyT_13 | TTTTTTGATGTACTGCATTACTATTTTT                                          |
| polyT_14 | TTTTTATGGGCACCACCCCGGTCCAGCTCGACCAGTTTTT                              |
| polyT_15 | TTTTTAAGTGTAGCGGTTACGAAAGGAAGGGAAGATTTTTTTTTTAAGCGAAAGGAGAGTCCACTTTTT |
| polyT_16 | CACGTGGTCGGGGTAGTCTTTGCTCCCAGCATTACATGATCCCCGGGCGATGGCCCACTATTTTT     |
| polyT_17 | CGTCGCCGTGAACAGACCGCTATCCACGCCATTTTTT                                 |
| polyT_18 | GAAGTCGATATAGACGTATCCGGTTTTGATCTTTTCTACGGGGTCTGACGCTTTTTT             |
| polyT_19 | TTTTTTGTGCCCCAGGATGAACCCCTTTTT                                        |
| polyT_20 | TTTTTCCCGCCGCGCTTTGGGCGCGTAACCACCATTTTTT                              |
| polyT_21 | GTGCTCAGAGTGCACATAATCGGAACCTTTTT                                      |
| polyT_22 | GTAGTGGTCAGCGATCTGTCTTAATCAAGTTTTTTGGTTTTT                            |
| polyT_23 | TTGTGGCTAACTCACGCAGAAGTGGTCCGTGCAACTTTTTTT                            |
| polyT_24 | TTTTTAGATGGCTGGCTGTACTCCAGCTTTTTT                                     |
| polyT_25 | TTTTTTCAGAAGCCAGTCAAAGGTTTTT                                          |
| polyT_26 | TAGAGCCCCTAGGGCGCTGGCTTTTT                                            |

**Table S8 | Individual staple sequences for sc\_EGFP1 20HB-int-W.**

| Name    | Sequence 5' - 3'                                            |
|---------|-------------------------------------------------------------|
| core_1  | tGGCAAATCCCTTATAttGAGCAAAAtTTAATTTtCCCAATCct                |
| core_2  | tAGCTATTTTTTAACtAAAGGGAAtCCAAGCTtCCCACCCct                  |
| core_3  | tGTGCCACCTAAATTGtGAAGCAAtTGATGGATtAGGAAAGt                  |
| core_4  | tCACATTTctACTTGGAAATCCCCGtATGGTAATtACTTGTgt                 |
| core_5  | tACAGAAAtGAGATCCAGTTCGATtTCGGTCCct                          |
| core_6  | tTACTCTTctAAAGTGCTCATCATTtGCACTGct                          |
| core_7  | tATATTTGAtGACCGAGTTGCTCTGtACTCAACCtATTAATTGt                |
| core_8  | tCCCAACTGATCTTCAAtTCAAtATGTTGTGCAAAAAGCGTTAGCTCcttGTAACCCAt |
| core_9  | tCCGCTGTTtGGCAAAATGCCGCAAAAtCAATAGGct                       |
| core_10 | tGGCGAAAACCTCAAtGGCCGCGAGtCTCGTCGTTTGGTATgt                 |
| core_11 | tTCTTCGtGACACGGAAATGTTGAtAAATTTTTt                          |
| core_12 | tGAACTTTAttCTTTTTCAATATTATTtAAGCGTTt                        |
| core_13 | tCCGCGCCAtCCGTAAGtGTTCCGAGTTAATtCTCCAGATtATAGAATtGTTACCCt   |
| core_14 | tACTCATGGTTATGGCAAtGGAAAACGtACCTACTct                       |
| core_15 | tCATGCCAttCATAGCAAtATTTTATTtATCTGCAAtCGTAGGTgt              |
| core_16 | tGGTCCCAACGATCAAtCCTGACTctGCGCTTctCAGCAGCAAt                |
| core_17 | tCAGTCCtCCGATCGTTGTCAGAAGTAAGTTtGGATCTTAtTGCCCCACtTGGGTCTct |
| core_18 | tTGCCATTGCTACAGGtGCAATGATtGCTCGTctTGCCGTCct                 |
| core_19 | tGAAGCTAGtGAGTGGCAAtTCAATACGtGTTATTGTCTCATGAt               |
| core_20 | tTTGCCGtCGGAAGGtGATCAGCGtGCCATGAtTGCCCTTct                  |
| core_21 | tATAGTTGtGGCGAGtGCCTGCTtCTCGTGCAAtCCAGCGTTTCTGGGtAATCAAAAt  |
| core_22 | tGTAGATAACTACGAttGCTTCATTtTGCTGTCCct                        |
| core_23 | tGACCCACGCTCACCGGtGTTGCGctATTTCCCTct                        |
| core_24 | tAGTATAtTCTGGCCCCAGTGTctCATCGTGGtAGAATGACt                  |
| core_25 | tATCCTTTTtATCTTGAAtGGGCCctCAGCTTGTtGAATTCcAt                |
| core_26 | tCTGAAGctAACTACGGCTACACTAtCCCCCTGGtAAGAAGTctGACGTCAAt       |

|          |                                                                          |
|----------|--------------------------------------------------------------------------|
| core_27  | tTTCGGAAAAAGAGTtTGACAGTtTGGGGGTGtAACTCCAGt                               |
| core_28  | tGGTAGCTCtCGGTGCTACAGAGTtCtTTCCGACCtCTGGACGTtCTATGGGAt                   |
| core_29  | tTTGATCCGGCAAACAAACCACCGtCAATCTAAAtCTGCACGct                             |
| core_30  | tGCCACTGtGGTGGTTTTTTGTTTGAAGCAt                                          |
| core_31  | tACGACTTATCGCCACtTCTCATAtTCGAACTtTGGGCCATTt                              |
| core_32  | tGGTAAGACtCGCGCAGAAAAAAGGATCTCAAtCATGAGATtGCTTGTCGtAGCTCTAt              |
| core_33  | tAACTATCGTCTTGAGtCGGTGtAGCTCGAtACTCCATAt                                 |
| core_34  | tTCGTGCGCTCTCCTGtTTGAAGTtTCGCCGAtACCAATGt                                |
| core_35  | tTCTCAGTtTCCAACCCtGTTCTTtTATCAAAAtCAATAACCAGCCAGct                       |
| core_36  | tGGTCGTTctCAATGAGTGAGCAAAGGCCAGctAACGCGGAtTGCAGTct                       |
| core_37  | tCTATAAAAtCACCCATTtGTGCTGCTTCATtGCTt                                     |
| core_38  | tAATCGACGCTCAAGTctGGCGTtATAGCCTTCGtGGTCAGGGtCAGGACCAAtTCCCCCTt           |
| core_39  | tGACGAGctTTACCGGATACCTGTctAGCGAGGTtCGGCGAGt                              |
| core_40  | tGCTGGCGTtGGGAAGCGTGGCGCTtTGGCAGCAAtTGTGGCGGtAAATTAAt                    |
| core_41  | tTATGAACTtGCGtTATAtGCTCCAAGCTGGGCTtCTGCGCTt                              |
| core_42  | tGATGTACTGCCAAGTgGAGCTCTGtAGTGGGTtACTTTCAAt                              |
| core_43  | tATAGGGGCGTACTTgGtACGCCAtAGAGTCTGAt                                      |
| core_44  | tGCCATTTAtGAGTtGtGCTCGGAtTAAGGGct                                        |
| core_45  | tGTCCATAAGGTCAAtTGATTTTgGtGCACACTGt                                      |
| core_46  | tCAAACCGCATCACctTGAGTCAAtCTCCTCGct                                       |
| core_47  | tTTGCGTCAATGGGGCGtCCGTCATTtGCCAGGGctGAAGATGtGTAGTGGTtATGTAGGt            |
| core_48  | tTTTGGAAAGTCCCGTtGTAAGTGGtGATGAActtCGCGGGTctTCGATGt                      |
| core_49  | tGTGCCAAAtAATATTTGTTAAAtTCGCGTtATACTCAAtGCGGCGTtAGACAAt                  |
| core_50  | tACAAACTCCAtTGAAtACTGCCAAtGCATCGctACCAGGGtTGATGCCt                       |
| core_51  | tACTAGTtGTGGTGCAAtCATAATGtGGTCGTTGGGCGGTct                               |
| core_52  | tGAGGGTGGtGACGTCAAtACATACGTCAATTtGt                                      |
| core_53  | tCCTCGCCctGCATTTAGtGACAGTGGtAGTAAGTAtATGCTTTTCTGTGACTGGTgAGTtCCCGGCGt    |
| core_54  | tTTGTAGTtTCCCTTctTTTTCCATAGGCTCCGCCCCCTtACGTCAAt                         |
| core_55  | tGTCGCCctGCTCACGctAGGAACCGTAAAAAGCCCGGTtAGCCAGGct                        |
| core_56  | tCCTCCTtTGGCGTTAtGGCACAGtGAAGGCAt                                        |
| core_57  | tCGTTGGGctCGGCTGAtCAGTAAGctCTTATAtGAATAGACCGAGATAGGGTtTt                 |
| core_58  | tTGTGATctCCCGTCTtCTTAATCAGTGAGGCAAt                                      |
| core_59  | tCCGGCGGctGCTTACCAtATGAGTAAACTTGGTct                                     |
| core_60  | tGTGACACTtTTATCAGtAGGATCTTACCTAGtGCAGATtAt                               |
| core_61  | tTCGAGGctTGGCCGAGCGtTTAAGGGATTTGGTtGAAGATCCt                             |
| core_62  | tATTGTCTtCGATAAGctAGCACTGctATACACTtATGGAAAGTCCCTATtAGAGGTGt              |
| core_63  | tGCATCTtTCTCTAGtACCGCATctCAGGGCGtCCctATTTCTGTTCACTct                     |
| core_64  | tACGGGAGGtGGTCAGctTCTGCTGtGTGCGCTctCTGCCGctATCACAAAt                     |
| core_65  | tATTAGCAGctCGCCTTctTGCCGTCGtTGGGCGGctCCAGGCGGt                           |
| core_66  | tGTAGGAAAtTACCGTAAGTTATGtAAAAGGCCctTGTAGGTAt                             |
| core_67  | tCTAATACGTAGATGtCGTCAATGtCGCCAGTtTATCAGGtGGATAAAt                        |
| core_68  | tAGACCTCCACCGTACTGCTATGtACGCGTAtGGCATGtCGGGCCGtGGTGGCCTtCAGTTACct        |
| core_69  | tTGGTCActCCTATAGtCCGCCAtCGAAATct                                         |
| core_70  | tTCGCCGAtGAGCGGctGGGTGGAGtCCCCAAAAAt                                     |
| core_71  | tCGGACTTgTtAAGCTCCctGCGAAACCCGACAGGAt                                    |
| core_72  | tTCTTGAAtACGGGCAAtGAGTGATctCCAGAAtTGTACAGctTGTTATct                      |
| core_73  | tCACCTCGGtTCAGGGTctTAGATtAGCGATGCAAtAACGTTGtATAATTCTCTTACTGt             |
| core_74  | tCATGCCAtGCTTGGCGtGGATCCGAtTACGACATtGTTAAATct                            |
| core_75  | tCTTGACAtACCCGAAtAATGAAGTTTTAAAtCTGGTAGctGTAACAGGt                       |
| core_76  | tCCTTCAAtACCATCTctCACGCTGAtAGCGATGAtTATGGGct                             |
| polyT_1  | ttttAAAAATAAACAAATAGGGGTCCGCGtGCGGATACtCCTTGCTctGGGTCAAGt                |
| polyT_2  | ttttTATTAAGAACGTGGAtGGAACAAtGCGGGCGtTAGCCAGAtGGCAGTt                     |
| polyT_3  | ttttGCGAAAAACCGTCAAtCTCCAAt                                              |
| polyT_4  | tTCCAGTCTtAAGTCACTGAGAATAGtttttttTGTATGCGGctATGTATTTAGtttt               |
| polyT_5  | ttttTATCCGCCTCCAtGGGGGAGGGGCAACAACtttt                                   |
| polyT_6  | ttttttCGTGAACCATCAAtGACtAATGTACATTCGCCtttt                               |
| polyT_7  | ttttCAGTGAACGAAtGTTGTAGtAACTAGAAt                                        |
| polyT_8  | ttttttGGTTCGAGGTGCCGTAAtATTTGGTATCTGCGCTCTGtCCTATCTtTGTCGGGt             |
| polyT_9  | ttttCGTTCAGCCGACCGtGTGTGCActGTTGCCGctCGTAATTGt                           |
| polyT_10 | ttttCTAAAGGGAGCCCCctACCAGGCGTTtGAAGAAct                                  |
| polyT_11 | ttttATAACTAGTCAATAATCAATGTCAACtAATGACCCt                                 |
| polyT_12 | ttttCCGGCGAACGTGGCGAtCGTAAATACTctGATtGATTTAGAGCTTGACGGGAAAGtttt          |
| polyT_13 | ttttTGATGTACTGctATTACTATtAtttt                                           |
| polyT_14 | ttttATGGGCACCACCCCGGtTCCAGCTCGACCAGGtttt                                 |
| polyT_15 | ttttAAGTGTAGCGGtTACTtGAAAGGAAGGGAAGAttttttAAGCGAAAGGAtGAGTCCACtttt       |
| polyT_16 | tCACTGTTGGTCGGGGTAgTtCTTTGCTtCCCAGCATtTACATGATCCCCctGGGCGATGGCCCACTAtttt |
| polyT_17 | tCGTCGCGGtTGAACAGtACCAGTtACCAGCCCCAtttt                                  |
| polyT_18 | tGAAGTCGAtTATAGACGtTATCCCGTtTTTGATCTTTTCTACGGGGTCTGACGCTtttt             |
| polyT_19 | ttttTGTGCCCCAGGAtGAACCCCTttt                                             |

|          |                                             |
|----------|---------------------------------------------|
| polyT_20 | tttttCCCGCCGCGCTTtTGgttGCGCGTAACCACCACAtttt |
| polyT_21 | tGTGCTCAGtAGTtGCACTAAATCGGAACtttt           |
| polyT_22 | tGTAGTGGTtCAGCGATCTGTCTtTAATCAAGTTTTTGGtttt |
| polyT_23 | tTTGTGGCTtAACTCAGGtCAGAAGTGGTCCTGCAACTTtttt |
| polyT_24 | tttttAGATGGCTGGCtTGTACTCCAGCTtttt           |
| polyT_25 | ttttTCAGAAGCCAtGTCAAAGGtttt                 |
| polyT_26 | tTAGAGCCctTAGGGCGCTGGCtttt                  |

### 2.2.1.3 sc\_EGFP1 32HB

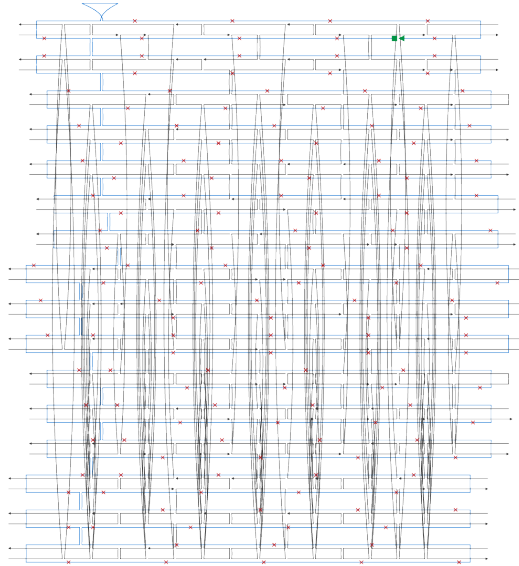

**Fig. S22 | Scaffold routing and staple design for sc\_EGFP1 32HB.** Scaffold routing is shown in blue, staples are given in black, breakpoint for addition of sequence is marked by a green square (5') and arrow (3'). Design was prepared using caDNAo v0.1.

**Table S9 | Individual staple sequences for sc\_EGFP1 32HB.**

| Name    | Sequence 5' - 3'                                        |
|---------|---------------------------------------------------------|
| core_1  | GAACCGTACCACTACGTGAACCATGCCGTAAA                        |
| core_2  | ACCGTAAGTTATGTACTGCATTTACCGTCATTGACGTCAATAGGGGGCCAGGCG  |
| core_3  | GGCGTTACCAAAAAGGTTTTGTTACCTAAATGCACTAAAAGCCATAGAGCCCACC |
| core_4  | GCGTACTTCATAAGGTCATGTACTTTGGTGCCTGCTTAATGACTCCTATTATTG  |
| core_5  | CAAGTAGCGAAAACGGGCGGGGATTACTATTAATAACTTTCCATAG          |
| core_6  | TACGTAGATGTACTGCATGGGGTGATATGAGTGGGAGGGTGTGAAGTGCACCC   |
| core_7  | AATAGCGAGAGATTATTATGGGAATCAACGCGTATATCAA                |
| core_8  | ACCGCATCACCATGGTCAAACCGAAAAATGACAATGATACGCAAAATTTACCA   |
| core_9  | TGGGTTCTCTAGTTAGAGTGAGTCAGATTTATTGGTATG                 |
| core_10 | CTCTGATGGATATCTGCAGAATTGGGGCGGATAGTTGCCTCAGTGAG         |
| core_11 | CCAGCACATTATCCGCGTTAATAATCATTGGGCACTGCA                 |
| core_12 | CTGGCGGCTCGCCCTTGCTCACTGGGCCAGCCGATCGT                  |
| core_13 | GCTTGGGTCTCCCTATCCAGAGAAGTGTGAGTTTTAAAGTGCC             |
| core_14 | TTGTGGCCGTTTACGTGTGGCATATCAAGG                          |
| core_15 | GCAGCTTGCCGGTGGTCCCCTGTGCCATTGAGCGCAGCCACTCTACTCATA     |
| core_16 | GCAGATGGTGCAAAAGGTTACCTGCTTGTCCGCCATG                   |
| core_17 | AACTTCAGTGGCGGACTTGAAGAAGTCGTGCCTCGATGC                 |
| core_18 | GGTCAGCTTGCCGTAGCGCCGTCTCGTCTCAGCAATCTTTTACAAGGGAAT     |
| core_19 | ATGGTGGCTCCTGGACGTAGCCAACTTCACCGAGTTACGGTGAGTACCGGCGTC  |
| core_20 | TGCCGTCTGTGAGAATATGGCAAAAACGTTGGTCAAGGTCCTCATTTTATTAG   |
| core_21 | TCCTTGAATGTTGTAGTTGTACTGGGCGGAC                         |
| core_22 | CTCGGCGGATCTTGAAGTTCACGTGTTCTG                          |
| core_23 | GTTGTGGCGTCGATGCCCTTCAGTGCTTCAT                         |
| core_24 | CGTTCTTCAGGGTGTCCGCCCTCGTTCCGGGCA                       |
| core_25 | CTTGATGCTGTGACTATGATCCCTGTCAGCCAGCTCGA                  |
| core_26 | GGGCAGCATCACGAACTCCAGCAGGGCAACA                         |
| core_27 | CTTCTCGTTGGGGTCCCTTCCAGCTTCGGGGCGAAGC                   |



|          |                                                                    |
|----------|--------------------------------------------------------------------|
| core_28  | TGATCGCGTGGGTGCTCAGGTAGTGGTTGTCATATAGACTTACTGTCAGCTCCTT            |
| core_29  | TCGTCCATGCCGAGAGCACAGTCAATACGGGTTCCAGCAT                           |
| core_30  | AGGCTGATGTCCTGCCACCCACATTCCAAGGGCGATCCCCGAA                        |
| core_31  | ATGACACTACTCAGCGTAACCACTCTTCTAAAATAAA                              |
| core_32  | AGAATAGACTGGCAACTAGAAGGTGATCCCTGCTTTTC                             |
| core_33  | CACCCCCCACTGATCATAATACCATCGTGGCCATGTT                              |
| core_34  | CCCCTTGCTCAGCGAGCTCTAGCAGTACTT                                     |
| core_35  | GGGCGCTGATCAGGGTTATTCTATATTTTCGTAATTGTT                            |
| core_36  | CCACACCGCTTGACGGGGAAAGGGACTCCA                                     |
| core_37  | GCCTCAGATCGGAACCCTAAAGGTATCAGG                                     |
| core_38  | GAAAGGAAGGGAAGATTTGGAACGATAGGGTCTCCATA                             |
| core_39  | CACTATTAAGAAGCTCCGGCAATATTTAGATTTTCAACCGTCGTGCTGCAACT              |
| core_40  | AGGGCGAAAAACCGTCGAGCCCCCGCACATTCACGGAAA                            |
| core_41  | TGAGTGTCAAGAAGACTCAGCGATCCTTTGGAAGTCCCCTTGATTGGGCATA               |
| core_42  | TATAAATCTGACGCTGTTACCAAAAAACAACCCATTTGCGTCAAT                      |
| core_43  | AAATCCCTGTAATTGGTCGTTGGGCGGTCA                                     |
| core_44  | AATCGGCAACGTCAAGCTCCGCCCCCTGACGAGCATCATGACCCC                      |
| core_45  | TAACCAATAGGGATTTTAAAGTATGAGACTTTATATAGACCTCCACCGAGCTCGAAGGGCCG     |
| core_46  | TCATTTTAAATCAATGCATACGTCATTATTGTGCCAAG                             |
| core_47  | AAATCAGCGCGATGGCAAAAGCGCGTTGCTGGCGTTTAGTCAAT                       |
| core_48  | ATACATATTAGACCGAAAGAGTCCGACGCTCAAGTCAGAGGTGCAGACGCGGAA             |
| core_49  | TGTTGAGATGCAATTAAGGCACGGGGAGGGACCATGTAATTCTC                       |
| core_50  | AGTGCTCGTTTGGCGGCTCTGGCAGGGTGGTCGGGGTAGCGGCTGAAGC                  |
| core_51  | ACTTTAAACGATGTAAGAGTGGTCTAGATAACGCCTACCGACTCCCATTGACGTCA           |
| core_52  | AAGCGTTATGCCATATAGCAGAACAGATGG                                     |
| core_53  | AAGCTAGGGCCGCGAGGTCCGGTCAGGGTGGTCACGAGGGCATCTCGAGTTCCGCA           |
| core_54  | AACGTTGTAACAGCTCCCCTACTAGTGGATCCGTACACTACGATACAAACTTGCAAATAG       |
| core_55  | CTACAGGCGCGCCACCCGTAAGAGGCGGGCAGGGGCCGCTCGCCGATGGGG                |
| core_56  | CTCCATCCTTACCGCAAGCATTTGCAAGTG                                     |
| core_57  | AAACCAGCTGGCCCGCTCTGCTGGAAATCCCCGTGAGT                             |
| core_58  | CTTACCATCCAGCCGGGTACCAACCAGGATGGGCACCAC                            |
| core_59  | GTCTGACACAGTGAAGAAAGTCCGGCATATGATACACTTGATGTACAGTCAAT              |
| core_60  | AATCAATCTGGTCAATTGACTAATGGGCAGTTTACCCTAAATACTCC                    |
| core_61  | TCTTTTCGGCCATTTTATGGGCTATGAACTAACAAAAAT                            |
| core_62  | TACGGGTCAAAGAATTGAATGCGTGGCGATAGCGGTACGCTGCGACAATGCGATCCAGTT       |
| core_63  | TCACGTTAAGGCCGAGGGTTCCGGATTTAGACGCGCTTAATGTC                       |
| polyT_1  | CTCTTGCCCTCAACCAGTACAGCCTGGTAGTGGTCGGCGAGCTGCACGCTGTTTTT           |
| polyT_2  | TTTTTCCAGCAAAGGCCAGTGAGTGACGTTAAATATCTTACCTAGTTTTT                 |
| polyT_3  | TTTTTGGCGTTTCCCCTGGGACTATAATGCTACAGTGTCCAGAAGCGAA                  |
| polyT_4  | TTTTTTGGAAGTCCCTATTACCCATT                                         |
| polyT_5  | TTTTTCTCTCCTGTTCCGACCAAGCTCCCAGGATCTAGTTCCTGAAGTTTTTT              |
| polyT_6  | TTTTTCTGTCGGCTTTCTCTCAAGCAGCAGATTACGTTTTT                          |
| polyT_7  | TTTTTCAGTAAGCAGGCCATTGATGTTTTTTTTTTTACTGCCAAAGACGTCAATTTTT         |
| polyT_8  | TTTTTCGCTTTCTCATAGGCCCCACCGCTGGTAGCGGTTTTT                         |
| polyT_9  | TTTTTCACGCTGAACCTTTCGATAAGCTTTTT                                   |
| polyT_10 | TTTTTCAGTTCGGTGTAGAAAGAGTTGGTAGCTCTTTTTTT                          |
| polyT_11 | TTTTTCTTGAAGAAGCCCTCGCCGATTTTT                                     |
| polyT_12 | TTTTTGGGCTGTGTGCACGACCCAGGATGTACTGCACGCCGTAGTTCGCTCCAAGCTTTTT      |
| polyT_13 | TTTTTCCGTCCTCGATGTGAGAATTAGTTTTTT                                  |
| polyT_14 | TTTTTCGACCGCTGCGCCTTATCTTTGCTCACCAGCTTGCTCATGGT                    |
| polyT_15 | TTTTTAGAATAGGGCCCTCTATTTAGGTGACACTATTTTT                           |
| polyT_16 | TTTTTCGGTAAGACACGACTTGGGAGTGGCACGGTAACT                            |
| polyT_17 | AATCCTCGCGTTTCTCCGAGTTGGCTTCATTACGCTTTTTT                          |
| polyT_18 | TTTTTCTGCTATTGTCTTCCGCATCCCAGCATGCTTTTT                            |
| polyT_19 | TTTTTAGCACTGGTAACAGGAGCGGGCTAGAAAGGAC                              |
| polyT_20 | TTTTTTTTGGGGTCGAGGTCACCCTAATCAAGTTTTTTT                            |
| polyT_21 | TTTTTATGTAGGCGGAGATAACCATTTTT                                      |
| polyT_22 | TTTTTGGTGGCCTAACTAAGGATTAGCAGAGCGAGGTTTTT                          |
| polyT_23 | CGGGTCTCATGAGCGGGCACCTATTCTTTGAATGCCAGGCGGGCCCCGCTTACCGGATACTTTTT  |
| polyT_24 | TGTAAGCGCAAATGCCCGCAGACCCACTTTTT                                   |
| polyT_25 | TTTTTAAACAGGAAGGTTAATTTTTTTTTTTTTTTGTTAAAATTCCGGCAAAGGTTTTT        |
| polyT_26 | TTTTTAGTATTTGGTATCAGTATCGCCACTGGCAGCTTTTTT                         |
| polyT_27 | TGCAACTCTCAAGGATCAGTCTATTTTCATCCAGTTGTTACGACATCTTCGGGAAGCGTGGTTTTT |
| polyT_28 | TTTTTGTATGCGGCGAGGGTGTAGCAATTTTT                                   |
| polyT_29 | TTTTTGTTACCTTCGAAATCGTCTTGAGTCCAACCTTTTT                           |
| polyT_30 | TGTTATCATGCACCCCCGTTTACGCTTTTTT                                    |
| polyT_31 | AGTCATTTCTGTGGCGGGTCTTTGTAGTTGCCGCTGTTTTT                          |
| polyT_32 | GTAAGTTAGTAAGTAGCGGCCAGTACGCTGTAGGTATCTTTTTT                       |
| polyT_33 | TTTTTCCGGTCCCAACGCGCCCTCG                                          |

|          |                                           |
|----------|-------------------------------------------|
| polyT_34 | TTTTTGATCCGGCAAACAAAGGGTCTGCTGAAGCCATTTTT |
| polyT_35 | TTTTTGCTCACCGGCTCCGTATTAA                 |
| polyT_36 | TTTTTTGGTTTTTTTTGTTTGGTCCACTAGAAGAACTTTTT |
| polyT_37 | TTTTTATCCTTTTAAATTCTATCCAC                |
| polyT_38 | TTTTTCGCAGAAAAAATCGTGCGTTTTT              |

### 2.2.1.4 sc\_EGFP1 12HB

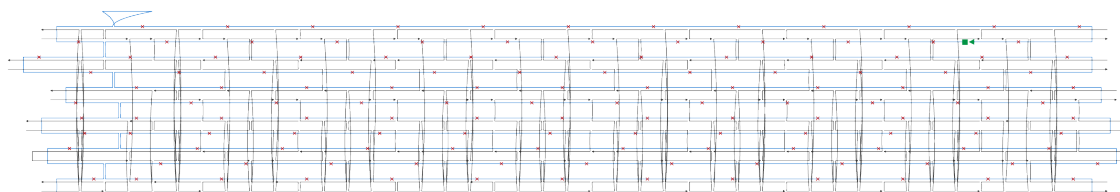

**Fig. S23 | Scaffold routing and staple design for sc\_EGFP1 12HB.** Scaffold routing is shown in blue, staples are given in black, breakpoint for addition of sequence is marked by a green square (5') and arrow (3'). Design was prepared using caDNAo v0.1.

**Table S10 | Individual staple sequences for sc\_EGFP1 12HB.**

| Name    | Sequence 5' - 3'                                                |
|---------|-----------------------------------------------------------------|
| core_1  | TGCACGAAGTCCTCCGATCGTTGTTAAAATTC                                |
| core_2  | CGTTCGCTCCAAGCTGGGCTGTGGTACTGCC                                 |
| core_3  | GTGTAGGTGCGAGTGTTATCACTCGCCACCTA                                |
| core_4  | CACGCTGTAGGTATCTCAGTTCGCTCCACCC                                 |
| core_5  | TCATAGCTCTGCATAATTCTCTTTAGGGGTT                                 |
| core_6  | CCTTCGGGAAGCGTGGCGCTTTCATTGGCGT                                 |
| core_7  | CTTTCTCTAAGATGCTTTTCTGATATTTGA                                  |
| core_8  | GCCGCTTACCGGATACCTGTCCGCTTGACGT                                 |
| core_9  | CGACCCTAACCAAGTCATTCTGTTATCAGG                                  |
| core_10 | CTCCCTCGTGCCTCTCCTGTTCTCAGCCA                                   |
| core_11 | CCTGGAAGCGACCGAGTTGCTCTACTCTTC                                  |
| core_12 | TATAAAGATACCAGGCGTTTCCCTGTAACGC                                 |
| core_13 | GACAGGACCGGGATAATACCGCGCTAAGGGC                                 |
| core_14 | TCAAGTCAGAGGTGGCGAAACCCACTAATGA                                 |
| core_15 | ATCGACGCTAAAAGTGCTCATCATAAGGAAG                                 |
| core_16 | CCCCCTGACGAGCATCACAAAAACTAGTC                                   |
| core_17 | AGGCTCCGGGGGCGAAAACCTCTCA                                       |
| core_18 | CCGCGTTGCTGGCGTTTTTCCATTCAATGAG                                 |
| core_19 | TCATTGACGTCAATAGTAGGTGCAGATGAACTTCAGGGTCAGCTTGGGCGGGCCCCGCGCAGA |
| core_20 | CCGTAGGTACGAGGGTGGGCCAGGCATTTA                                  |
| core_21 | GGCATTGCGCCCTCGCCCTCGCCGGCCATAAGTTTGATCTATGGCTTC                |
| core_22 | ACACGCTGGAAGCACTGCACGCCCTAGATT                                  |
| core_23 | AACTTGTGGCCGTTTACGTGCGCATACGTA                                  |
| core_24 | GTCCAGCTCGTGCTGCTTCATGTAGAGTGAT                                 |
| core_25 | CGACCAGGATGGGCACCACCCGAACCGCATCATGAGATAGTTTG                    |
| core_26 | GTGAACAGTAGCCTTCGGGCATGGCAGGACC                                 |
| core_27 | CTCCTCGCCCTTGCTCACCATCTCCGCTATCGATCCTTT                         |
| core_28 | CGAGCGGGTCCTTGAAGAAGATGGTCTTTGC                                 |
| core_29 | CCGCCAGTGTGATGGATATCTGCAGGTGGAGATCAATCT                         |
| core_30 | GAATTCCTCACCTCGGCGCGGGTTAGTGGTT                                 |
| core_31 | AGCACACTGGCGGCCGTTACTAGTGCCAAAACCTGACAG                         |
| core_32 | TGGATCCGATGCGGTTACCAGGGCGCCGATG                                 |
| core_33 | AGCTCGGTACCAAGCTTGGGTCTACGACATTCACCTATC                         |
| core_34 | CCCTATAGTCTCCTTGAAGTCGGGCGAGC                                   |
| core_35 | TGAGTCGTATTAATTTGATAAGCGCCATTATCCATAG                           |
| core_36 | CCAGTAAGGTACTCCAGCTTGTGTGGCGGA                                  |
| core_37 | GTAGGTCAAAGATCCGTCATGTAAGTTTACCCTAAATA                          |
| core_38 | GGTGGGGACGCTCAGGATGTACTTCAATGGAAAGTCCCT                         |
| core_39 | GCGGACTTGATTTTTGGTACCATGGGAACATACGTCATTA                        |
| core_40 | GTGCGTTTTACCTACACGCCCGGGGGTTCGTTGGGCGG                          |
| core_41 | CTTGTAGGTTTTAACTTGGAAATTTACCCTAAGTTA                            |
| core_42 | TGTCGCCAACTTGGTCAAACCTCCATATATGGGCTATGA                         |
| core_43 | ATGCCCTTAGTGAGGTTGGAAAGTTGATTACTATTAAT                          |

|          |                                                                |
|----------|----------------------------------------------------------------|
| core_44  | CCCCAGGATTTCGTTCTGCGTCAAATGTCAACGCGTATA                        |
| core_45  | GGCTGGCAACTAGAAAGCAATAGGCGTTACATG                              |
| core_46  | GGAAAGGCACGGGGGAGAATCAAAAATTCAGCTAAGTTGGC                      |
| core_47  | GACAGTGGGAGTGGCTGTTGTTCTGGTGTATGGCAGCA                         |
| core_48  | GCGATTGCAATTTCCCTTTAAAGACGCAACGTGCCATCCG                       |
| core_49  | CCCAGAAATAGAATGAGAAAAACAGAGTAAGAGTACTC                         |
| core_50  | CTCCCCCTTGCTGTCTACGTGAACATCCAGGTATGCGG                         |
| core_51  | CCCCAGCATGCCTGCTGGGGTCGAGCAGAAAGTCAATA                         |
| core_52  | TCCGCCTCAGAAGCCAAACCCTAAGCAATAAAGAAGCTT                        |
| core_53  | ACCACCACACCCGCCGGACGGGAAGACCCACCGTTCTTC                        |
| core_54  | CTGGCAAGTGTAGCGGGAAGGGACATCTGGCTACCGCTG                        |
| core_55  | GCAAAATCCCTTATAGGGCAAACATCTCAAGGGGTGGTC                        |
| core_56  | GAATAGAAATTGTAAGCGTTAATATTTTGTGCAAGT                           |
| core_57  | CCGAGATAGGGTTGAGACCTTCCAGGGTCTGTAGCGGCT                        |
| core_58  | GAACAAGAGTCCACTACATTTTTATGTTAAGGGAAGAAGT                       |
| core_59  | ACGTGGACATGATTTAGAAAAATAAACAAA                                 |
| core_60  | TCCAACGTCAAAGGGCCACCTACTAAAGGATCCCTGGACG                       |
| core_61  | AGGGCGATGGCCACCTGCCCAAAAATGAATTGCCGTC                          |
| core_62  | CTAATCAAGTTTTTATTGTCTTATGAGTATCGAACT                           |
| core_63  | AAAGCACTAAATCGGTAGAGCCGCTTAATCCAGCTCG                          |
| core_64  | CCCGATTTAGAGCTTCGCTTAATCTGTCTATTGTTGCCG                        |
| core_65  | TACTTTCACGAACGTGGCGAGAAAGTCACGCT                               |
| core_66  | TCCTTCGCCCCCGTTTCAGCCCGACCGACTGGGGCGT                          |
| core_67  | ATGGTTACGCTCGTCATTGACCGCCAAGTAGGAAAGT                          |
| core_68  | ACTGTCATTGTTGCCATACTATGGTAATAGCGATGACTA                        |
| core_69  | TGACTGGTGTAGTTGCAATGGGCATTGATGTACTGCCAA                        |
| core_70  | AGAATAGTTCTATTAAGGCGGGCCATCCCCGTGAGTCAAA                       |
| core_71  | TGCCCGGCGGTCTCGGGAACCTCCATTGACGTCAATGG                         |
| core_72  | CACATAGCCCAGCCACCCCGTAATCCCGTTGATTTTGG                         |
| core_73  | TGGAAAAGCTCACCGAATAATCATGGGGCGGAGTTGTT                         |
| core_74  | CAAACAACGCTCTGCTGAAATTTTTTAACGCACAGT                           |
| core_75  | CAAGGCGACGAAATCGGCGTTAAATTTTTGTTAAATCAGCGTTAGCATCCCCCACTTGGCA  |
| core_76  | CAACGATAAAAAAGGAACAGATGGTGACACTATAGAATAGGGCCCT                 |
| core_77  | CCGGTCCAAGTGGGCTGGGCATAATGCCA                                  |
| core_78  | GTTTGGTTTTCTACGGGGTCAAACCTTGACAGCTCGTCCATGCCG                  |
| core_79  | TTGCTACAAAACCTCACTAGGAAAGCCCGCGGCGTACGAACTCCA                  |
| core_80  | CCAGTTAATTATCAACAGACAATATGTGATCGCGCTTCTCGTTGGG                 |
| core_81  | GGGAAGCTCGTCTATCGTTATTGTCTCATGAGCGGATAC                        |
| core_82  | TTGTTGCCTAAATTACCCACCCCTCAGGGCGGACTGGGTGCTCAGG                 |
| core_83  | TCCGCCTCCCATCACCTTTTTCAATATTATTGAAGCAT                         |
| core_84  | CAACTTTAAAAGTATATCCCAATCGTCGGGCAGCAGCAGGGGCCGT                 |
| core_85  | GGCCGAGCGGTGCCGTGACACGGAAATGTTGAATACTCAT                       |
| core_86  | GCCGGAAGTTACCAATCACCGCATGGGGTGTCTGCTGGTAGTGGTC                 |
| core_87  | ATTTATCAAGGGAGCCGCAAAATGCCGCAAAAAAGGGAA                        |
| core_88  | GCTCCAGTCAGCGATGTCACATTGCACGCTGCCGTCCTCGATGTTG                 |
| core_89  | ATACCGCGAAGCCGCGCAGCGTTTTCTGGGTGAGCAAAA                        |
| core_90  | TGCAATGTTGCCTGAGCGCGTATCTTGAAGTTCACCTTGATGCCGTGTGGCTG          |
| core_91  | CCCAGTGTGAGCAAACCGTACACGCCTAC                                  |
| core_92  | CAGATTAATTTACCGTATGATACACTTGAT                                 |
| core_93  | TGGAACGAGGCATCGCAGTTTGCCGCGCACATTTCCCCGAAAAGT                  |
| polyT_1  | TTTTTACCGTAAAAGGTTGAGATCCAGTTTCGATGTATTTTT                     |
| polyT_2  | TTTTTCCCGGTAAGACACGAATCGTCTTTGATCCGGCAAAAAAG                   |
| polyT_3  | TTTTTCTGCTTATATAATAACTACGATACTTTTT                             |
| polyT_4  | TTTTTGTAACAGGATTAGCAGAGCGAGGTATCTTATCGCGTGGTTT                 |
| polyT_5  | TTTTTCCATGATATAGACGTTTCTTCTG                                   |
| polyT_6  | TTTTTCTTGAAGTGGTGGCCTGGCTGATCAGCGAGCTCTAGGCACGGG               |
| polyT_7  | TTTTTATTTGGTATCTGACCACCGCTTTTT                                 |
| polyT_8  | CTCGCCAGTTACCTTCGGAAAAAGAGTTTTTTTTTTTTGGTAGCTCTGAGTCCAATTTTT   |
| polyT_9  | TTTTTACCCACTCGTGCAGAAAGGAGCGTTTTTTTTTTTGGCTAGGGCGCTTGTCCGTTTTT |
| polyT_10 | ATGTTGTGTTTTGTTTCGAAACTACGGCTACACTAGAAGAAGTTTTT                |
| polyT_11 | TTTTTGGGAGGCTTACAGAAAGCCCAACTGATCTTTCAGCATCTTTAGGATCT          |
| polyT_12 | TTTTTTGGTAGCGCACTGGCAGCAGCCACTGTTTTT                           |
| polyT_13 | GCAAGCAGCAGCTTGCCGGTGGCGGTGCTACAGAGTTTTTT                      |
| polyT_14 | CTCCCGTTGTAGTTCAAGTGGGTTCTCTAGTTAGCCAGAGAGCTTTTT               |
| polyT_15 | TCGTGTAGGACCTCCAAGGCCAGCAAAAGGCCAGGATTTTT                      |

### 2.2.1.5 sc\_EGFP1 20HB-LS

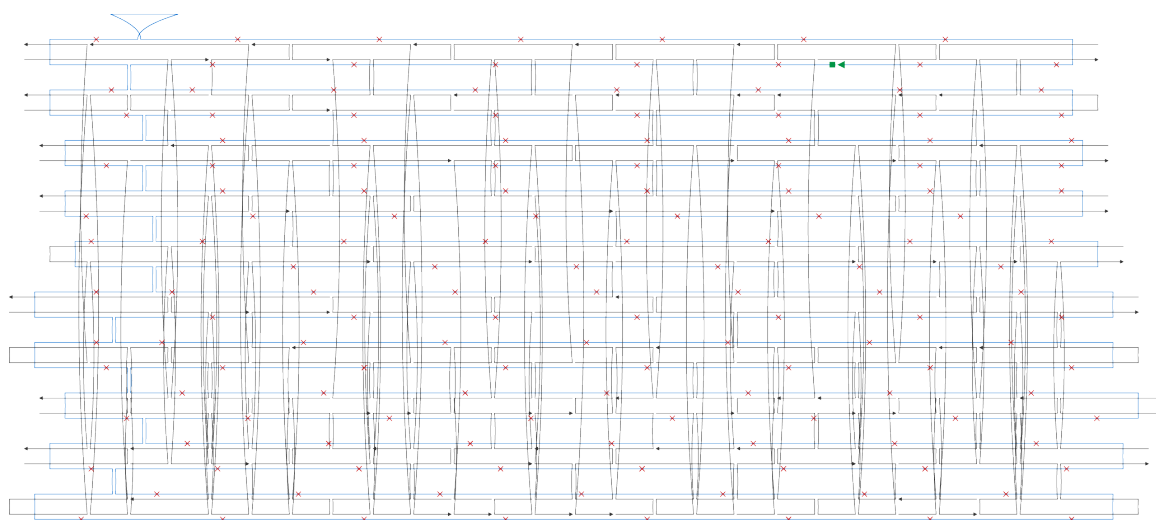

**Fig. S24 | Scaffold routing and staple design for sc\_EGFP1 20HB-LS.** Scaffold routing is shown in blue, staples are given in black, breakpoint for addition of sequence is marked by a green square (5') and arrow (3'). Design was prepared using caDNAo v0.1.

**Table S11 | Individual staple sequences for sc\_EGFP1 20HB-LS.**

| Name    | Sequence 5' - 3'                                                                  |
|---------|-----------------------------------------------------------------------------------|
| core_1  | CGCGTATATCAATGAGTGAGCAACCATAGGCTTAAATTTTTGTTAACAAAAGAA                            |
| core_2  | CGTAAATAACTAATGACCCCGTAAACCCGACA                                                  |
| core_3  | CAAAACAAACTCCCATTGACGTGGAACATAAACCCGGTTGAATACATGCCATTCACCCTAGGGAGC<br>CCCGATTTA   |
| core_4  | TCAAACCGCGCCTACCGCCATTTGCGTCAATTTTTGTTAAGTCCCTGTAACGCGGAACCTCTCCCC<br>TG          |
| core_5  | GCCAAAAGCTCTGCTTATATAGTCCTCGCCGGCACCTCAGAAGTGTGTGCAAAAAGCGG                       |
| core_6  | GACTAATGTAAGCAGTGGGTTCCAGTGTGGTCTGACATCCAGTCCGATCAA                               |
| core_7  | AAAGTCCCTATAGTGAGTCGTATCACACTGAAATCAAT                                            |
| core_8  | AGTTGTTACGACATTTACTTGTGGTAGATAACGACCACGAGTGTATGGCTGGCAACTAGAAGGCACAG<br>T         |
| core_9  | TCTAGTTATTTTCTACCACTTGATAACTAGTCAATAATCAAAAATCG                                   |
| core_10 | TAATTTGAAAACCTCACGTCAATAGGGGGCGTACTTGGCA                                          |
| core_11 | CCCGCCCTCGCCGGACACGCTGATGGAAAGGCAACACGTCATTATCAGCCAGGCGGGCCGTTCCGAC               |
| core_12 | GGCCAGGACCCCGGTGAACAGCACCTCCAAAAAAG                                               |
| core_13 | TCATGTGGTCGGGGTAGCGGCTGAAGCACTGCACCCGATACCATCTCGAGCGCC                            |
| core_14 | TTGAAGTTCACCTTGTGTACTCCAGCTTGTGCCCCAGGGTGGTGTCTTATCAGTAGTTGCCTGTGACT              |
| core_15 | CACGCTGCCGTCCTCGATGTTGTGGCGGATCCGAGGCTGGTTGTCAG                                   |
| core_16 | AGTGGTCGGCGAGCTGTGACACTATAGAATACCTACTCAGACAATGCGATGCAAGAGAAAGTTAGCTCC<br>AGTCATT  |
| core_17 | GGCCGTCGCCGATGGGGTGTCTGCTGGTATGCGGTTACCAGGGTGTGCCCTCGAACT                         |
| core_18 | TCGGGCAGCAGCACGGTCACCTCGGCGGGTCTTGTAGGTGCTGCTGGAAGCTACTAAAGTCGCCAC<br>AT          |
| core_19 | GGGCCCTCTAGATTACTTGTACAGGCGAGTTACATGATC                                           |
| core_20 | GCTCGTCCGCCCCACCCACCCCCAGAATAGGGCGCTAGGGCGCTGAAGAGTCCACTATTA                      |
| core_21 | AGTGGCACCTTCCAGGGTCAAGGAAGGCACAATCGGAAGTTATGGCAGCAACA                             |
| core_22 | TTGTCTTCCCAATCCTCCCCCTTGTGTCTATGCCGAGAGTGATCC                                     |
| core_23 | ACGGGAAAGCCGGCGAACGTGGCTTTCCTCATTTTATTAGGAAAGGACAGTGGGGAGCTTGAAGTAAG<br>TTGCTTTTC |
| core_24 | GAAGGGAAGAAAGCGAAAGGAGCGAATGACA                                                   |
| core_25 | ATCAAGTTTTTTGGGGGCATTTATCTTCTTTTGGGCGG                                            |
| core_26 | TACAGAGTTATTGAATCGAGGTGCTCTGCATAATTCTCGGGAGGGCTTACCAT                             |
| core_27 | ATTGTCTCATGAGCGGATACATAGGGCGACATAAGTTAATTGGCGTTACTATGAATGGGGT                     |
| core_28 | TATTTAGAAAAATAAAAAACCGTCTCAACCATTCGGTCCAGCCAGCCGGAAGG                             |
| core_29 | CGCACATTTCCCGAAAGAAGTCCGGCGACCCCCCATGTGTCTGCAACTTTATCCGCCTCCAGTTACC<br>TCTTGCCC   |
| core_30 | AAAGTGCTTTTACCCTATTAATGTAAGTCCCAAGTGGG                                            |
| core_31 | TGTAAGCGTTAATATTGTTCCAGTACGGGAGTTCCTCAATATTAATTGTTGCCG                            |

|          |                                                                                 |
|----------|---------------------------------------------------------------------------------|
| core_32  | ATCAGCTCCTGTTGAGCAAAGGGCGGGCCATTTACCG                                           |
| core_33  | CGGAAATCTGGTAGCCGTCGTGCCGTTTACCTTCAGGGTCAGCTTGTTGTAGT                           |
| core_34  | GGGAATAATTTGAATGGAAGCTCCCTCGTGCCTCTCCTATTTACCG                                  |
| core_35  | GCAAAAAGGTGAGTATATCAGGGCGATGGCCCACTACGTGAACCA                                   |
| core_36  | CAAAAACAGGGTCCGGGACTATAAAGATACCAGCGTTATATATGGAAATGCCGCAGATTA                    |
| core_37  | GGGTGAGAGTGTATGGGACTCCAACGTCAAAGGGCGAACAAATAGGGAAGGCAGCTATGACTCCACCC<br>ATTGACG |
| core_38  | TCTTTTACACCTAAATACGCTCAAGTCAGAGGTGGCGAATTGATTAGCGTTTCT                          |
| core_39  | CCCACTCAATTCGCGTCCGCCCCCTGACGAGCATCACATGTCAAACTGATC                             |
| core_40  | CCGTAAGATGGCCGCCTCACGGGTCAGAAGATGAAGTCGCCGTCAGCTCGACCAGGA                       |
| core_41  | GAGTTGCAATGCTTACTTTGATCGCCAGAGACCGCATCACCATGGTAATAGCGATTATGATA                  |
| core_42  | TTTAAATCGTCGTTTAGTTCGCACTGGGTGCTCAGGTAGTGGTTGCGGGCGGTCACGA                      |
| core_43  | GAGTAAGTGGTATGGCTTATTTCGTAACCACACACCCGCCGCGCCTGCTAACTCCAGCAGGACCA               |
| core_44  | TACGATACTTACTGTCTCATACTCAGGGTTCTGCCGCTTACCGGATACCTCTTCGGGAA                     |
| core_45  | TGACTCCCGGTGGTTGGGGCGGGGAGACTTGGAAATCCCGTGAGTCAATGGATGCAAGCA                    |
| core_46  | TCATCCACAATAAACCTCCGATCATCAGCGAGCTCTAGCATTTAGG                                  |
| core_47  | TATTTGTTGGGCACCGCACGGGACGTTGCCATGTTGCCGTCTCTTGAAGTCGATGCCCTTCAGCT<br>CG         |
| core_48  | GATCTGTCCGCGCAGCCGTACACTATCCACGCCATTGATGTAICTAGTTTACGATCTCAA                    |
| core_49  | ATATATGAGTGGAAAGATAAGCCAACGTAGATGTACTGCCAAGTAGGTCATTGA                          |
| core_50  | GAAGATCATCAGTGACTTGCTCAGGTCAGGGTGGTACAGAGGGTGCCGAGCGATCTCAGCCTGAGAA<br>T        |
| core_51  | GGGGTCTGTTTACGAGGCGTCAATTTGGAACGCAAGTGTAGCGGTACGCTGCGCAGCTCCGTAATAC<br>CG       |
| core_52  | ACGCTCAGTAAACTTGATGGATATCTGCAGAATTCCAG                                          |
| core_53  | CGTTAAGCGATGTAAAGCAGAACTAGACCGAGATAGGGTTGAGTGTGTTTGAAGTGCACCC                   |
| polyT_1  | TTTTTAAAAAGGCCGCGTTTGTGGCGTTTTTAAAGCCAGATCCAGTTGGATTTTG                         |
| polyT_2  | TTTTTCTTCTCATAGCTCACGGGGTTCGTTTCAATAGGTAGCTCTTGATCCGTCCTGTTG                    |
| polyT_3  | TTGACGTCAATGGGCTTCGGTGCATTTTGTCCAAGCTGGGCTGTTTTT                                |
| polyT_4  | TTTTTGTTCGGTGTAGGTCGGCTGTAGAAAGAGTTTTTCTTGAAGTGGTTTTTT                          |
| polyT_5  | ATAAGGTCACTGACTGGGTTTTTTTTTTCATAATGCCACAGGAACCGTTTTTT                           |
| polyT_6  | TTTTTGTACCAAGCTTGATTATCAAAAAGGATCTTTTTTTTTTTTACCTTAGATCCCAACGTTGTTGCTTTTT       |
| polyT_7  | TTTTTGTGCACGAACCTGTCTGCTGAAGCCAGTTTTTTTTTTTACCTTCGGAAGTATCTCATTTTTT             |
| polyT_8  | TTTTTACGTAGCCTTCGAGTTTTCGTTTTTAAATCATTGGAACCTACCG                               |
| polyT_9  | TTTTTTGCGCCTTATCCGGTAAGATATAGACGTTGTGGCTGCCGTAGGACCGCGA                         |
| polyT_10 | ATGCCGTTCTTCTGCTTGTGCGGCGCAATGATTGGCATCGCCCTCCGTTTACGCCCCACCGCTTTTTT            |
| polyT_11 | CAGGGCGGCAGTTAATGGCATGGCTACTAGTGGATCCGAGCTCGTTTTT                               |
| polyT_12 | TTTTTGTGGGGTCTTTGCTTGTGATCGATCGTGGACATTCGAAATCCCTTATAAAT                        |
| polyT_13 | TTTTTCATAGAGCCACCGCATCCCAGCATTTAATGTCTGTACGCGTGTCTATAAAAATGTCATGAG<br>GGTCTCCC  |
| polyT_14 | TTTTTCACTGGTAACAGGATTGTAAGCACTAGGGGACTTATCGCCACTGGCAGCAGCTTTTTT                 |
| polyT_15 | ATTTTTTAACCAATAGGCTTTTTTTTTTTCGAAATCGGCACCTCAGAAGCTTTTTT                        |
| polyT_16 | TTTTTGAAAACCTCTCAAGGATAACGTTCTTCGGGGCTTTTTT                                     |
| polyT_17 | TTTTTGGCCCTAACTACGGCCAGCAGAGCGAGGTATTTTTTTTTTGTAGGCGGTGCGCGTGGCGTTTTT           |
| polyT_18 | TTTTTCATTGCTACAGGCCGCTTCTTTTTT                                                  |
| polyT_19 | TTTTTTGGTATCTGCGCGCCCTAGAAGACCCGGTAAGACACGGAGGGGCAAACAACAGATCACTCATGC<br>CCTAAA |
| polyT_20 | CCAGTGCTCATCTATCGTCTTGGTCTTTTTTTTTTCAAACAGTATTTTTTT                             |
| polyT_21 | GAAGTTTTGCGGCCGTGGACTTGAAGAAGTCTTCCGTCGTCTTGAAGAAGATGGTGCCTCCTGGTT<br>TTT       |

### 2.2.1.6 sc\_EGFP1 20HB-LP

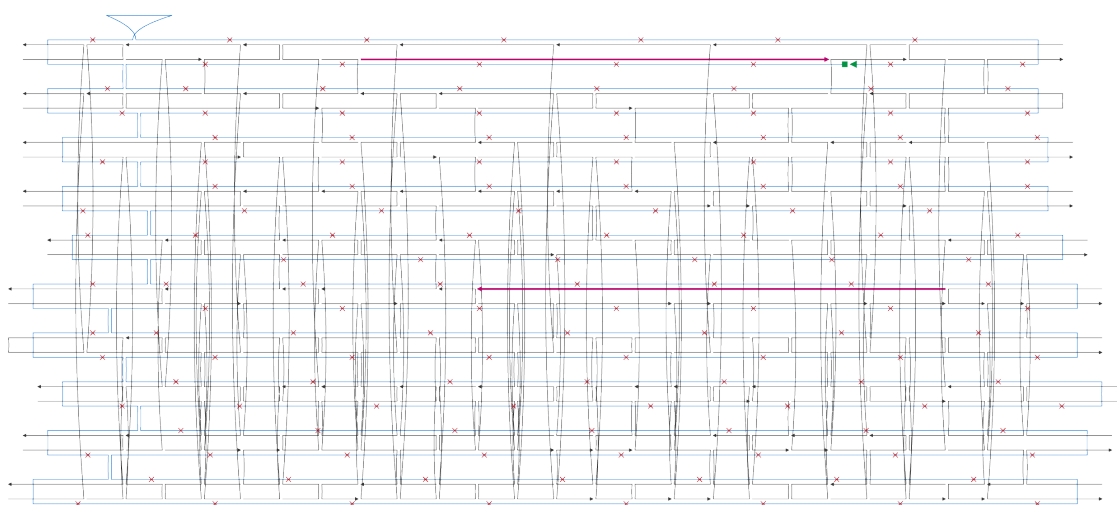

**Fig. S25 | Scaffold routing and staple design for sc\_EGFP1 20HB-LP.** Scaffold routing is shown in blue, staples are given in black, breakpoint for addition of sequence is marked by a green square (5') and arrow (3'). Long 93-mer 'primer' sequences at the 5' promoter and 3' polyA regions flanking the EGFP gene are given in pink. Design was prepared using caDNAo v0.1.

**Table S12 | Individual staple sequences for sc\_EGFP1 20HB-LP.**

| Name    | Sequence 5' - 3'                                              |
|---------|---------------------------------------------------------------|
| core_1  | GCGTTTTTAATTCGCGTTAAATTTTATAAATAGCAGAA                        |
| core_2  | CAATGGGCTCTTCCCTTAAAGAGTTGGGAGGGCACTCGCCCTCGCCCTCGCCGGA       |
| core_3  | ATTTACCAAGTCCCTATTGGCGTTGACGTC                                |
| core_4  | AAGGCCAGTAATGCCAGGCGGGCCCAAGTAGGGGTCTCCC                      |
| core_5  | CGTCATTATTGACGTGTATTGATTTTGGTGCCAAAACAACTCCCATTACTATG         |
| core_6  | ATATGATACACTTGATGTACTGCGATGTAC                                |
| core_7  | CGTCAATAGGGGGCGTATAGCGAATAAGCCAGTAAGCA                        |
| core_8  | CCCGTGAGACCGTACACGCCTACCTCCAGTC                               |
| core_9  | TCAAACCGCTATCCACGCCATTCAAGTGGGAAAAAAG                         |
| core_10 | CGACATTTTGATCCGGAACATATTGGGCGGTGAGCCAGCTCTCCT                 |
| core_11 | TGGGGCGGAGTTGTTACACGCTGACCGTCGTGTACCGCGA                      |
| core_12 | GCGTCAAATGGGGTGGAGACTTGAAATCCATTGACGTTTTTTGTTAAAATGCC         |
| core_13 | GCCAGAGAGCTCTGCTGAACAGCATCAGTGGCCGAGCG                        |
| core_14 | TCTAGTTATGCCAAAACCGCATCACCATGGTAACCTGGCTTTTCTACAAGTATTCTTGCCC |
| core_15 | TATAGTGAATCCAGAAGTTTTTGAAGCTTCGTCGTT                          |
| core_16 | CCGTTTACGTCGCCGGCCATTTCCGGTGGTTTCAATGGA                       |
| core_17 | TGGGCACCACCCGGTTATATAGACGCGCAGCAGTTTACCCTAAATACTCCACC         |
| core_18 | CCTTGCTCACCATCTCGTGGGTTCTTTGATC                               |
| core_19 | GAGCGGCCGTAACCTTCCGCCTCCGTTCCCA                               |
| core_20 | AGCGGCTGAACCTTTATGGTCTGACGAGTTGCCTTCAGCA                      |
| core_21 | GTGCTGCTTGATGGATATCTGCAGAGTCGTAT                              |
| core_22 | TGTGGCTTACCTTGATGCCGTTGGGGCAAAGTGTATAATCGGA                   |
| core_23 | GTTGTAGTTGTAAGTCCAGCTTGTAGCTTGCCGCTCCAGATTCATCCA              |
| core_24 | GCCCCAGGCCGCTCCTCGATGTTGTGGCACAGTCTCCGATCAGAGCTTG             |
| core_25 | ATGTTGCCGCTCCTCCTTGAAGTCGGTGGTCACCGGAAGG                      |
| core_26 | GATGCCCTCTGCTGGTAGTGGTGCATTTAGG                               |
| core_27 | GGGTGTTTCAGCTCGATGCCGTTCCACCAGG                               |
| core_28 | CAGCACGGGGCCGCTAGATTAACGATCAAGGGCGCTA                         |
| core_29 | TCGGGCAGCTCGAACTTACCTCGGCGCGGGAAGAAGTCTGTTGCCGAAATCAA         |
| core_30 | ACTGGGTGCTCAGGTAGTGATCTGGTATGACGCTGCG                         |
| core_31 | GGCTGGCAACTAGAAGGCGGATCTCACGGGTGGTG                           |
| core_32 | GATCAGCGAGCTCTAGGCGAGCTGCAGCCAGCGAGGGT                        |
| core_33 | CTTGACAGCTCGTCCATGCCGAGAGTGGTTGCTATTAAT                       |
| core_34 | CCGGCGCGGTACGAACTCCAGTCTTTGCT                                 |
| core_35 | AAGCACTACACTCATGGTTACTA                                       |
| core_36 | CCGATTTGTTGTCAGCCGTAAGATAGTTGCCCTGGTAG                        |
| core_37 | AACGTGAAAAAGCGGCTCAACCATCTCAGCGCAGATTACCTCCC                  |

|          |                                                                                                   |
|----------|---------------------------------------------------------------------------------------------------|
| core_38  | TCACCTAATCAAGTTTTATTGAACTCATACGGGGGTCG                                                            |
| core_39  | CTATCAGGGCGATGGCATGAGCGGGGAATAA                                                                   |
| core_40  | TTTGGAAACAAGAGTCTTCCCGATCTTTTAC                                                                   |
| core_41  | TGTTCCAGGGGCGCTGGCAAGTGTAGCGGTGCTTCATT                                                            |
| core_42  | TAGACCGAGATAGGGGTTAATATACCCACTCGTGACCCC                                                           |
| core_43  | AATCGGCAAAATCCCTTTGTTAATCTTACCG                                                                   |
| core_44  | TCAGGGTTATTGTCTCCACTACCATGCCATAAGTAAGGACCCACGCTTGAAGT                                             |
| core_45  | TTTGAATGTATTTAGAAGGGCGAAGGTGAGTATTAGCTCCAATAAACCACGCTG                                            |
| core_46  | GGGTTCCGCGCACATCACTATTAAGTGTATGACATGATCCAGAAGT                                                    |
| core_47  | AAAGTGCCAAAATCGACGCTCAAGTCAGAGGTGGCGAA                                                            |
| core_48  | ACCTAAATTGTAAGCTTGAGTGTGGCGTCACAGCTCCGATCCAGT                                                     |
| core_49  | GGAAGGCTGCAAGCAGATCTGTGACCAGGAGGGCCAGGGCACGGGC                                                    |
| core_50  | GCGTTTCTGAGAATAAGAACGGAAGGGAAGAAAGCGAAAGGAGC                                                      |
| core_51  | TTTACCAGATCTCAAATGCTTATCCTCGCCACGCCGTAGGTCAG                                                      |
| core_52  | TGCTTTTGCAAAAAGATACATATCCCCCTGGAAGCTCCCTCGTGCGGGCGGGCCGGGGCGAC                                    |
| core_53  | CTGTGACTAAACCGTACGGGGAAAGCCGGCGCGATGCA                                                            |
| core_54  | ATACGGGATCTAAAGTGACGCTCATAATTTCTGTGACTAATACGTAGATGTACTGCATTTACC                                   |
| core_55  | TAATACCGCGATGTATTTGTTAACCATAGGCTCCGCCCCCTGACGAGCATCAC                                             |
| core_56  | TTGGCCGCCAACAGATGAGTGGCACCTTCCAGGGTCAAG                                                           |
| core_57  | TTGTGCAACGAGAAAAGTGGACTCCAACGTCAAAAATAACAAAAACA                                                   |
| core_58  | CCCCATGTGACACTATAGAATAGGGCCCTCGCCGATGGGGTCCCTGCAAGCACTG                                           |
| core_59  | GGCGAGTTCGGCGACCAGTTACCAGAAGATC                                                                   |
| core_60  | CATCGTGGCTTTAAAAATTTAAAGATTITG                                                                    |
| core_61  | TAGATAACTAATTCTGTTGAATAGCATTTAGTTCGACCCCTGCCGCTTACCCCT                                            |
| core_62  | TATTTCTGTTTATCAGCTTCCGGTCCGAGGCTATTTCTCATTTTTATTAGGAAAGG                                          |
| core_63  | AGGCACCTAAGTCATTTGGGTGAGACAAATAGACCCGACAGGACTATAAAGATACCAGGCGTT                                   |
| core_64  | TTAAAAATGCACACTGGGCATGGCGGACTTGTCTTGTAG                                                           |
| core_65  | GGCAAACAACGGAAATCTTACTGTGTGAACCAACCTAAAGGGAGCCACAGTGG                                             |
| core_66  | AACCACCGTACTCCACTTGTGGCAGATGAACTTCAGGG                                                            |
| core_67  | GGGGTCTATATGAGCCAGTGTGATGTGGTGGTGGTGTGTCGCC                                                       |
| core_68  | GTGGAACGGTCAATTGACGCGTATATCAATGA                                                                  |
| core_69  | AAAACCTCATCCAGTTCGCCACATCAAAAAGAACGTAACCACCACACC                                                  |
| polyT_1  | TTTTTGAACCGTAAAAAGGCCGCGTTGCTGGTGAGCAACTGTTGAGACGTTAAG                                            |
| polyT_2  | TTTTTGCCTGGCGCTTCTCATTCTCCCGCGGTGTTTCAATATTTTGGG                                                  |
| polyT_3  | TTTTTGTATCTCAGTTCCGGTTAGCTCA                                                                      |
| polyT_4  | CAAGCTTGAAAGTCCCATAAGGTCATTTTTTTTTTGTACTGGGCACAAAAGGCCATTTTT                                      |
| polyT_5  | TTTTTTCGAGCTCGGTACGTCATGAGATTATCAAAATTTTT                                                         |
| polyT_6  | TTTTTTTTTTGGGCTGTGTGCTTATCTGCGCTCTGCTGATTTTT                                                      |
| polyT_7  | TTTTTGCTCCTGGACGTCAGTTAATCTAGATCC                                                                 |
| polyT_8  | TTTTTTTTTTGACCGCTGCGCCTTATCGGCCATGATATAGACGTTTACGCTTGCAATGA                                       |
| polyT_9  | TTTTTCGCTTCTCGTTGGGGCAGGACCACTACAGGTTAATGTC                                                       |
| polyT_10 | TTTTTCTTGTGCTCAACCCGGGGCACGGGGGACTTCTGC                                                           |
| polyT_11 | TTTTTTCAGAAGCCATAGAGCCCACCGCATCCGCCGCGC                                                           |
| polyT_12 | TTTTTGCAGCAGCCACTGGTAGAGGTGCCGTAGAATAAGACACGACTTATCGCCACTGTTTTT                                   |
| polyT_13 | TTTTTCAATAGGCCGAACATTCCGCCTTTTT                                                                   |
| polyT_14 | TTTTTTTTCGGGGCGAAAACCTCCATTGAAAACGTTCTTTTT                                                        |
| polyT_15 | TTTTTGAAGTGGTGGCCGTACAGGATTAGCAGAGTTTTTTTTTTTCGAGGTATGTATTCGGGAATTTTT                             |
| polyT_16 | TAATGGCAGCACTGCATACGATACGGTAGCTCTTGGAAAGTCCCGGGTCTGCTCCAAGTTTTT                                   |
| polyT_17 | GTGCTCATTCAAGGAATCAGCTCATTTTTTAACTTTTT                                                            |
| polyT_18 | TGTCACGCAGAGTAAGCAGGGCGGTTGCCGTGCTCCTGAAGAAGATGGTGTCTTTTT                                         |
| polyT_19 | TTTTTGTGTTGCCATTGTGTGATCGTTTTT                                                                    |
| polyT_20 | TTTTTACAGTATTTGGTACCCGGCTACACTAGAAGATTTTT                                                         |
| polyT_21 | ATCTGGCCTTGTCCGGTAACTATCGTTTTTT                                                                   |
| polyT_22 | CCAGTGCTGCCGTAGGTGGCAGAACCCCGTTCAGCTTTTT                                                          |
| polyT_23 | TAGTTCGACGCTTCCGGCGGCCGTTACTAGTGGATCTTTTT                                                         |
| polyT_24 | TTTTTAGGATCTTACAGTTTTGCGCAACTTTTT                                                                 |
| polyT_25 | TTTTTAGCCAGTTACCGCTGTAGTTTTT                                                                      |
| polyT_26 | CTTCGGAACCTACAGAGTTCTTTTTTT                                                                       |
| LP_1     | GTAAGTTATGTAACGCGGAACTCCATATATGGGCTATGAACTAATGACCCCGTAATTGATTACTATTAATAA<br>CTAGTCAATAATCAATGTCAA |
| LP_2     | CCCAGCATGCCTGCTATTGTCTTCCAATCCTCCCCCTTGCTGTCTGCCCCACCCACCCCCAGAATA<br>GAATGACACCTACTCAGACAATG     |

### 2.2.1.7 sc\_EGFP1 20HB-LPv2

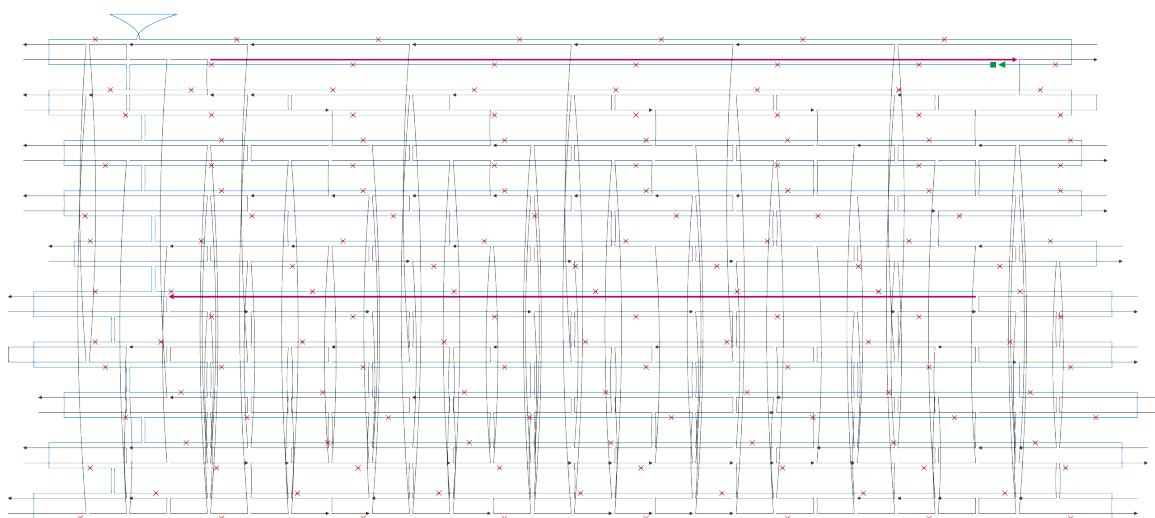

**Fig. S26 | Scaffold routing and staple design for sc\_EGFP1 20HB-LPv2.** Scaffold routing is shown in blue, staples are given in black, breakpoint for addition of sequence is marked by a green square (5') and arrow (3'). Long 154-mer 'primer' sequences at the 5' promoter and 3' polyA regions flanking the EGFP gene are given in pink. Design was prepared using caDNAno v0.1.

**Table S13 | Individual staple sequences for sc\_EGFP1 20HB-LPv2.**

| Name    | Sequence 5' - 3'                                               |
|---------|----------------------------------------------------------------|
| core_1  | GGAACATAACGGAAATGCTGAAGCCGTCGTG                                |
| core_2  | CGTCATTAATTGGCGTTACTATGCGCTTACGACATTTTGGAAAGTCCCGTTGATTCAATGGA |
| core_3  | CGTCAATAGGGGGCGTACTTGGCTCAAACC                                 |
| core_4  | CCCATAAGGTCATGTATGACTAATATCCGAGCTCGGTACGCCAGTGCTAGATCC         |
| core_5  | AATGGGGTAGCTCTGCTTATATAGACTTGTGGGGCACCTGACCCACG                |
| core_6  | GGAGACTTGGAATCCCCGTGAGATATGATATGCAAGCA                         |
| core_7  | CGCCTACCGCCATTTGCATCGCCTTCATCCAATCTGGCC                        |
| core_8  | CCGTACACAAAACAACTCCCATTGACGTCCAGTTTACAACCACCGTGGGTGAG          |
| core_9  | GTAAGCAGTGGGTTTCGACCAGGAGGTCTGACAATAAAC                        |
| core_10 | ATAAGCCAGCTATCCACGCCATTGATGTACTTCATTGAGATCTCAACGATGTAAGTGTATG  |
| core_11 | TATAGTGAGTCGTATTCTCGCCAAATCAATCAGAAGTG                         |
| core_12 | TTCGGGTCAGCTTGCCGTAGGTGGCGTCAATTCGGAAAAGTCCCT                  |
| core_13 | CGCCGGACACGCTGAACCTCCCAGGCAAACACGTAATACTCCACCCATTGACGTTTGGTGC  |
| core_14 | GTCGCCGTCCAGCTCTCTAGTTATTTTGTTCACTTGATGTACTGCCAAGTGGG          |
| core_15 | CACCCCGGTGAACAGCTAATTTTCGAAAAAAG                               |
| core_16 | TGATGGATTGCGCTCCTGGACGTCTCGAACT                                |
| core_17 | GGCATGGCACCATCTCGAGCGGCCAAGCTTG                                |
| core_18 | CTTGTCCGATGTTGTGGCGGATCAGGGTCAAGTTGTCAGGGTCCGAG                |
| core_19 | GCCATGATATAGACGTTGTGGCTCGAGGGTGTACCGCGAATCTCAGC                |
| core_20 | GTTGTAGTAGTGGTCCGGCAGCTGCAACAGAT                               |
| core_21 | GTACTCCAGCTTGTGCCCCAGGAAGCACTGTTTATCAG                         |
| core_22 | ATGTTGCCGGGCCGTCGCCGATGGCGAGGCTG                               |
| core_23 | TCAGCTCGCTCAGGTAGTGGTTGTGACACT                                 |
| core_24 | CAGCACGGTCTCCTTGAAGTCGATGCCCTGTGCTGCTGCCGAGCG                  |
| core_25 | ACTGGGTGATGCCGTTTACCAGGGTGTGCCAGCCTTCGCCGCCTCCTTTTAAA          |
| core_26 | GTTGGGGTCTTTGCTTTGTACAATCGTGGGGGCGCTG                          |
| core_27 | TTTTTTGGAAGTAAGTTGGCGAG                                        |
| core_28 | CGTAACCATCATTTTTTAACCAATTTGTAA                                 |
| core_29 | GCGATGGCCCACTACGCTCATACTGGGCGAC                                |
| core_30 | TAGACCGAGAAAGCGAAAGGAGCGGGCGCTATGTCACGC                        |
| core_31 | AAATCCCTTATAAATAAAGTGCCTGTTGAGATCCAGTT                         |
| core_32 | TTTCAATATTATTGAAAAACCGTGCCTGCTTCCGGTCCCAGTGCTCCGTCCTC          |
| core_33 | GCATTTAGGAAGGCAAAATGCCGGTAGCTC                                 |
| core_34 | ATTGCTCATGAGCGGAAGAACGTCCGTAAGACCCCATGCTCACCAGGTGCTGGT         |
| core_35 | ATACATATTTACCAGCGTTTCTGGTAGC                                   |
| core_36 | TATTTAGAAAAATAATGTTCCAGCTCAACCAGTTCCCAACAGCCAG                 |



|          |                                                                                                                                                                   |
|----------|-------------------------------------------------------------------------------------------------------------------------------------------------------------------|
| core_37  | ACAATAGGTGCACCCAAGTATCGCAGATT                                                                                                                                     |
| core_38  | CGCACATTTCCCCGACAAAAGAACGGCGACTCGTCGTTGTCCTGC                                                                                                                     |
| core_39  | TTCAGCAGGTGAGTATTTGGAAAAGCCGGCGAACGTGGCGAGAAAAG                                                                                                                   |
| core_40  | TTCGGGGCGAAAACCTCGACGCTCAATCTTCAC                                                                                                                                 |
| core_41  | TTACTGTCAAAAACATCAGGGTTGGACTATAAAGATACCAGGCGTTTTCCCCCTG                                                                                                           |
| core_42  | CATGCCATGGACTCCGGGAGCCCCGATTTAGAGCTTG                                                                                                                             |
| core_43  | CGAGTTGCTTAAAAATCTTTGATCGGTCTCCCCGCATCACCATGGTAATAGCGACTGGGCA                                                                                                     |
| core_44  | TCTTGCCCTTACCGACCTAAATAAGGCCGCGTTGCTGGCGTTTTTCCATAGGC                                                                                                             |
| core_45  | TAATACCGAAAAAGGGTGAACGACTAGTGG                                                                                                                                    |
| core_46  | CTCCGATCGAAGGCACGGGGAGGGGCAACACGCTGGCAATGAGGCCAGG                                                                                                                 |
| core_47  | TTAGCTCCTAATTCTGATCTGTCTTGATCC                                                                                                                                    |
| core_48  | AAAAGCGGACCCTAAAAACGTCAAAGGGCGAA                                                                                                                                  |
| core_49  | TTGTGCAAGGCTGGCAACTAGAAGGCACAGTGGGTGTTCTCCAGACACGCCG                                                                                                              |
| core_50  | ACATGATCTGCTTTTAAATGCTTAGGTGGTTGCCAGAG                                                                                                                            |
| core_51  | GGCGAGTTACGGGGAACAAGAGTCCACTATTA                                                                                                                                  |
| core_52  | CGATCAAATCAGCGAGCTCTAGCATTAGGTCCGGGCGAGCCGGAAGGTCATGTGG                                                                                                           |
| core_53  | CAGTCCGAGTCAATTATATATGAACGCGCAG                                                                                                                                   |
| core_54  | GCTTCATTGAAGGGAAGATAGGGTTGAGTGT                                                                                                                                   |
| core_55  | TGGTATGATAGAATAGGGCCCTCTAGATTACCAGGGCGGAACTTTAT                                                                                                                   |
| core_56  | ATCCAGTCTACAGGGCGCTCGTCCATGCCGAGAGTATCTGTGATCG                                                                                                                    |
| core_57  | TAGTTGCCCTCATGGGGGAATAACTTCCCTGAAGCTCCCTCGTGCCTCTCCC                                                                                                              |
| core_58  | TATTCGCTCGCCCTGCACGGGCAGCTTGCC                                                                                                                                    |
| core_59  | ATCAGTGACCGTTTACTAGGTCAGGGTGGTCA                                                                                                                                  |
| core_60  | CAGTTACCCTGTGACTTCTTTACTTTGAATGACGCTCAAGTCAGAGGTGGCGAAAACCCGACA                                                                                                   |
| core_61  | GTAACCTTTGGGCACTCGGGGTAGCGGCTG                                                                                                                                    |
| core_62  | CTAAAGTCTGAGAATACCCACTCGGGTTCGTCGGCCCCCTGACGAGCATCACAAAAATCG                                                                                                      |
| core_63  | AAAGAGTTGCAAAAAATTATGGCACTATCAGGGTCCGTAAGCACTAAATCGGA                                                                                                             |
| core_64  | GAAGATCGAAGTTTTCTTGTCTCGGACTTGAAGAAGTC                                                                                                                            |
| core_65  | TTTTCTACTAATGCCAGGCGGGCCATTTACCGGCCAAAA                                                                                                                           |
| core_66  | GGGGTCTTCAAGGATGGCGTCAAAATCGGCAGCAAGTGTAGCGGTG                                                                                                                    |
| polyT_1  | TTTTTAGCAAAAGGCCAGCAAAAGGCCAGGAACCGTAAATGTAAGCGTTAATATTAGGCCGA                                                                                                    |
| polyT_2  | TTTTTGTCCGCTTTCTCCCTGCTTACCGATTAGGTGTAATATGAACCA                                                                                                                  |
| polyT_3  | TTTTTCTTCTCATAGCTCATCGGGAA                                                                                                                                        |
| polyT_4  | ACGTAGATGTACTGCCAATTTTTTTTTGTAGGAAAGTTCAATGAGTGTTTTT                                                                                                              |
| polyT_5  | TTTTTCTGGCGGCCGTTAAAACTCACGTTAAGGGATTTTT                                                                                                                          |
| polyT_6  | TTTTTTTTTTGTGTAGGTCGTAGACACTAGAAGAACAGTTTTTTT                                                                                                                     |
| polyT_7  | TTTTTGTGCTCCTTGAAGGAAGCTAAGATTATC                                                                                                                                 |
| polyT_8  | TTTTTTTTTTTGCACGAACCCCGCCTTGATGCCGTTCTTCTGGGTGGTGGCTTACC                                                                                                          |
| polyT_9  | TTTTTACTCCAGCAGGACCACGGCGGCTTTGCGC                                                                                                                                |
| polyT_10 | TTTTTGCCTTATCCGGTAATGGCACCTTCTTGAAGT                                                                                                                              |
| polyT_11 | TTTTTCGCGCTTAATGTCACATTCGGCTCAACGCTGCGAACGTTGT                                                                                                                    |
| polyT_12 | TTTTTTAAGACACGACTTATCCCCTAATCAAGGAGCTATCGTCTTGAGTCCAACCCGGTTTTT                                                                                                   |
| polyT_13 | TTTTTGTAAATCAGCCACACCCGCTTTTTT                                                                                                                                    |
| polyT_14 | TTTTTGTGCTCATCATTGGAAAGCAGAAGTTAAAAATTTTT                                                                                                                         |
| polyT_15 | TTTTTGTAGGCGGTGCTTTCAGCCACTGGCAGCAGCTTTTTTTTTTCACTGGTAACAGGATACCTTTTTT                                                                                            |
| polyT_16 | ACACGCAGTGTATCATGACTCCCCAGTTACCTGGGGCGGAGTTGTGTAGGTATCTCAGTTTTTTTT                                                                                                |
| polyT_17 | TACGGGATGCCATTGCTATTAATCGCTTCTCTCACCTCGGCGCGGGTCTTGTAGTTGCCTTTTT                                                                                                  |
| polyT_18 | CGCCACATAACGTTCAATTCGCGTAAATTTTTTTTTTTTT                                                                                                                          |
| polyT_19 | TTTTTCGCCAGTTAATAGGGTCACGATTTTTT                                                                                                                                  |
| polyT_20 | TTTTTCTAACTACGGCTATATTCTTGAAGTGGTGGCTTTTTT                                                                                                                        |
| polyT_21 | ACTACGATTCATTACGCCGACCGCTTTTTT                                                                                                                                    |
| polyT_22 | ACGGGAGGCAGATGAACTTCAGCTCCAAGCTGGGCTGTTTTT                                                                                                                        |
| polyT_23 | TGTTGCCGGAAGATGGATCTGCAGAATTCAGCACATTTTT                                                                                                                          |
| polyT_24 | TTTTTTTTTGGTCATGGAGTAAGTAGTTTTTTTT                                                                                                                                |
| polyT_25 | TTTTTATTTGGTATCGCGTGGCGTTTTT                                                                                                                                      |
| polyT_26 | TGCGCTCTCAGAGCGAGGTATTTTTT                                                                                                                                        |
| LPv2_1   | TTGACGTCAATGGGCGGGGGTGGTGGGCGGTGAGCCAGGCGGGCCATTTACCGTAAGTTATGTAACGC<br>GGAACCTCATATATGGGCTATGAACTAATGACCCCGTAATTGATTACTATTAATAACTAGTCAATAATCAAT<br>GTCAACGCGTATA |
| LPv2_2   | GAAGCCATAGAGCCCACCGCATCCCCAGCATGCCTGCTATTGTCTTCCAATCCTCCCCCTTGCTGTCCT<br>GCCCCACCCACCCCGAATAGAATGACACCTACTCAGACAATGCGATGCAATTTCTCATTATTATTAG<br>GAAAGGACAGTGG     |

### 2.2.1.8 sc\_EGFP1 20HB-Circ

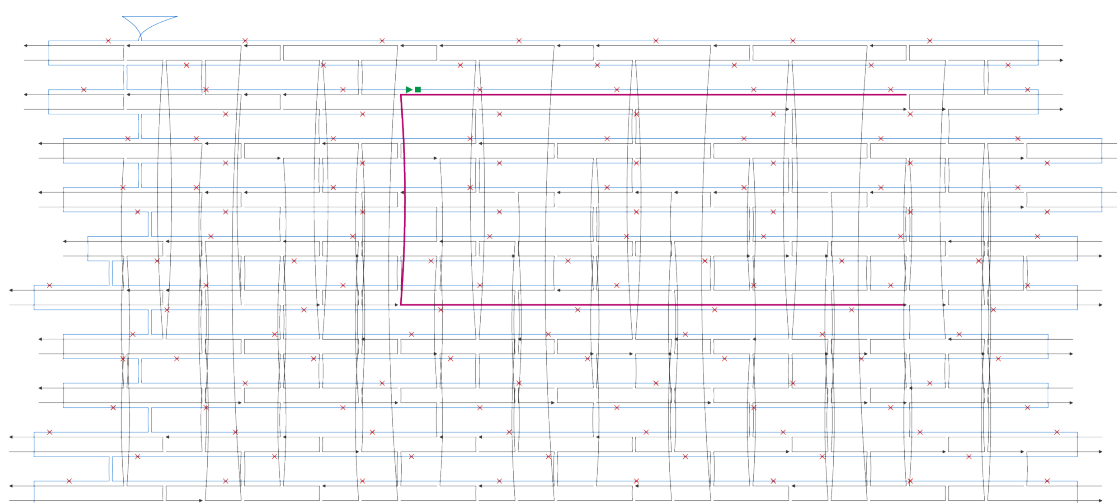

**Fig. S27 | Scaffold routing and staple design for sc\_EGFP1 20HB-Circ.** Scaffold routing is shown in blue, staples are given in black, breakpoint for addition of sequence is marked by a green square (5') and arrow (3'). Long 200-mer 'primer' sequence linking the 5' promoter and 3' polyA regions flanking the EGFP gene is given in pink. Design was prepared using caDNAo v0.1.

**Table S14 | Individual staple sequences for sc\_EGFP1 20HB-Circ.**

| Name    | Sequence 5' - 3'                                                |
|---------|-----------------------------------------------------------------|
| core_1  | TCAGAGGGGCGAGAAAGGAAGGATAAATCA                                  |
| core_2  | AGATACCTTAGAGCTTGACGGGGAGTGT                                    |
| core_3  | TACCTGTCAGGCGGGCCATTTACCTGACGTC                                 |
| core_4  | ATCAATGAAAAATCGACGCTCAAGCTTATCCG                                |
| core_5  | TACGGCCATTTACCGTCATTGACGTCAATAGGCAAAAGG                         |
| core_6  | GGGGCGTATCCATAAGGTCATGTTGGGTCTC                                 |
| core_7  | CTTGGCATATGATACACTTGATGTACTGCCAAATACGTAGATGTACCGATAAGC          |
| core_8  | AGTGGGCAGTTTACCGTAAATACTCCACCCAAAACCGCATCACCATTAGCCAGAAGTCGAGG  |
| core_9  | ACCGCTATCCACGCCACCGTACAACAACAGATGGGGG                           |
| core_10 | GGGTGGAGACTTGGAATGGGGCGCCAGGGTAGCTGCACGAAGCATTAAAAGGG           |
| core_11 | TCTTCCGAGCTCGGTACCAAGCTACTGGGCA                                 |
| core_12 | CTTATATAGACCTCCATTGATGTACTGCCATTGACGTCAATGGAAAGTCCCTATTGGCGT    |
| core_13 | ATATCTGGAGTCGTATTAATTTTGCCAAGTTTCCGCT                           |
| core_14 | TCACCATCAGTGGGTCTCTAGTGGTAATAGCGATGACT                          |
| core_15 | TACGTGCCCCGCCATTTGCGTCAAATCCCCGTGAGTCAATACTATGGGAACATACGTATTAT  |
| core_16 | GTGCGCTCCCTCGGCGCGGGTCTACTCTCA                                  |
| core_17 | CTGGACGTAGCCTTCGGGCATGGTGTGATGGGGGGTCTTCTATAGAAAATCCCTTGAAGAAAG |
| core_18 | CGGACTTGCGGTTCCACAGGGTGTGAGTTCGA                                |
| core_19 | AAGAAGTCGTGCTGCTTCATGTGGCCCTTGCAGGTAGTGTGATCAGATAGGGTTAAAGCCG   |
| core_20 | GTCGGGGTCTCCTTGAAGTCGATGTGATCTTC                                |
| core_21 | TAGGTCAGACTCCAGCTTGTGCCCTTTCTGGG                                |
| core_22 | GCACGGGCTGATATAGACGTTGTTGCCGCAA                                 |
| core_23 | TAGTTGTGGTGGTCACGAGGGTGGGCCAGGTGGCCGTTGTGCGGCAAGGAAGCGTCAAA     |
| core_24 | CCAGCAGGCAGCTCGCATTTTTCTGGCAAGAATTAAGACACGACTTATCGCCACTGGGTA    |
| core_25 | GTTGTGAAACAAATAGCATCTTACCGAGTTGCTCTTGCCCGCGT                    |
| core_26 | CGTCGCCGATGGCTGAGAGTCCAAAGGGAG                                  |
| core_27 | GCTGCCGTGTCGGCCAAGCTTGCCGGTGGTGCAGATGAA                         |
| core_28 | CCTCGATCCTCGCCGTACGACATTTTTGAAAA                                |
| core_29 | TACTTGTAAACCATGTGATTTGTAGGATCTTAAGTGCTCATCATTGGAAAACGT          |
| core_30 | CTCTAGATCCTATAGTCAGAATCCAGCACAC                                 |
| core_31 | AGGTGACATGCTCAGGAAAAGTGTGTAACCCGATAATACCGCGCCACATAGCAGGGTATGGC  |
| core_32 | GCAACTAGAAAGGCACGAGCTCTGGGTGAACAGCTCCTC                         |
| core_33 | GCACGGGGGAGGGGCACGCCCTACGTCCAGCTCGACCA                          |
| core_34 | GGCACCTTGAGTTGTGACACGCTGAACCTTG                                 |
| core_35 | AACCACCACCAGGAACATAGGCTCCGCCCCCGGTAA                            |
| core_36 | CACCCGCTAGGGCGAACCAATAAGTAGTTCTCACGCTCGTCTTAACTTTAA             |
| core_37 | TGTAGCGGGTTTTCCCGTAAAAAGGCCGCG                                  |

|          |                                                                                                                                                                                                                  |
|----------|------------------------------------------------------------------------------------------------------------------------------------------------------------------------------------------------------------------|
| core_38  | GAACCTACTATTA AAAACCAGCCTAGCTCCTTCGGTCCT                                                                                                                                                                         |
| core_39  | AGGTGCCGGCCTGACTGCTGTAGGTATCTCAGTTCGGTGCTCGTGCGCTAAATCG                                                                                                                                                          |
| core_40  | TGGGGTCGGGGCGAAAAACGCTCACAGTAAAGTTGGCCGCGAG                                                                                                                                                                      |
| core_41  | TAAAATTCGTGGTGGCCAGTTAATAGTTTTCTTTTA                                                                                                                                                                             |
| core_42  | AATTGTA AATCGGCAATAGGGCCATGTACAAGGAAAG                                                                                                                                                                           |
| core_43  | CCACCTATTCATTCAATTGTTGCCGGGAAG                                                                                                                                                                                   |
| core_44  | AGGGGTTGAGTTAGCAACTTTATCCGCC                                                                                                                                                                                     |
| core_45  | AGAAAAATGGCAGCAGTGCCGTCAGCGGCTGAAGCACTGCACGCCGGGATGGGC                                                                                                                                                           |
| core_46  | TATTTGAAAAGCGGTAGCCGGAAGGGCCGA                                                                                                                                                                                   |
| core_47  | CGGATACATGAGCAAACCAAGTCATTCTGAGAATAGTGTGTGCAAAATGTATTTTTGGAACA                                                                                                                                                   |
| core_48  | TATCAGGGTTGTCCAGACGGCTCCAGATTTATC                                                                                                                                                                                |
| core_49  | ACCGCTGTTGAGATCCGCCCTCTTCTCGTT                                                                                                                                                                                   |
| core_50  | ACTCGTGCACCCAACCCCTTCAGGGTGCTC                                                                                                                                                                                   |
| core_51  | TTACTTTTACCAGCGCAGGATGTCACGGGGCACCACCCC                                                                                                                                                                          |
| core_52  | TACTCAAACAGGAAGGCAAAAAGGCTGTTGTGGTAGTG                                                                                                                                                                           |
| core_53  | AGATGCTTTTTCTGTGACTGGTGAGCCGATCGTTATTGTGACTCCA                                                                                                                                                                   |
| core_54  | ATCCGTAAATAAGGGCGACACGGTTCTGCTT                                                                                                                                                                                  |
| core_55  | GATCAAGGCCGCGCACAGACCGAGCGAGCTCTAGCATTTTCAGTAAGCTCGAGCGGCCGCCAG                                                                                                                                                  |
| core_56  | GTCTATTAGCTCCGGTTCCCAACCAATACGG                                                                                                                                                                                  |
| core_57  | GTGGTCCTCATGATCCCCCATGTTATGCGGCG                                                                                                                                                                                 |
| core_58  | GCTGCAATGATACCGCACTACGACCTAATC                                                                                                                                                                                   |
| core_59  | ATGAAGTTTTAAATCCTAGAGTAGGCCGAAGCGTTAATATCGCGGAACCTCA                                                                                                                                                             |
| core_60  | AATCTAAACGAAAGGACATCACAGTGAGCAAAAAGGCCA                                                                                                                                                                          |
| core_61  | GTATATATGTA AACTATCGTCTTGAGTCCAACCTGACGAGGCGGCGCGCTTA                                                                                                                                                            |
| core_62  | GAGTAAACTTGGTCTTCCATCCAAAAGAATATTTCCCGGCGGACTGCTCGATG                                                                                                                                                            |
| core_63  | GACAGTTAGCGAACGTTGGCGAAAACCGACAGGACTATAAACGAACCC                                                                                                                                                                 |
| core_64  | CCAATGCCCGTTTCAGCCCGACCGCTGCGC                                                                                                                                                                                   |
| core_65  | TTAATCAGTGAGGCACGCGCAGAAGTTCAGT                                                                                                                                                                                  |
| core_66  | CTATCTCACCCCGATAGGCGTTTCCCCCTGGAAGCTCCTAGGTCGT                                                                                                                                                                   |
| core_67  | GCGATCTTCGCTCCAAGCTGGGCTGTGTGC                                                                                                                                                                                   |
| core_68  | GTCTATTTCTGTTTCATCAGCAATAAGAACGTGCTCATGAGTGTCTGC                                                                                                                                                                 |
| core_69  | CATAGTTTAAAGCACTCTCCTGTTCCGACCCTGCCGCTAGCTCAC                                                                                                                                                                    |
| core_70  | CCCCGTCGTGTAGATAGAGACCCAACCGTCTTATTATT                                                                                                                                                                           |
| polyT_1  | TTTTCTCCTCGGGAAGCGTGGCGCTTTCTCATTACCGGAAAGTTTTACACCTAC                                                                                                                                                           |
| polyT_2  | TTTTCGAGGTATGTAGGCGGACAGGATTAGCAGAGTTTTT                                                                                                                                                                         |
| polyT_3  | TTGCTGGCTCAGTTTTGCAAGCAGCAGATTTTTT                                                                                                                                                                               |
| polyT_4  | TTTTTGCGGTCAGCCCGCTTTCTCTTTTT                                                                                                                                                                                    |
| polyT_5  | TTTTTGAAGTGGTGGCCTAACTGCTACAGAGTTCTTTTTT                                                                                                                                                                         |
| polyT_6  | CCATTGATGCGATGCAATTTCTCATTITTT                                                                                                                                                                                   |
| polyT_7  | TTTTTGTGCCAAAACAACTCGTCCCGTTGATTTTTGTTTT                                                                                                                                                                         |
| polyT_8  | TTTTTACAGTATTTGGTATCCTCCGGCAAACAACTTTTT                                                                                                                                                                          |
| polyT_9  | CCCTCGCGTTGTGGCAAAGGACAGATGGCCCACTATTTTT                                                                                                                                                                         |
| polyT_10 | TTTTTGCCGTAGGTGGCATCGCTTCAGGGTCAGCTTTTTTT                                                                                                                                                                        |
| polyT_11 | TTTTTCACTTACCTTCGGAAAATCGTCTTGAAGAAGATGTGGCGGCC                                                                                                                                                                  |
| polyT_12 | TTTTTTTACCTTGATGCCGTTCAAATGTTGAATATTTTT                                                                                                                                                                          |
| polyT_13 | TTTTTCTTGACGGATCTCAAGAAGATTTTTT                                                                                                                                                                                  |
| polyT_14 | CACGAACTGTTACTAGTGGAGCGCTCTGCTGAAGCTTTTT                                                                                                                                                                         |
| polyT_15 | GTGGGAGTTTACAGACAACGTC AATGAATGGCGGGGGTCTGGTTTTT                                                                                                                                                                 |
| polyT_16 | TTTTTTTTTATTAGGGGATCTTGAAGTTTTT                                                                                                                                                                                  |
| polyT_17 | TTTTTACCGCTGGTAGCGGTGGTTTTTTTCGCGAGAGTGA                                                                                                                                                                         |
| polyT_18 | TGCGCGTTAATGCCAGGCGGGCTACACTAGAAGATTTTT                                                                                                                                                                          |
| polyT_19 | TTTTTCGTGAACCATCACTACGGGAGGGCTTACCATCTTTTT                                                                                                                                                                       |
| polyT_20 | TTTTTACGCGCAGAAATGGATTTTGGTCATGAGTTTTT                                                                                                                                                                           |
| polyT_21 | TTTTTCTATACTCTTCCACTCATGG                                                                                                                                                                                        |
| polyT_22 | TTTTTCCTTTGATCTTTTCTACTCGGGGCGAAATGTAGTTG                                                                                                                                                                        |
| polyT_23 | TTTTTCTGCATAATCTCTTACTGTATGCCTGTTATCTTTTTCAAATCAGGGC                                                                                                                                                             |
| polyT_24 | TTTTTAAACTCACGTTAAGGTTGCCATTGCTCTGGGGTCTGACGCTCAGTGAACGTTTTT                                                                                                                                                     |
| polyT_25 | TACAGGCAGCGTTAAATTTTTAGGCGCGGTCAGAGAGTTGGTAGCTTTTTT                                                                                                                                                              |
| polyT_26 | TTTTTTGGCCCCAGTTTATGGCAGCATTTTT                                                                                                                                                                                  |
| polyT_27 | TTTTTATTATCAAAAAGGATCTTACCTAGAGCGCAACGAAAGTTAAATCAGCTTCCATGCC                                                                                                                                                    |
| Circ_1   | GTAAGTTATGTAACGCGGAACCTCCATATATGGGCTATGAACTAATGACCCCGTAATTGATTACTATTAATAA<br>CTAGTCAATAATCAATGTCAACGCGTATCAGAAGCCATAGAGCCCACCGCATCCCCAGCATGCCTGCTATT<br>GTCTTCCAATCCTCCCCCTTGTCTGCTGCTGCCCCACCCACCCCCAGAATAGAATG |

## 2.2.2 sc\_EGFP2

### Scaffold sequence for sc\_EGFP2:

gtcgggttcgccacctgactgagcgtcgattttgtgatgctcgtcaggggggaggagcctatggaaaaacgccagcaacgaggcctttta  
cggttcctggccttttctgctgcttctgctcactcattcgcctcagaagccatagagcccaccgcatcccagcatgctgctattgtcttccaatc  
ctcccccttctgctcctgccccacccccccccagaatagaatgacacctactcagacaatgcatgcaatttctcattttattaggaaggga  
cagtgaggagtgccacctccagggtcaaggaaggcacgggggaggggcaacaacagatggctggcaactagaaggcacagtcgagg  
ctgatcagcagctctagcatttaggtgacactatagaataggccctctagattctgtacagctcgtccatgccgagagtgatcccggcggc  
ggtcacgaactccagcaggaccatgtgatcgcgcttctcgttggggcttctgctcagggcggactgggtgctcaggtagtggttgcggcagc  
agcacggggccgctcggcagtggggggttctgctggttagtggtcggcagctgcacgctcggctcctcgtatgttgggcggatctgaagttcac  
cttgatgccgttcttctgcttgcggccatgatatacagcttggctgtttagttagtactccagcttggccccaggatgttgccgtcctcctgaagt  
cgatgccctcagctcgtatgcggttaccagggtgctgcctcgaactcactcggcggggtctttagttagtgcctgaagaagatgg  
tgcgctcctggacgtagcctcgggcatggcggacttgaagaagtcgtgctgcttcatgttggtcgggtagcggctgaagcactgcacgcccga  
ggtcaggggtggtcacgagggtggccaggggcacgggcagcttccgggtggtgcagatgaactcagggtcagcttgcgtaggtggcatcg  
ccctcggcctcggcggacacgctgaacttggccgttaccgtcggctccagctcagaccaggatgggcaccacccccggtaacagctcctc  
gcccttctcaccatctcagcggccgaccagtgatggatctcgaagaattccagcacactggcggcgttactagtgatccgagctcggg  
accaagctgggtctccctatagtgagctgattaattcgaataagccagtaagcagtggggttctctagttagccagagagctcgtctatatagac  
ctcccaccgtacacgctaccgcccatttgcgtcaatggggcggagttgttacgacattttgaaagtcgggtgattttggccaaaacaaact  
cccattgacgtcaatggggtggagacttggaaatccccgtgagtcacaccgctatccacgcccattgatgactgcccacacccgcatcaccat  
ggtaatagcgtactaatacgttagatgactgccaagtaggaaagtcaccataaggctcatgactgggcataatgccaggcgggcccattacc  
gtcattgacgtcaataggggctgacttggcatatgatacactgtatgactgccaagtgggcagttaccgtaataactccaccattgacgtca  
atggaaagtccttattggcgttactatgggaacatacgtcattattgacgtcaatggcgggggctggtggcggctcagccaggcgggcccattta  
ccgtaagttatgtaacgcggaactccatataatgggctatgaactaatgaccccgtaattgattactattaataactagtcataatcaatgcaacg  
cgtatatactgtgacattaagcgcggcgggtggtggttaccgcgacgctgaccgctacacttgcagcgccttagcggcccgtccttctgcttctc  
ttcccttcttctcggcagcttgcggcgttccccgtaagctctaaatcgggggctcccttagggttccgatttagtgccttacggcacctcgacc  
ccaaaaaactgattaggggtgattggtcacgtagtgggccatcgcctgatagacggttttcggcctttagcgttggagtcacgcttcttaatagt  
ggactctgttccaaactggaacaacactcaaccctatctcggctattcttttgattataagggattttgcccatttgcgcttattggttaaaaaatg  
agctgatttaacaaaaatgacgcgaattttaacaaaatattaacgcttacaatttagtggcacttttcggggaaatgtgcgcggaaccctatt  
tgtttattttctaaatacattcaaatatgtatccgctatgagacaataaccctgataaatgctcaataatattgaaaaggaagagatgagatg  
caacatttccgtgctcgccttattccctttttgcgccatttgccttctgcttcttctcaccagaaacgctggtgaaagtaaaagatgctgaagatc  
agttgggtgacagagtggttaccatgaactggatctcaacagcggtaagatcctgagagtttgcggcgaagaacggttccaatgatgagc  
acttttaagttctgctatgtggcgggtattatcccgtattgacggcgggcaagagcaactcggctcggcgcatacactatttcagaatgacttgg  
ttgagtagtaccagtcacagaaaagcatcttaccggatggcatgacagtaagagaattatgagtgctgcccataaccatgagtgataaactg  
cggccaacttacttctgacaacgatcggaggaccgaaggagtaaccgctttttgcacaacatgggggatcatgtaactgccttgccttgccttgg  
gaaccggagctgaatgaagccatacacaacgacgagcgtgacaccacgatgctgtgcaatggcaacaacggtgcgcaactattaact  
ggcgaactacttacttagcttcccggcaacaattaatagactggatggaggcggataaagttgcaggaccacttctgcgctcggccttccgg  
ctggctggttattgctgataaatctggagccggtgagcgtgggtctcgggtatcattgcagcactggggccagatgtaagccctcccgtatc  
gtagttatctacacgacggggagtcaggcaactatggatgaacgaaatagacagatcgtgagataggtgcctcactgattaagcattggttaa  
ctgtcagaccaagttactcatatatacttttagattgatttaaaactcatttttaattaaaaggatctaggtgaagatccttttgataatctcatgacc  
aaaatcccttaacgtgagtttctgctcactgagcgtcagaccccgtagaaaagatcaaggatctcttgagatcctttttctgcgctaatctgc  
tgctgcaacaaaaaaaccaccgctaccagcgggtggttgggttgcggatcaagagctaccaactctttccgaaggtaactggctcagcag  
agcgcagatacacaataactgttctctagtgtagccgtagttaggccaccactcaagaactctgtagcaccgctacatacctcgtctgcta  
cctgttaccagtggtgctgcccagtgccgataagtcgtgcttaccgggtggactcaagacgatagttaccggataaggcgcagcggctcggg  
ctgaacggggggtcgtgacacagcccagctggagcgaacgacctacaccgaactgagatacctacagcgtgagctatgagaagcgc  
cacgctcccgaagggagaaaggcggacaggtatccggtgaagcggcagggctcggaaacaggagagcgcagcaggggagctccaggggg  
aaacgctggtatctttatagctct

## Corresponding DNA origami designs and staple lists:

### 2.2.2.1 sc\_EGFP2 20HB

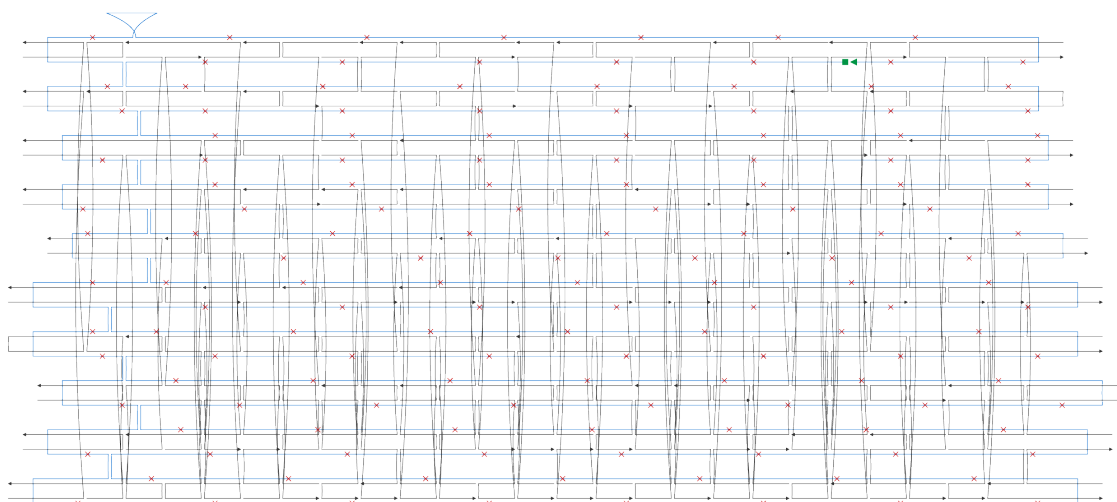

**Fig. S28 | Scaffold routing and staple design for sc\_EGFP2 20HB.** Scaffold routing is shown in blue, staples are given in black, breakpoint for addition of sequence is marked by a green square (5') and arrow (3'). Design was prepared using caDNAo v0.1.

**Table S15 | Individual staple sequences for sc\_EGFP2 20HB.**

| Name    | Sequence 5' - 3'                                       |
|---------|--------------------------------------------------------|
| core_1  | GAAGCTCCCTCGTGCGCTGAGTAGAAGGGCGCAAACCAC                |
| core_2  | GACTATAAAGATACCGGGTGGGGCAGGAAGTTTGCAAG                 |
| core_3  | CCGCCCCCTGACGAGTGGGCTTCGTGCACACGGGGT                   |
| core_4  | CGTTTTTCAAATTCGCGTTAAACCTTATAAATAGCAG                  |
| core_5  | GTGTCATCCGTGCCCTTCTTGACCGACCAC                         |
| core_6  | AATAGCAGAGCTCGCTGATCAGCTACCTGA                         |
| core_7  | AGGCCAGCGCATGGACGAGCTGTATGCTGGAGGACCCCT                |
| core_8  | TCCCACTGTCCTTTCGTGAACATCGAGGACGGCAGCGTGCAGCTCGCCCTGGAA |
| core_9  | CCCCTCCCTCTATTCTGGGGGGTGAGGCGTTT                       |
| core_10 | AGTTGCCAGCCATCTCGACGGCCCCACAACGTCTATATC                |
| core_11 | TGCCTTCTGCAAGGGGGAGGATTGTGGCGAAA                       |
| core_12 | AATGCTAGGCATGCTGGGGATGCGGCATCACA                       |
| core_13 | CTATAGTGACCCCAAGCATCGACTTCAAGGTGCCCGAAGAGTAAACATCCGCCT |
| core_14 | GCTGCCCGACAACCACCTCGACTGAGAAAAAA                       |
| core_15 | GAGCAAAGTCACCTATCTTTTCTCCAAGTGGCTCTTGC                 |
| core_16 | AAGAACGGCATCAAGGGGCCACCCCGGTCGGATACCGC                 |
| core_17 | CAAGCAGTACCAGCAGAACACCCCATCGGGTTGTTTGTGTTTTTGGCAAAATG  |
| core_18 | GGGGCACAAGCTGGAATGAAGCATAATCAGGGGCCGAG                 |
| core_19 | CGCATCGACAGTGAATCTAGAGGTCTGAGGCGAATGAG                 |
| core_20 | GGTGAACCTTCTTCATGAAGTTCGGGAAGGCTCGTCG                  |
| core_21 | GTGCCCTTGAACCTTCTTGATGGTGCCACATTGCATCGCATTGTCTCTCCTG   |
| core_22 | CACCCTGACCTACGGATGGCCGAAGCGGTGG                        |
| core_23 | TTCTTCAAGTCCGCCAAGGACGGCTCCTTTGA                       |
| core_24 | AAGTTCACGCTACCCCGACCACGTACAACCTTACGCGC                 |
| core_25 | CCCATCTGCAACTTTTTGGTCTACCGAGTTATCTTCAG                 |
| core_26 | ACGGTGGTCGTAACAACCTCCGCTTGACGTGCGAGTGTGTTAAATCG        |
| core_27 | TATAAGCAGAGCTCTCGAGGGCGCGGCTCCACGTTTCATC               |
| core_28 | CTGGCTAAGGCACCAAAATCAACGACTGCCATCCTCCGATTAGAGCT        |
| core_29 | CTAGAGAACCCACTGCTTACTGGACGGCCACAGCCGGAA                |
| core_30 | AAGTCTCAATTAATACGACTCACTATAGGG                         |
| core_31 | CGGTTTGACTCACGGTGACGGTCAACGATCGCGGGCGC                 |
| core_32 | TGGATAGGCTTGGTACCGAGCTCGGATCCACAAGGGCGATTGTTGCTTAAATC  |
| core_33 | GTTTTGGCAGTACATCAGTACATTTGGTATCACGCTG                  |
| core_34 | GAGTATTTACGGTAAGGACTTTCGCTCACATGCCAC                   |
| core_35 | ATTATGCCAATGGGCGTCTATTAAGGAGCTGTCCAGGAGCGCACCAT        |

|          |                                                                      |
|----------|----------------------------------------------------------------------|
| core_36  | TGACCTTAAGTAATCAATTACGGGGTCATTATGTAGCGGTGGCTTCA                      |
| core_37  | AACGCCATAAAGCACATCACTCATGGTAAC                                       |
| core_38  | CCGCCATTGACGTCACCCCGATTTCGTTGTCATCCGTAACATAGTTGCGCTGGT               |
| core_39  | ACCGCCGTACATCAAGTGTATCATGGGAGTACCAGCC                                |
| core_40  | CATAACTTCCCCTATTGACGTC AAGGATTTCCGTGGTCCCTGGTCGAGC                   |
| core_41  | CCACCACATTATTAATTGGGACTTTCCTACTTTACCATG                              |
| core_42  | CATCACCCTAATCAAGTATTATTGTA CTATATGAGGAA                              |
| core_43  | GTCTATCAGGGCGATGTCATGAGAAGGGAAT                                      |
| core_44  | CCAACGTCGAAAAATAGCAAAAAACAGGACA                                      |
| core_45  | AGTTTGGAAACAAGAGATTTCCCCATCTTTT                                      |
| core_46  | GAAATCGGCAAAATCTTTTTGTTGATCTTAC                                      |
| core_47  | TATTTGAATGATTTAAAAGGGCGCTGGT GAGGGTTAGCAGCAATAATTGTTTT               |
| core_48  | AGGGGTTCCGCGCACTCCACTATATAGTGTATTACATGACGCAGAA                       |
| core_49  | GAAAAGTGAAAAATCGACGCTCAAGTCAGAGGGGAAGACACTTTTACAGGATCT               |
| core_50  | CCACCTAAATTGTAAGGTTGAGTCCGGCGTTT CAGCTCCCATCCA                       |
| core_51  | CAGCGTTTTCTGAGATAAAGAAAGGAAGGGAAG                                    |
| core_52  | TTCTGTGAAAAACCTGACGGGGAAAGCCGG                                       |
| core_53  | CAATACGGAATCTAAACTGACGCTGCTGAAGGCGAGAAGCGGATCACATGGTCCCAAGTAA        |
| core_54  | TCCCCAAGTACGCACGGTAAATGGCCCGCTGGCTGCGAACGT                           |
| core_55  | CGGTTCCAAATGGCCCCATATATGGAGTTCCGCGTTACGAAAGGA                        |
| core_56  | GGCATCGTAACTTTAACCTTTTAAGGGATTT                                      |
| core_57  | TGTAGATACATAATTATGTTGAAAAGCATT TCCGACCCTGCCGCTTACCGGC                |
| core_58  | CCTGACTCTCGTGACCTACGGCAAGCTGACC                                      |
| core_59  | GCGATCTGGCTTCAGCGCGTGTCCGGCGAGGG                                     |
| core_60  | GTATATATGGCTACGTTACCCGGGGTGGTGAGACCCAA                               |
| core_61  | AATTA AAAAGGACGAGCTCGAGATGGTGAGCTAGTAAC                              |
| core_62  | CCGGCAAAACACGGAACCTTACTACGTGAACGAACCTAAAGGGAGCATAATGA                |
| core_63  | CTAATAAAACTCTTCCAAAAAGAGACGGGAGTGCCGGCAAGCTGCC                       |
| core_64  | CGTGCAGTTCTATTTGATTTATCTCCTTCGGCTTGGCAAACGACCC                       |
| core_65  | TGACGTCAATATGCCATGTTGTGCGGCGAGAACGTGGACT                             |
| core_66  | GTTGTTCTAGGGCGCTGGCAAGGTT CATAGCGCTGGC                               |
| core_67  | AATAGACCGAGATAGGCGTTAATTAACCCACCTATGGCTGCCCTATT                      |
| core_68  | TATCAGGGTTATTGTGCGCCACTGTCATGCCAGAAGTAGAGCCCAAAAATGGAGGTCTA          |
| core_69  | GATGCTTCCGCAAAACGGATACACCCCTG                                        |
| core_70  | GATAACTTTCGATGATTTTGTTCATAGGCT                                       |
| core_71  | AGTTGGCCAATGGGTGCGTATGTTCCCATAGT                                     |
| core_72  | AAAAAAGCTACTCAACTATCTCACAGCAGAACAACAGCCGTGCT                         |
| core_73  | AAGGCGAGTGCGGCGGACAGTTACAAGAAGAAACATCCTGCACCCAGTCCGCCCT              |
| core_74  | TGAGGCACCCAAGTCACTG GGGTAAACAAATCCCACAG                              |
| core_75  | CCAATGCTGCACGACTGGACGGCGACGTAACCTTATCGACACCCCAT                      |
| core_76  | CGAAAACAGATCCAGCGCGCCACATCAAAGCGCGTAA                                |
| polyT_1  | TTTTTGAACCGTAAAAAGCCGCGTTGCTGGTGAGCAAACGCTGTTGTACAGTTA               |
| polyT_2  | TTTTTAAGCGTGGCGCTTTCTCTTTCTCTAGGCGGTTTTTCAATTTTTTG                   |
| polyT_3  | TTTTTAGGTATCTCAGTTCGCATAGCT                                          |
| polyT_4  | TCGAGGGCTTCGTGACCGCCGCGGGTTTTTTTTTATCACTCTCGAAAAGGCCAGTTTTT          |
| polyT_5  | TTTTTCCGAGGTGAAGTTGGTCA TGAGATTATCAATTTTT                            |
| polyT_6  | TTTTTAGCTGGGCTGTGGGCGTATCTGCGCTCTGCTTTTTT                            |
| polyT_7  | TTTTTATCCATCACAGCCAGTTAACCTAGAT                                      |
| polyT_8  | TTTTTCCCGACCGCTGCGCCTAAATGGGCGGTAGGCGTGTCTGAAGTCTGCAAT               |
| polyT_9  | TTTTTATTAGTCATCGCTATGGCAGTATGCTACAGCTTAATG                           |
| polyT_10 | TTTTTGTCTTGAGTCCAACCCGGGACTTTCCACCATTGA                              |
| polyT_11 | TTTTTACGCGTTGACATTGATTATTGACTAGCCCGCCCGC                             |
| polyT_12 | TTTTTTGGCAGCAGCCACTGGTTCGAGGTGCCGATAGGTAAGACACGACTTATCGCCACTTTTT     |
| polyT_13 | TTTTTACCAATAGGCCTCACAGATATTTTTT                                      |
| polyT_14 | TTTTTCTTCCGGGCGAAAAACATCATTGGAAAAACGTTTTTT                           |
| polyT_15 | TTTTTTGAAGTGGTGGGGGTAACAGGATTAGCAGTTTTTTTTTTAGCGAGGTATGCCTTCGGGTTTTT |
| polyT_16 | CCTTATGGCAGCACTGACTACGATTTGGTAGCCAAGATCCGCCACTAGGTCGTTCCGCTCCATTTTT  |
| polyT_17 | AAGTGCTCTCTCAAGAAATCAGCTATTTTTTATTTTT                                |
| polyT_18 | GGTGTACCTAGAGTAGTGATGCGGGCCGCCAGTGTGCTGGAATTCTGCAGATTTTT             |
| polyT_19 | TTTTTACGTTGTTGCCATCATCTACGTTTTT                                      |
| polyT_20 | TTTTTGAACAGTATTTGTTATACGGCTACACTAGAATTTTT                            |
| polyT_21 | CCATCTGGCGCTATCCGGTAACTATCTTTTT                                      |
| polyT_22 | CCCCAGTGTCTATCTGCACCACACGAACCCCCGTTTCAATTTTT                         |
| polyT_23 | AGTAGTTCTGGCGCCCGGCAACTACAAGACCCGCGTTTTT                             |
| polyT_24 | TTTTTAAAGGATCTTCATAGTTTTCGCGATTTTT                                   |
| polyT_25 | TTTTTGAAGCCAGTTCACGCTGTTTTT                                          |
| polyT_26 | ACTTCCGGTGCTACAGAGTCTTTTT                                            |

### 2.2.2.2 sc\_EGFP2 20HB-LPv2

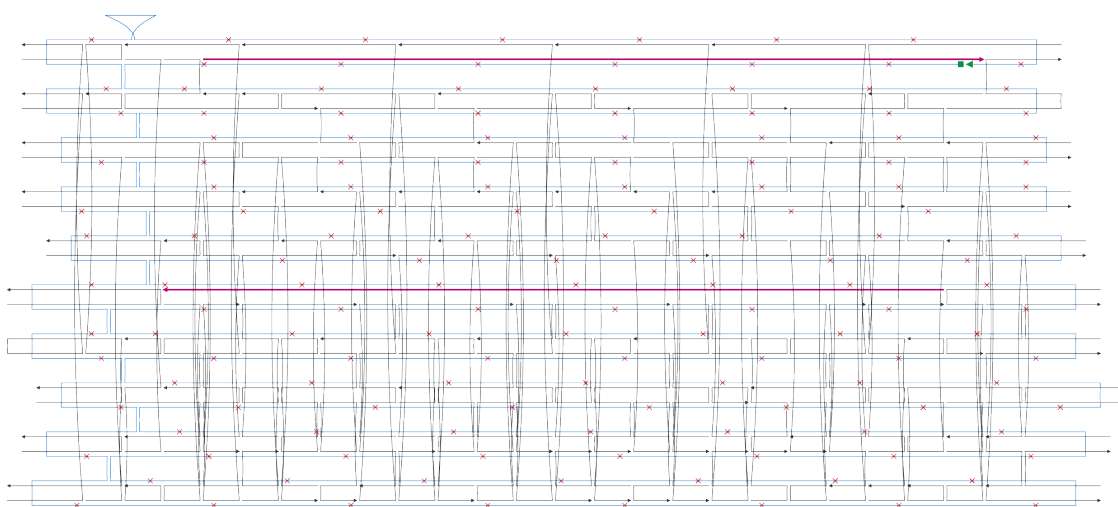

**Fig. S29 | Scaffold routing and staple design for sc\_EGFP2 20HB-LPv2.** Scaffold routing is shown in blue, staples are given in black, breakpoint for addition of sequence is marked by a green square (5') and arrow (3'). Long 154-mer 'primer' sequences at the reverse complement sequences for the polyA (5') and promoter (3') regions, flanking the EGFP gene are given in pink. Design was prepared using caDNAo v0.1.

**Table S16 | Individual staple sequences for sc\_EGFP2 20HB-LPv2.**

| Name    | Sequence 5' - 3'                                                |
|---------|-----------------------------------------------------------------|
| core_1  | GGTGCCACACACGGAAGCTGCTGAACCCGTCG                                |
| core_2  | TCCCCTGTCCCTTGACCCTGGAACACAGGTGAACTTCAAGATCCGCCACAACATCCCCTCCC  |
| core_3  | GCCCTATTCTATAGTGTACCTACCGTGCT                                   |
| core_4  | GACCGCCGCGGGATCCGAGAAGCGCCGAGGTGAAGTGGCTACGACCTAGAT             |
| core_5  | TACCAGCAAAGCTGGAGTACAACCTCTCGTGACGAGGCACGAGACCCA                |
| core_6  | GAACACCCCCATCGGCGACGGCCAATGCTAGTTTGCAAG                         |
| core_7  | TCTATATCATGGCCGACACCGGCACGTTTCATCCCATCTGG                       |
| core_8  | CACAACGGCAGCGTGCAGCTCGCCGACCACTGCCTTCTCAAACCACTCTGGGTG          |
| core_9  | TTCAAGGAGGACGGCGCTTACGCTTGGTCTAGCAATAA                          |
| core_10 | GCATCGACGCTGCCCCGACAACCACTACCTGAGCTAGAGGAGGATCTCTTCGATGATAGTGTA |
| core_11 | GGTGAAACCGCATCGAGCACGACTTTAAATCACGCAGAAG                        |
| core_12 | CGTACCCTGAAGTTCATCTGCACCAAGCAGCCTTCGGCCGTGCCT                   |
| core_13 | GTGCCCTGGCCACCACAACAGCCCGCAAAGTTGCCAGCCATCTGTTGTTTGCAGGACG      |
| core_14 | CCTACGGCGTGCAGTAACATCCTTTTTTTTGTAGCTCGCTGATCAGCCTCGACTG         |
| core_15 | CCGACCACATGAAGCAGCTGAAGGAGAAAAAA                                |
| core_16 | TCCAGGAGAGATATCCATCACACGCTTGGTA                                 |
| core_17 | GCTCGAGAGTCCGCCATGCCGAATCGAGGGC                                 |
| core_18 | ACGCAAAAATCAACGGGACTTTCGTAACGCCTCGTTGTGCGGGGTCG                 |
| core_19 | TGGGCGGTAGGCGTGTACGGTGAAGTTCAGGATACCGCCTATCTCA                  |
| core_20 | GAGGTCTATGACGTCATGGGAGTAATGGGTG                                 |
| core_21 | TATAAGCAGAGCTCTCTGGCTAAGGTCGAGCGATTTATC                         |
| core_22 | CTAGAGAACTCACGGGGATTTCCCTTGGCAG                                 |
| core_23 | AATTAATAAGTACATCAATGGGCAGTACGC                                  |
| core_24 | CGGTTTGCCCACTGCTTACTGGCTTATCGAAGGAGCTGGGGCCGAG                  |
| core_25 | GTTTTGGCCGACTCACTATAGGGAGACCCAATGGCGGCCATCCGCTCCTTTTA           |
| core_26 | ATCGCTATTACCATGAATGGCCGCATCGTTAGGGCGC                           |
| core_27 | AGTTTTTTAGAAGTAAGTTGCAAG                                        |
| core_28 | CGCGTAACGCTCATTTTTTAAACATTTTGT                                  |
| core_29 | GGCGATGGCCCACTATACTCATAAAGGGCG                                  |
| core_30 | AATAGACCAAGAAAGCGAAAGGAGCGGGCGCGGTGTACAC                        |
| core_31 | CAAAATCCCTTATAAGAAAAGTGCAGTGTGAGATCCAG                          |
| core_32 | TTTTTCAATATTATTGAAAAACCCAGCACTGCCTTCGGCCCCAGTGGGCACCAA          |
| core_33 | AAGCATTGAGGAAGGCAAATGTTGGTAGC                                   |
| core_34 | TTATTGTCTCATGAGCTAAAGAACATCCGTAATCCCCACGCTCACCACCCCAT           |
| core_35 | GGATACAACCTTACCAGCGTTTCGCTGGTA                                  |
| core_36 | TGATTTTAGAAAAATGTTGTTTCTACTCAACCGGTTCCACCCAGCC                  |

|          |                                                                                                                                                                   |
|----------|-------------------------------------------------------------------------------------------------------------------------------------------------------------------|
| core_37  | AAACAAATTCGTGCACCCAACCTGACAGCAGA                                                                                                                                  |
| core_38  | CGCGCACATTTCCCCATCAAAAAGTGCGGCGGCTCGTCGTGGTCCT                                                                                                                    |
| core_39  | TCTTCAGCTGGTGAGAGTTTGGAAAGCCGGCGAACGTGGCGAGAA                                                                                                                     |
| core_40  | TCTTCGGGGCGAAAACCTGACGCTGGATCTTC                                                                                                                                  |
| core_41  | TCTTACTAGCAAAAATATCAGGGGACTATAAAGATACCAGGCGTTTCCCCCTGG                                                                                                            |
| core_42  | GTCATGCCGTGGACTAAGGGAGCCCCGATTAGAGCT                                                                                                                              |
| core_43  | ACCGAGTTAATTAATAATCCTTTGAGACACCCTCCGCCCTGAGCAAAGACCCCCAACTCTCG                                                                                                    |
| core_44  | GCTCTTGCATCTTACCCACCTAAAGGCCGCGTTGCTGGCGTTTTTCCATAGGCT                                                                                                            |
| core_45  | GATAACTCAAAAACAGTGAACAGACCC                                                                                                                                       |
| core_46  | TCCTCCGAAATAGGGACTTCCATTGACGTCTTGTCTTCTGCAATCGTGTCC                                                                                                               |
| core_47  | GGTTAGCTCATAATTCGCGATCTGTCTTGAT                                                                                                                                   |
| core_48  | AAAAAAGCGAACCCCTACCAACGTCAAAGGGCG                                                                                                                                 |
| core_49  | TGTTGTGCGAGTATTACGGTAAACTGCCAAAGTCTCCGGCTCCATGGACGG                                                                                                               |
| core_50  | TTACATGAGATGCTTCCAATGCTGCGGTGGGGGGCAC                                                                                                                             |
| core_51  | AAGGCGAGTGACGGGGAACAAGAGTCCACTAT                                                                                                                                  |
| core_52  | AACGATCTACATCAAGTGTATCATATGCCAGTGGATAGAGCCGGAATTCACCGG                                                                                                            |
| core_53  | TTCAGTCCAAGTCAGTATATATTTACGCGC                                                                                                                                    |
| core_54  | TGGCTTCAAGGAAGGGGAGATAGGGTTGAGT                                                                                                                                   |
| core_55  | TTTGGTACCCCTATTGACGTCAATGACGGTAGTGATGCGGCAACTTT                                                                                                                   |
| core_56  | CCATCCATGCTACAGCGCTGGCATTATGCCAGTACACATCTAGC                                                                                                                      |
| core_57  | CATAGTTGCACTCATAAGGGAATCTTCCAAGCTCCCTCGTGCGCTCTCCTG                                                                                                               |
| core_58  | TCTATTTAGCTGCCCGGCGAGGGCGAGGGCG                                                                                                                                   |
| core_59  | TAATCAGTCAACCTGACGACGTAACGGCCAC                                                                                                                                   |
| core_60  | GACAGTTATTCGTGACATCTTTTTATTTGAACGCTCAAGTCAGAGGTGGCGAAACCCGACAG                                                                                                    |
| core_61  | GAGTAAACCGCTACCGGTGGTGCCCATCCT                                                                                                                                    |
| core_62  | ATCTAAATTCGTAGATAACCCACAGGGTCCCGCCCCCTGACGAGCATCACAAAAATCGA                                                                                                       |
| core_63  | AAAAAGAGCCGCAAAAGGTTATGGGTCTATCAAGGTGCCGTAAGCACTAAATCG                                                                                                            |
| core_64  | AAGAAGAATGAAGTTTCTTCAATGGTGAGCAAGGGCG                                                                                                                             |
| core_65  | TCTTTTCTGCATGGACGAGCTGTACAAGTAATCACCAG                                                                                                                            |
| core_66  | ACGGGGTCTCAAGGCCGGCTCGAAATCGGTGGCAAGTGTAGCGG                                                                                                                      |
| polyT_1  | TTTTTGCAAAAGGCCAGCAAAAGGCCAGGAACCGTAAAAATTGTAAGCGTTAATAATAGGCC                                                                                                    |
| polyT_2  | TTTTTCTGTCCGCTTTCTCCCGCTTACAGGATTATGTTGAACGTGAAC                                                                                                                  |
| polyT_3  | TTTTTCGCTTCTCATAGCTCTTCGGG                                                                                                                                        |
| polyT_4  | GCGATCACATGGTCCTGCTTTTTTTTTTTGGAGTTCGTGAATGAGTGATTTTT                                                                                                             |
| polyT_5  | TTTTTCGACGGCAACTACGAAAACCTACGTTAAGGTTTTT                                                                                                                          |
| polyT_6  | TTTTTTTCGGTGTAGGTTGTCTACACTAGAAGAACATTTTT                                                                                                                         |
| polyT_7  | TTTTTCCAGTGTGCTGGCGGGAAGCTGAGATTA                                                                                                                                 |
| polyT_8  | TTTTTTGTGTGCACGAACCCCTAACAACCTCCGCCCATGATGCCACGGGCTTA                                                                                                             |
| polyT_9  | TTTTTCTACTTGGCAGTATGACCTTAAGTTTGC                                                                                                                                 |
| polyT_10 | TTTTTCTGCGCCTTATCCGGTATGTTCCCATACAAAATG                                                                                                                           |
| polyT_11 | TTTTTGCCGCGCTTAATGTCACAGATATACGTACGCTGGCAACGTT                                                                                                                    |
| polyT_12 | TTTTTGGTAAAGACAGCACTTACACCTAATCAGTAACTATCGTCTTGAGTCCAACCCTTTTT                                                                                                    |
| polyT_13 | TTTTTTGTAAATCACACCACCCCTTTTTT                                                                                                                                     |
| polyT_14 | TTTTTAAGTGCTCATCATTGGATAGCAGAACTTTAATTTTT                                                                                                                         |
| polyT_15 | TTTTTATGTAGGCGGTGCATTCGCCACTGGCAGCATTTTTTTTTTGGCACTGGTAACCGGATACTTTTT                                                                                             |
| polyT_16 | CTAGCCGCAAGTGTATCCTGACTCGCCAGTTAAAGAACGGCATCAGCTGTAGGTATCTCAGTTTTT                                                                                                |
| polyT_17 | AATACGGGTTGCCATGTCTATTATATTAGTCCCGAGCTCGGATCCACTAGTAACGGCCGTTTTT                                                                                                  |
| polyT_18 | CGCGCCACAAAACGTAAAATTCGCGTTAAATTTTTTTT                                                                                                                            |
| polyT_19 | TTTTTTTCGCCAGTTAATTGGGACTTTTTTTT                                                                                                                                  |
| polyT_20 | TTTTTGCCCTAACTACGGAGAAGTCTTGAAGTGGTGTTTTT                                                                                                                         |
| polyT_21 | TAACCTACGTGCGTTCAGCCCCGACCGTTTTT                                                                                                                                  |
| polyT_22 | ATACGGGACTACGGCAAGCTGTGCTCCAAGCTGGGCTTTTT                                                                                                                         |
| polyT_23 | ATTGTTGCAATTCTGCCGCACCATCTTCTTCAAGGATTTTT                                                                                                                         |
| polyT_24 | TTTTTGATTTTGGTCATAGAGTAAGTAGTTTTT                                                                                                                                 |
| polyT_25 | TTTTTGATTTTGGTAAAGCGTGGTTTTT                                                                                                                                      |
| polyT_26 | TCTGCGCTAGCAGAGCGAGTTTTTTT                                                                                                                                        |
| LPv2_1   | TCCTTTCTAATAAAATGAGGAAATTGCATCGCATTGTCTGAGTAGGTGTATTCTATTCTGGGGGGTGGG<br>GTGGGGCAGGACAGCAAGGGGGAGGATTGGGAAGACAATAGCAGGCATGCTGGGGATGCGGTGGGCTC<br>TATGGCTTCTGAGGC  |
| LPv2_2   | CGTTGACATTGATTATTGACTAGTTATTAATAGTAATCAATTACGGGGTCAATTAGTTCATAGCCCATATATGG<br>AGTTCCGCGTTACATAAATTACGGTAAATGGCCCGCTGGCTGACCGCCCAACGACCCCCGCCATTGAC<br>GTCAATAATGA |



### 2.2.2.3 sc\_EGFP2 20HB-Circ

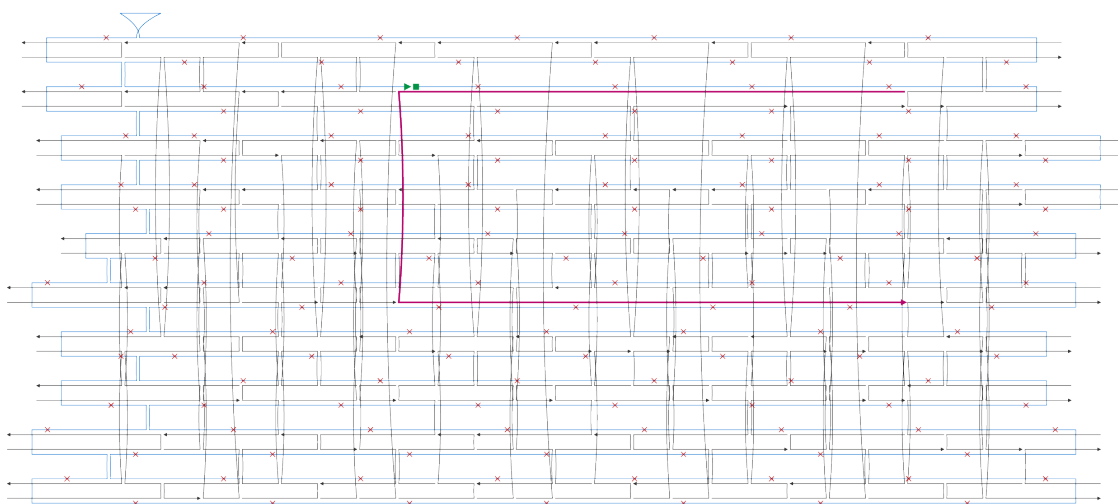

**Fig. S 30 | Scaffold routing and staple design for sc\_EGFP2 20HB-Circ.** Scaffold routing is shown in blue, staples are given in black, breakpoint for addition of sequence is marked by a green square (5') and arrow (3'). Long 200-mer 'primer' sequence linking the reverse complement sequences for the polyA (5') to the promoter (3') region, flanking the EGFP gene is given in pink. Design was prepared using caDNAo v0.1.

**Table S17 | Individual staple sequences for sc\_EGFP2 20HB-Circ.**

| Name    | Sequence 5' - 3'                                                 |
|---------|------------------------------------------------------------------|
| core_1  | CAGAGGTGTGGCGAGAAAGGAATTATAAAT                                   |
| core_2  | GATACCAATTTAGAGCTTGACGGTTGAGTG                                   |
| core_3  | ACCTGTCTCTGAGTAGGTGTCATCCTTTCC                                   |
| core_4  | CGAATGAGAAATCGACGCTCAAGTTTATCCGG                                 |
| core_5  | ACTTGTACAAGTAATCTAGAGGGCCCTATTCCAAAAGGC                          |
| core_6  | TATAGTGTGACCGCCGCCGGGATGCGACACC                                  |
| core_7  | CACCTAAATGCTAGAGCTCGCTGATCAGCCTAGCGCATCACATGGGGGCATCG            |
| core_8  | CGACTGTGCCTTCTAGTTGCCAGCCATCTGTCTCAGTCCGCCCTGAGCCTGGGGCACCCTTGG  |
| core_9  | GCTGCTGCCCGACAAGCCACAACGTC AATGGTTTCCAAG                         |
| core_10 | AGCAGAACACCCCCAGAAGAACGTCAGTAACGGAGTTTGTGAAGCAAAAAAAG            |
| core_11 | TATCGCCGAGGTGAAGTTCGAGGCACTCTCG                                  |
| core_12 | AGTACAACCTACAAACACCACTACCTGAGCACCTGTTTGCCCCCTCCCCCGTGCCTTCCTTGAC |
| core_13 | AGCGCACCCGCATCGAGCTGAATCCTGCTGCAGATATA                           |
| core_14 | AAGTCCGCGAGGACGGCAACATCAAAGACCCCAACGAGA                          |
| core_15 | TGACCTACTCATGGCCGACAAGCATCGGCGACGGCCCCGTCCTGGAAGGTGCCACTCCCCTGT  |
| core_16 | CAGATATCAGCTCGGATCCACTAAACTCT                                    |
| core_17 | CATCACACTGGCGGCCGCTCGAGCGTCCAGGGCTATTACGCCCCCTAAAAATCCCGGGAAGAA  |
| core_18 | ATGGTGAGCTCACTATAGGGAGACTCCAGTTC                                 |
| core_19 | CAAGGGCGAGGAGCTGTTACCGACTTCTTACATCAATCAGTACATAGATAGGGGAAAGC      |
| core_20 | GGGTGGTGACTGCTTACTGGCTTAACTGATCT                                 |
| core_21 | CGACGTAAAAGCAGAGCTCTCTGGCGTTTCTG                                 |
| core_22 | GGCGAGGGCGGTAGGCGTGTACGAATGCCGC                                  |
| core_23 | TCTATATACGGCCACAAGTTCAGCGTGTCCGACCACCCGTC AATGGCCAATAGAACGTCA    |
| core_24 | TACTTGGCCCCGCTCTCATTTCGCTGGCATAAATTAACACGACTTATCGCCACTGGCTGG     |
| core_25 | GGGCGTGATAAACAATCAGCATCCGACCGAGTTGCTCTTGCCCCGC                   |
| core_26 | ACGGGGAGTGGAGTACAAGAGTCTAAAGGG                                   |
| core_27 | TTTTGGCACAATGGGCGAGGGCGATGCCACCTACGGCA                           |
| core_28 | CCAAAATCCCGTGCCGGTGAACCTTCAAGATC                                 |
| core_29 | GTAATGGAGTACATCATATTTCAAGGATCAAAGTGCTCATCATTGGAAAAC              |
| core_30 | CAATGACGCTGGTGAACATCTTCTCAAGGAC                                  |
| core_31 | CCAAGTACCATGGTGCCGAAAAGGATGTAACGGGATAATACCGGCCACATAGCTTGGTATG    |
| core_32 | TTTACGGTAAACTGCCAAGCTGGACATGAAGCAGCACG                           |
| core_33 | GGACTTTCATTGACGTCTATAGGCGTGCAGTGCTTC                             |
| core_34 | TGTTCCAGCATCAACTGCCCCACCCTCGT                                    |
| core_35 | GTAACCACCAGGAACATAGGCTCCGCCCCCCCGGTAAG                           |
| core_36 | CACACCCGGCTAGGGTTAACCAATAAGTAGTTGTCACGCTCGTCGTAGAACTTT           |

|          |                                                                                                                                                                                                              |
|----------|--------------------------------------------------------------------------------------------------------------------------------------------------------------------------------------------------------------|
| core_37  | AGTGTAGCTTTTTCCCGTAAAAAGGCCGCGT                                                                                                                                                                              |
| core_38  | CGGAACCCCACTATTTAAACCAGGTTAGCTCCTTCGGTC                                                                                                                                                                      |
| core_39  | CGAGGTGCTTGCCTGACTGTAGGTATCTCAGTTCGGTTCGTGCGCCACTAAAT                                                                                                                                                        |
| core_40  | TTTGGGGTAAGGGCGACCACGCTCGAAGTAAGTTGGCCG                                                                                                                                                                      |
| core_41  | GTTAAAATCATCGTGGTCGCCAGTTAATAGTGATCCTTT                                                                                                                                                                      |
| core_42  | TAAATTGTAATCGGCTTGACGTTAATGTCAGAGTTTCG                                                                                                                                                                       |
| core_43  | TGCCACCGCTTCATTTAATTGTTGCCGGA                                                                                                                                                                                |
| core_44  | ATAGGGGGGCGAGTCTGCAACTTTATCCG                                                                                                                                                                                |
| core_45  | TTAGAAAAGATAGCGGAGAACCCCATCCTGGTCGAGCTGGACGGAGCCGCTA                                                                                                                                                         |
| core_46  | CATATTTGAAAAGCGCCAGCCGGAAGGGCC                                                                                                                                                                               |
| core_47  | AGCGGATAGGTGAGCAAACCAAGTCATTCTGAGAATAGTTTGTGCAAATGTATGTTGGAA                                                                                                                                                 |
| core_48  | TTTATCAGCGTTGTCAACCGGCTCCAGATTTA                                                                                                                                                                             |
| core_49  | TTACCGCTGTTGAGACCAAGCTTAGTCATC                                                                                                                                                                               |
| core_50  | CCACTCGTGCACCCATCGAAATTTGGCAGT                                                                                                                                                                               |
| core_51  | TTTTACTTTTACCAGCTAACTAGTTTGACTCCCCCGACC                                                                                                                                                                      |
| core_52  | AGTACTCAAACAGGAAGGCAAGTGGGAGGCCATTGAC                                                                                                                                                                        |
| core_53  | TAAGATGCTTTTCTGTGACTGGTGCTCCGATGGTTATTTGGACTCC                                                                                                                                                               |
| core_54  | CCATCCGGGAATAAGGGCGACACCATTTGACG                                                                                                                                                                             |
| core_55  | ACGATCAATTCGCGCATAGACCGCAAGTGTATCATATGACTTCAAGCATGCCCGAAGGCTA                                                                                                                                                |
| core_56  | CAGTCTATCAGCTCCGGTTCCAGTCAATAC                                                                                                                                                                               |
| core_57  | AAGTGGTCTACATGATCCCCCATGGTATGCGG                                                                                                                                                                             |
| core_58  | GTGCTGCAATGATACCTAACTACACCCTAA                                                                                                                                                                               |
| core_59  | AAATGAAGTTTTAAAAGCTAGAGTAGGCCGAAGCGTTATACGTATTGGTACCG                                                                                                                                                        |
| core_60  | TCAATCTAAGCGAAAGATCACAATGAGCAAAAAGGCCAG                                                                                                                                                                      |
| core_61  | AAGTATATTAACATATCGTCTTGAGTCCAACCTGACGAGCGAGCGGGCCCCGCGCT                                                                                                                                                     |
| core_62  | ATGAGTAAACTTGGTCTCCATCCAAAAGAACATTTCCATGCGGTTTAAATACGA                                                                                                                                                       |
| core_63  | CTGACAGTCGGCGAACGGCGAAACCCGACAGGACTATAAACGAACCCC                                                                                                                                                             |
| core_64  | TACCAATCCGTTCCAGCCGACCGCTGCGCC                                                                                                                                                                               |
| core_65  | GCTTAATCAGTGAGGCGAGCGCAGTTGTTCCA                                                                                                                                                                             |
| core_66  | ACCTACTAGCCCCCGGGCGTTTTCCCTGGAAGCTCCCAGGTGCGTT                                                                                                                                                               |
| core_67  | CAGCGATCGCTCCAAGCTGGGCTGTGTGCA                                                                                                                                                                               |
| core_68  | CTGTCTATTTGTTTCATCAGCAAAAAGAACGGTCTCATGTCTCCACC                                                                                                                                                              |
| core_69  | TCCATAGCGTAAAGTCTCCTGTTCCGACCCTGCCGCTAGCTCACG                                                                                                                                                                |
| core_70  | CTCCCCGTCGTGTAGAGCGGAGACAAAACCGTAATATTA                                                                                                                                                                      |
| polyT_1  | TTTTTCTTCGGGAAGCGTGGCGCTTTTCTCATTACCGGATTCAAGTTTAAATGGCC                                                                                                                                                     |
| polyT_2  | TTTTTAGCGAGGTATGTAGGCTAACAGGATTAGCAGTTTTT                                                                                                                                                                    |
| polyT_3  | TGCTGGCGGGTTTTGTTTGAAGCAGCAGTTTTT                                                                                                                                                                            |
| polyT_4  | TTTTTCATCGCATTGGCCTTTCTCCTTTTT                                                                                                                                                                               |
| polyT_5  | TTTTTTGAAGTGGTGGCCTAGGTGCTACAGAGTTCTTTTT                                                                                                                                                                     |
| polyT_6  | TCGCCGATGACCGCCCAACGACCCCTTTTT                                                                                                                                                                               |
| polyT_7  | TTTTTGACGGCAGCGTGCAGCCGCCACAACATCGAGTTTTT                                                                                                                                                                    |
| polyT_8  | TTTTTGAACAGTATTTGGCATGATCCGGCAAACAAATTTTT                                                                                                                                                                    |
| polyT_9  | CAAGCTGCAACGGGACGTCAATAGCGATGGCCCACTTTTT                                                                                                                                                                     |
| polyT_10 | TTTTTTCATCTGCACCACCGGAGCTGACCCTGAAGTTTTTT                                                                                                                                                                    |
| polyT_11 | TTTTTGCCAGTTACCTTCGGAACAGTGTGCTGGAATTCTGGACGGCAA                                                                                                                                                             |
| polyT_12 | TTTTTGTGTAACAACCTCCGCCCGAAATGTTGAATTTTT                                                                                                                                                                      |
| polyT_13 | TTTTTCTCTTGACGGATCTCAAGAAGTTTTT                                                                                                                                                                              |
| polyT_14 | GACTTTCCCTACAAGACCCGCTGCGCTGTGCTGAATTTTT                                                                                                                                                                     |
| polyT_15 | ATGACGTACGCTGGCCCACTACCTAATAAAATGAGGAAATGTTTTT                                                                                                                                                               |
| polyT_16 | TTTTTCGCCCAATTGACTTTCCAAAATTTTTT                                                                                                                                                                             |
| polyT_17 | TTTTTCCACCGCTGGTAGCGGTGGTTTTTCACGCCAGTA                                                                                                                                                                      |
| polyT_18 | GCTGCGCGCATGGACGAGCACGGCTACACTAGAATTTTT                                                                                                                                                                      |
| polyT_19 | TTTTTACGTGAACCATCGATACGGGAGGGCTTACCATTTTT                                                                                                                                                                    |
| polyT_20 | TTTTTATTACGCGCAGACGTGGGATTTTGGTCATGTTTT                                                                                                                                                                      |
| polyT_21 | TTTTTACTCATACTCTTTCACTCAT                                                                                                                                                                                    |
| polyT_22 | TTTTTATCCTTTGATCTTTTCTCTTCGGGGCGAGTAACGGC                                                                                                                                                                    |
| polyT_23 | TTTTTCACTGCATAATTCTTACTGTATGAGTGTACCTTTTTCTATCAGG                                                                                                                                                            |
| polyT_24 | TTTTTCGAAAACCTCACGTTAATGTTGCCATTGTTACGGGGTCTGACGCTCAGTGGAATTTTT                                                                                                                                              |
| polyT_25 | GCTACAGGTGCGGTTAAATTTAACTTATGGCGCAAAGAGTTGGTAGTTTTT                                                                                                                                                          |
| polyT_26 | TTTTTCTGGCCCCAGGTTATGGCAGTTTTT                                                                                                                                                                               |
| polyT_27 | TTTTTAGATTATCAAAAAGGATCTTCCACTATTGCGCAAAAATTGTTAAATCAGGGCATTAT                                                                                                                                               |
| Circ_1   | TCTATTCTGGGGGTGGGGTGGGGCAGGACAGCAAGGGGGAGGATTGGGAAGACAATAGCAGGCATGCT<br>GGGGATGCGGTGGGCTCTATGGCTTCTGAGGCGGTTGACATTGATTATTGACTAGTTATTAATAGTAATC<br>AATTACGGGGTCATTAGTTCATAGCCATATATGGAGTTCGCGTTACATAACTTACGGT |

2.2.3 sc\_EGFP3

**Scaffold sequence for sc\_EGFP3:**

taggctgctgcgctcgtcactgagccgcccgggcaaagcccgggctgccccgaccttggctgccccgacctcagtgagcgagcg  
agcgcgagagagggagtgccaactccatcactaggggttcctgtagtaaatgattaaccgcatgctactatctacgtagccatgctcta  
ggaagatcggaattcgccctaagctagctagttattaatagtaataacacggggcattagttcatagccatataatggagttccggttacat  
aactacggtaaatggcccgcctggctgaccgccaacgacccccgccattgacgtcaataatgacgtatgttcccatagtaacgccaatg  
ggactttccattgacgtcaatgggtggagtagttacggtaaaactgcccacttggcagtagacatcaagtgatcataatgccaagtacgccccctattg  
acgtcaatgacggtaaatggcccgcctggcattatgcccagtagacacattatgggactttcctacttggcagtagacatctacgtattagtcacgc  
tattaccatggtagcggtttggcagtagacatcaatggcggtgtagcgggttactacgccccgatttccaagctccacccccattgacgtcaat  
gggagttgtttggcaccaaaatcaacgggactttccaaaatgctgtaacaactccgccccattgacgcaaatggcggtaggcggtgtagcgt  
gggaggtctataaagcagagctggttagtgaaccgtcagatcctgcagaagttggctgtaggacactggcaggttaagtacaaggttaca  
agacaggttaaggagaccaatagaaactgggctgtcagagacagagaagactctgctttctgataggcacctattggtctactgacatcca  
ctttgctttctccacaggtgtccaggcggccgcatggtgagcaagggcgaggagctgttaccgggggtggtgccatcctggtcgagctg  
gacggcgacgtaaacggccacaagtacagctgtccggcgaggcgaggcgatgccacctacggcaagctgacccctgaagttcatctgc  
accaccggcaagctgcccgtgcccggccaccctgtagccaccctgacacggcgtagctgttccagccgtacccccgaccacatga  
agcagcagcacttctcaagtccgcatgcccgaaggctacgtccaggagcgcaccatcttctcaaggacgacggcaactacaagaccgg  
cgccgaggtgaagttcagggcgacaccctggtgaaccgcacgagctgaagggcatcgactcaaggaggacggcaacatcctggggc  
acaagctggagtacaactacaacgcccacaactgctataatgcccgacaagcagaagaacggcatcaaggtgaactcaagatccggc  
acaacatcaggacggcagcgtgcagctgcccgaccactaccagcagaacacccccatcgccgacggccccgtgctgctgcccgacaa  
ccactacgtgaccccagtcgcccgtgagcaaaagaccccacgagaagcgcgacacatggtcctgctggagttcgtgacggccgcccgg  
gatacctcggcatggacgagctgtacaagtaataagctggatccaatcaacctctggattacaaaatttgtaagagattgactggtattctta  
actatgttctctttacgctatgtggatacgtgctttaatgctttgatacgtatgttctcccgtatggctttctctcctctgtataaactctg  
gttctgtctctttatgaggagttgtggccgtgtcaggcaacgtggcggtgtgtagctgtgttctgtagcgaacccccactggtggggcattg  
ccaccactgtcagctcttccgggacttctgctttccccctccctattgccacggcggaactcatcgccgctgcttcccgtgctggacag  
gggctcggctgttgggactgacaattcgggtgtgtcggggaaatcatgctccttctggtgctgctgctgctgttggccactggattctgcg  
gggagctcctctgctacgtccttccgcccataccagggaccttctcccggcgctgctgcccgtctgcccctctccgctcttcgag  
atctgctcagctgtgcttctagttgccagccatctgttttggcccctccccgcttcttaccctggaaggtgccactcccactgtccttct  
aataaaatgaggaaattgcatcgcattgtctgagtaggtgtcattctattctgggggtgggggtggggcaggacagcaagggggaggattggg  
aagacaatagcaggtatgctgggactcagtaagggcgaattcccgataaggatcttctagagcatggtacgtagataagtagcatgg  
cgggttaatacattaactacaaggaaccctagtgatggagttggccactcctctctgctgctgctgctcactgaggccggcgaccaaa  
ggtcggccgacggcggttggccggcgccctcagtagcagcagcagcgcagccttaATTAAcattaagcggcggggtgtggt  
ggttacggcagcgtgaccgctacacttccagcgccctagcggccgctccttctgcttctcccctcttctgcccaggttcggcgcttcccc  
gtcaagctctaaatcggggctcctttaggttccgatttagtcttaccgcaacctcgacccccaaaaactgattagggtaggttaccgta  
gtgggccatgcccctgatagacgggttttgcctttgacgttggagttccaggttcttaaatagtgactctgttccaaactggaacaactcaac  
cctatctggtctattcttgaattataaggattttgcgatttcggcctattggttaaaaaatgagctgatttaacaaaatataacggaatttaac  
aaaataataacgcttacaatttaggtggcacttttggggaaatgtgcgccaacccctattgttttttaataacattcaaatatgtatccgctc  
atgagacaataaccctgataaatgctcaataatgaaaaaggaagagtagattcaacatttccgtgctgcccctattccccttttggcgc  
attttgccttctgttttctcaccagaaacgctggtgaaagtaaaagatgctgaagatcagttgggtgacagagtggttacatcgaactgga  
tctcaacagcggtaagatctgagagtttgcggcgaagaacgtttccaatgatgacactttaaagttctgctatgtggcgcggtattatccc  
gtattgacggcggaagagcaactcggctcggcgcatacactattcagaatgacttggtagtactaccagtcacagaaaagcatcttac  
ggatggcatgacagtaagagaattatgcagtgtccataaccatgagtagataaacactgcccgaactacttctgacaacgatcggaggac  
cgaaggagctaaccgctttttgacaacatgggggatcatgtaactgccttgcgttgggaaccggagctgaatgaagccataccaaacg  
acgagcgtgacaccacgatgctgtagcaatggcaacaacgttgcgcaactattaactggcgaactactactactgcttcccggcaacaat  
taatagactggatggaggcgataaagttgcaggaccacttctgctgctgcccctccggctgggttattgctgataaactggagccggg  
gagcgtgggtcagcgggtatcattgcagcactggggccagatggttaagccctcccgtatcgtatctacacgacggggagtcaggcaact  
atggatgaacgaaatagacagatcgtgagataggtgctcactgattaagcattggttaactgtcagaccaagttactcatataacttttagatt  
gatttaaaacttatttaatttaaaggatctaggtgaagatccttttgataatctcatgacaaaatcccctaacgtgagtttcttccactgagc  
gtcagacccccgtagaaaagatcaaaggatcttctgagatcctttttctgctgctgctgcaaaacaaaaaacaccgctaccag  
cgggtgttttggcgatcaagagctaccaactcttttccgaaggttaactggctcagcagagcgcagataccaaatactgtccttctagtga  
gccgtagttaggccaccactcaagaactctgtagcaccgctacatacctcgtctgctaatcctgttaccagtggtgctgcccagtgggcga  
agtcgtgcttaccgggttgactcaagacgatagttaccggataaggcgcagcggctcgggctgaacggggggtctgtcacacagcccag  
ctggagcgaacgacctacaccgaactgagatacctacagcgtgagctatgagaaagcgcacgctcccgaagggagaaaggcgga  
ggatccggtaagcggcagggctggaacaggagagcgcacagggagctccaggggaaacgctggtatcttatagtctgctggtt  
cgccactctgactgagcgtgattttgtgatgctgctcagggggcgagcctatgaaaaacgccaagcagcggccttttacggttct  
ggccttttctgcttcttctcacCTTAat

## Corresponding DNA origami designs and staple lists:

### 2.2.3.1 sc\_EGFP3 20HB

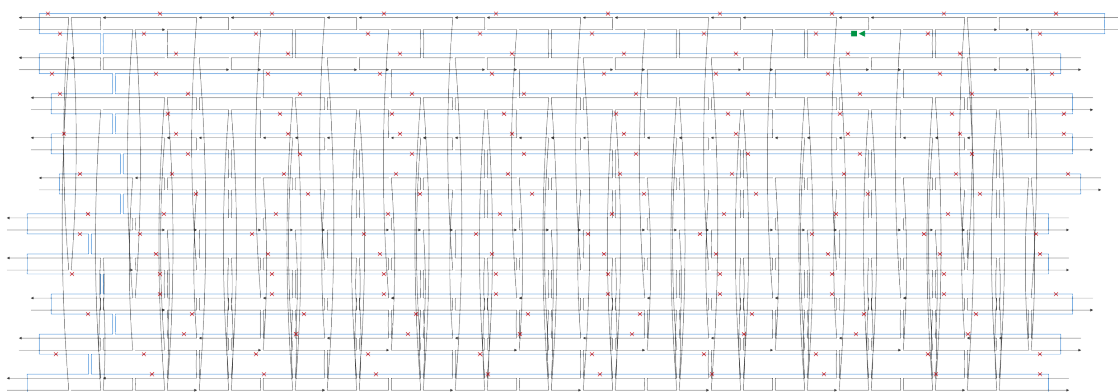

**Fig. S31 | Scaffold routing and staple design for sc\_EGFP3 20HB.** Scaffold routing is shown in blue, staples are given in black, breakpoint for addition of sequence is marked by a green square (5') and arrow (3'). Design was prepared using caDNAo v0.1.

**Table S18 | Individual staple sequences for sc\_EGFP3 20HB.**

| Name    | Sequence 5' - 3'                                         |
|---------|----------------------------------------------------------|
| core_1  | TAGATAAGTCAGGGCGAAAAAGGTAGAGTAA                          |
| core_2  | CTACAAGACTCCAACCTTTCTACGCCATCCAGCTTGTGGCAGATGAACTTCAGGGT |
| core_3  | GAACCCCTTAGCTAGCTTAAGGGGATGTACT                          |
| core_4  | ACTCCCTGGAACAAAACTCAGCAGAAGACCAGGATGGCCAGGGCACGGGCA      |
| core_5  | CTCTGCGCAATGACCCCGTAATTATAGCGA                           |
| core_6  | GAGGCCGGACCGAGATTATCAAGCAATAACCTCGCCACGCCGTAGGTCAGG      |
| core_7  | GCGACCAAAACGCGGAACTCCATAAGTAGG                           |
| core_8  | CGGGCTTTCGGCAAAATTAATTATGACCCACGACACCTCATGTGGTCGGGGTA    |
| core_9  | GCCCGGGCAGCCAGGCGGGCCATGGGCATAA                          |
| core_10 | GCGAGCGCTCAGCTCAAAGTATACATCTGGCGTCAGTAAGCATGGCGGACTTGA   |
| core_11 | GCAGCCTAGACGTCAATGGGCGGGATTGACGT                         |
| core_12 | AAGGCCAGTTGTTAAATTACCAATGTGTAGATCGCAAGAGAAGATGGTGCGCTCC  |
| core_13 | CAAAGGTGGCGTTACTATGGGATGATACAC                           |
| core_14 | CTAGAGCATGGCTACGAGTGTGAGTCAAACCGCTATCCACGCCATT           |
| core_15 | GATCTTCGCGGGTTAATCATTAAATTCGGTGT                         |
| core_16 | CGAATTCCTTTGATCTGTCAAAGGCAGCATCTTATCGGGACCCCTTGCTGTCCT   |
| core_17 | TTAATAACAGTGATGGAGTTGGCCTTTCTCAT                         |
| core_18 | GATTACTATGGAACGAGAGTCCACGTGAGCAATATCTACGCAGAATAGAATGACA  |
| core_19 | TATGAAGTCTCGCTCGCTCACTTCCGCCT                            |
| core_20 | ATATGGGCTCATGAGATAGGGTTGAAAAAGGGTTGTAGTTGATGCAATTCCTCA   |
| core_21 | AGTTATGTAGGTCGCCGACGCCGTTCCGA                            |
| core_22 | TTACCGTAGATCCTTTCCCTTAGAATACTCGGAGTGGCAGTGGGAGTGGCAC     |
| core_23 | GGGCGTCCGCCCTAGTGAGCGATCCCCCT                            |
| core_24 | GGTCGTTTCAATCTTTTTTATTGAAGCAGGCCTCAAAGGCACGGGGGAGGG      |
| core_25 | TCATTATTATTAAGGGTGAGCAAACCCGACA                          |
| core_26 | ACATACGTCTGACAGATTCGCGTAGCGGATAGCCCGGGCTGGCAACTAGAAGGC   |
| core_27 | TCCCTATCCAGGAACCGTAAAAA                                  |
| core_28 | CATTGACGTCATGGGACGCTGAATCTATTAAGTTGTTGCTGTTGAGA          |
| core_29 | TCCGTTGATTTTGGTCCAGCTCGTGGTCCTGCACGCTCGTCGGGGCG          |
| core_30 | TGGGGCGGAGTTGTTAGAACAGCTACCAGCCACTCCGGTTTTAAAAG          |
| core_31 | CCGTACAGCCTACCGCCGCTGGCTCACCTGATCCCTACGGGAT              |
| core_32 | CTAAACCAGCTCTGCAGTGGATCCAGTGAGCTCCTTCGGCGACC             |
| core_33 | ACGACCAACTTCTGCTCAGAAAACTACGAGTAAGTTGTCAACCA             |
| core_34 | GTAACCTTGATACTTCAAGCCCACCATAGTTTATGGCAGCGTAAGA           |
| core_35 | ACTCGCCTCGCCCTCGCCGGACGTGGAGAGAAGATCC                    |
| core_36 | CGTTACGTCCCGTGCCAAAAACGCTCAG                             |
| core_37 | GGGCACCACCCCGGTGACATTTGATTTTGG                           |
| core_38 | CTTGCTCACCATGGCGGCCATTTTTACCTA                           |
| core_39 | GTGGAGAGAAAGGCAATTATATAGGTTTTAAA                         |

|          |                                                                  |
|----------|------------------------------------------------------------------|
| core_40  | GACCAATAGGTGCCTAAGGATCTGAACCTGG                                  |
| core_41  | TCTTCTGTCTCGAACCTGCCAGTGAGG                                      |
| core_42  | CTGGTAGTTTGTCTGGGCAGCAGCAAGCGAATCCAGTTCCAATCCT                   |
| core_43  | TCTCTGATGCTCAGGGCGGACTGGGGTGGCAAAAACCTCCACCCCC                   |
| core_44  | CCTTGATGCCATGTGATCGCGCTTGTGACGAATGCTCATCGACAATGC                 |
| core_45  | GATATAGAATCCCGGCGGGTGCATGCCTGACAATACCGCGGAAAGGA                  |
| core_46  | TCCAGCTTTACTTGTACAGCTCGGAGACAGCGAGTTGCTGTCAAGG                   |
| core_47  | CCTTGAATAATCCAGAGGTTGAGAAAAAAGATCATTCCAGATGG                     |
| core_48  | GTTACCAAGAATACCAGTCAATGATAACAATGCTTTTCAGGCAGAT                   |
| core_49  | GGTAGTGGGGTCCGGCAGCTGCACGCTGCCGGCTTGGCG                          |
| core_50  | GGGTCTTTGTTGTGGCGGATCTTGAAGTTCAAGTGGTCAC                         |
| core_51  | AGCAGGACCGTTCTTCTGCTTGTGCGCCATGCGGCTGA                           |
| core_52  | GAGAGTGCCTTGTGGCTGTTGTAGTTGTACAGAAGTCG                           |
| core_53  | AAGCTTATGTGCCCCAGGATGTTGCCGCTCTTGGACGTA                          |
| core_54  | AAATTTTGGTCGATGCCCTTCAGCTCGATGCGCCGTCGT                          |
| core_55  | AGTCCCGGGCGGCGATGAGTTCGCCCGTGGCTGTCTTC                           |
| core_56  | ATGCCCCACCGAGCCCTGTCCAGCAGCGGGGCCCCACC                           |
| core_57  | ACACAGTGACAACACCACGGAATTGTCAGTGCCCTACTCA                         |
| core_58  | AACGGGCCGACGCAAGGAAAGGACGATGATTTTTATTA                           |
| core_59  | AACCAGGACCGCGCAGAATCCAGGTGGCAACCTTCCAGG                          |
| core_60  | AAGCCATGAGGGCCGAAGGGACGTAGCAGAGCAAACAA                           |
| core_61  | AGGCATTGCAGGCCGCGGGAAGGAAGGTCCACAGTCG                            |
| core_62  | CAAGCGAAAAGGAGCTGACAGGTGTGCTCAACAGGCATGTGGTGC                    |
| core_63  | CCAACAGACCAGTGGGGTTGCCTCGTTGGTATGGCTGAGGGTG                      |
| core_64  | TTCCCCGCACACCACGCCACGTCGAACTCCATCAAGGCAGCACTGC                   |
| core_65  | ACAGCGAACAACCTCCTATAAATCCATGCCTGCAAAAATGCTGCTT                   |
| core_66  | AGGACGCTTTTATAAAGGAGGATTGGATCCCGATCGTTGCCTTCGG                   |
| core_67  | GCTGGATTACGGGAAGCAATAGCATCTTTCACGTTATCACCTTGAAG                  |
| core_68  | GAGTCCCGATTCTGCACCCAAC                                           |
| core_69  | ATTCGCCCTTAACTCCTACGTGCCGTCTATAGCATG                             |
| core_70  | TAGCCATGCTCTAGGTGGGGTCAACGTGG                                    |
| core_71  | AATGATTAACCCGCCAGGAACCTTCCAGTTT                                  |
| core_72  | CCAACTCCATCACTAGTTGACGGGAAGAATAG                                 |
| core_73  | GTGAGCGAGCGAGCGCAAGGAAGGGCCGAAAT                                 |
| core_74  | CGTCGGGCGACCTTCTAGGGCGTTGTTAAA                                   |
| core_75  | GCTCACTGAGGCCGCGCGTAATTAATATT                                    |
| core_76  | CCCTAATCAAGTTTTTAAGATCCTTTTACTTTTCTTACCGCCATTGCT                 |
| core_77  | GTAAAGCACTAAATCTGCTACTAAACAGGAAACGTTCTTCGTTTG                    |
| core_78  | CCCCGATTTAGAGCGGGTTCCAATAAGGGAGCAGAACTCCAACG                     |
| core_79  | GCGAACGTGGCGAGAGCAGAGAGATACTCTGCGTCAACCATGTTG                    |
| core_80  | CGAAAAGGAGCGGGCGGGTCCGCCCTTATCAGTGTATGCGGTCCCTC                  |
| core_81  | GTGTAGCGGTCACGCTCCGGGCAACATATTTGTGAGTACGCCGAGT                   |
| core_82  | TCAAGGATCACCAGCGTCCGCCTGGGTCTGCAAACTCCGCCAAAACCGCATCACCATGGTA    |
| core_83  | ATTGGAAGGCAAAGGCCGAGCCGTTAAGGTGGAAAGTGACTAATACGTAGATGACTGCC      |
| core_84  | GCCACATCGACACGATTTATCAAAGGATCGCGTCAAAAAGTCCCATAAGGTCATGTACT      |
| core_85  | CTTGCCCGTCTTTTTATACCGCGAAAATGAAACCTCCCATGCCAGGCGGGCCATTTACCGTC   |
| core_86  | TGAGAATAGGGTTATTGGCTTACTATGAGTAACGGTTCACAATAGGGGGCGTACTTGGCATA   |
| core_87  | TGTGACTGGAATGTATTCCCCGCTGCTTAATCAGTGCCTTGTGATGACTGCCAAGTGGGCAG   |
| core_88  | TGCGCAACTTGTTCCTGATCTTGCAGAAAAAACCATCAAGGTCGTTTCGCTCCAAGCTGGGC   |
| core_89  | CGTGGTGTCAACTTTATTTCTGGTATTAAGGAGGTGCCAGCTCACGCTGTAGGTATCTCAG    |
| core_90  | TCATTCAGGCCGGAAGATGCCGCAAGTGTGTAAGGGAGTCTCCCTTCGGGAAGCGTGGCGC    |
| core_91  | GAGTTACAGGCTCCAGGAAATGTTTAAATCAAGAAAGCCGCCCTGCCGCTTACCGGATACCTG  |
| core_92  | AGCGGTTCTGCAATGCAATTAACCAATAGGAAGAAAGGGAAGCTCCCTCGTGCCTCTCCT     |
| core_93  | GTCAGAATACGGGAGTCTCATGTAATTTCTGGCAAGGACTATAAAGATACCAGGCGTT       |
| core_94  | CTCATGGTGCCTGACTTAGAAAAGTAAGCGCCACCACGCTCAAGTCAGAGGTGGCGAA       |
| polyT_1  | AAAAATCGACCCGCCGCGCTTAATGTTAATTTTT                               |
| polyT_2  | TTTTTGGCTCCGCCCCCTGACGAGCATCACGGCCGCGT                           |
| polyT_3  | TTTTTCCCGTTACGCCGACTGTGTGCAAGTTACCATGGCCCA                       |
| polyT_4  | ATGGAAAGCACCTATCCCTAAATTAATAACAGCTCGCTCCTCGAAGACGCGGAAGAGGCTTTTT |
| polyT_5  | TTTTTCCACCCATTGACGTCATTTACCGT                                    |
| polyT_6  | TTTTTGTAACTATCGTCTTGCCTGCGC                                      |
| polyT_7  | TTTTTAAACCTGTCTTAAATACTTTTTT                                     |
| polyT_8  | TTTTTACGACTTATCGCCGATTTTTTTGTTTGAAGTTTTT                         |
| polyT_9  | TTTTTTCACCTCGGCTGGTCTCCTTTTTT                                    |
| polyT_10 | TTTTTTAACAGGATTAGCAGAGCGCCGATGGGGGTGTTCTGCAGCTTG                 |
| polyT_11 | TTTTTGTAAAAGGAGCAAATTTCTTTTTT                                    |
| polyT_12 | TTTTTGTACAGAGTTCTTGAGGGAGGGGAACGGGGCC                            |
| polyT_13 | TTTTTTCGAGAGCCGGCAAAAGCAGCGTATCCACATAGCTTTTTT                    |
| polyT_14 | TTTTTCACTAGAAGGACAGTATGCCTGCTATAATAAGTGGTGGCCTAACTACGGCTATTTTTT  |

|          |                                                 |
|----------|-------------------------------------------------|
| polyT_15 | TTTTTTTAAGGCTGCGCAATAGGGGATGCCATC               |
| polyT_16 | TTTTTCTGCTGAAGCCCGAACCCTTTTT                    |
| polyT_17 | AAGTGCCATCAGCGATCTGTCTTTTT                      |
| polyT_18 | TTTTTTTTCCCCGAATGCTGGCGTTTTTCCATTTTT            |
| polyT_19 | TTTTTTTGGTAGCTCTTAGCATTGGTATCTGCGCTTTTTT        |
| polyT_20 | CGATGTAACCCACCCGCGCCAGTTGTCGAGGTATGTAGGCGGTTTTT |
| polyT_21 | TTTTTTTACTGTCTTCCGCGCACATTTTT                   |
| polyT_22 | TTTTTTGGTAGCGGTGGGTTGCAAACAAACCACCGCTTTTT       |
| polyT_23 | AATAGTTCCGTAGGTGGCATGGCAGCAGCCACTGGTTTTT        |
| polyT_24 | CACTGCATACATAGTTAGGGTGTGCGCCCTCGAACTTTTT        |
| polyT_25 | GGGAAGCATCTCAACTTGAAATCCCCCAACCCGGTAAGACTTTTT   |
| polyT_26 | TTTTTTATTTGTTTCATGTTTCTATGCGGGTCTTGTAGTTG       |
| polyT_27 | TTTTTCAGCAGATTACTTATCCGTTTTT                    |
| polyT_28 | CGCGCAGATTCGGAAAAAGAGTTTTT                      |

## 2.2.4 sc\_EGFP4

### Scaffold sequence for sc\_EGFP4:

gttccgcgttacataacttacggtaaatggcccgcctggctgaccgccaacgacccccgccattgacgtcaataatgacgtatgtccata  
gtaacgccaatagggactttccattgacgtcaatgggtggagatattacggtaaactgccacttggcagtacatcaagtgatcatatgccaagt  
acgccccctattgacgtcaatgacggtaaatggcccgcctggcattatgccagtacatgaccttattggacttctacttggcagtacatctac  
gtattagtcatcgctattaccatgggtgatcggttttggcagtacatcaatggcggtgtagcggttgactcacggggatttcaagtccacc  
ccattgacgtcaatgggagtttggcaccaaaatcaacgggactttccaaaatgctgtaacaactccgccccattgacgcaaatggcggt  
aggcgtgtacggtgggaggctatataagcagagctggttagtaaccgtcagatcctgcagaagttggtcgtgaggcactgggcaggtgaag  
tatcaaggttacaagacaggttaaggagaccaatagaaactggcctgtcgagacagagaagactcttgcgtttctgataggcacctattggt  
cttactgacatccactttgcttctccacaggtgtccaggcgccgcatggtgagcaagggcgaggagctgttaccgggggtgtgccc  
cctggtcgtgactggcggcgacgtaaacggccacaagttcagcgtgtccggcgaggggcgaggcgatgccacctacggcaagctgacct  
tgaagttcatctgaccaccggcaagctgcccgtgccctggcccaccctcgtgaccacctgacctacggcgtcagtgcttccagccgtacc  
ccgaccacatgaagcagcagacttctcaagtcgcatgcccgaaggctacgtccaggagcgcaccatcttcaaggacgacggcaa  
ctacaagaccgcccggagggtgaagttcagggcgacaccctggtgaaccgcatcagctgaagggcatcagactcaaggaggacggca  
acatctggggcacaagctggagtacaactacaacgcccacaactctataatggccgacaagcagaagaacggcatcaaggtgaact  
tcaagatccgccacaacatcgaggacggcagcgtgcagctcggcaccactaccagcagaacacccccatcgcgacggccccgtgctg  
ctgcccgacaaccactactgagcaccagctccgcccgtgagcaaagacccccacgagaagcgcgatcacatggtctgctggagttcgtg  
accgcccggggatcactctcggcatggcagagctgtacaagtaataagcttggatccaatcaacctctggattacaaaatttgaagattg  
actggtattcttaactatgttctctttacgctatgttgatacgtctttaaagcttctgtatcatgctattgcttcccgtatggcttcttctcct  
gtataaatcctggtgctgctctttatgaggagttgtggcccgtgtcaggcaacgtggcggtgtgctgactggttctgacgcaacccccactg  
gttggggcattgccaccctgtcagctccttccgggacttccgcttccccctccctattgccacggcggaactcatcgccgctgctgccc  
ctgctggacaggggctcggctgttgggactgacaattcgggtgtgtcggggaaatcatcgtccttcttggctgctcgtgctgttgcac  
ggattctgcgcccggcagctcctctgctacgtccctcggccctcaatccagcggacctccttcccgccgctgctgcccgtctgcccctctcc  
gctctcagatctgctcactgtgcttctagttccagccatctgttggcttccccctccccgctccttccctgacctggaaggtgcccactccc  
actgcttcttaataaaaatgaggaaatgcatcgactgtctgagtaggtgtcattctattctgggggtgggggtggggcaggacagcaaggg  
ggaggattgggaagacaatagcaggcatgctgggactcagagtaagggcgaattcccgataaggatcttctagagcatggctacgtatgat  
aagtagcatggcgggtaataactacaaggaacccctagtgatggagttggcactccctctcgcgctcgtcgtcgtcactgaggccg  
ggcgaccaaaggtcggcgacggcgggcttggcccggggcctcagtagcagcagcagcgcgagcctaATTAAcattaagcgcg  
gcccgtgtggtgttacgcccagcgtgaccgtacacttgcagcgccttagcggccgctccttctcgttcttccctccttctcggccagttcgc  
cggcttccccgtaagctctaaatcgggggctccccttaggggtccgatttagtcttaccggcacctcagccccaaaaaactgattagggtgat  
ggttcacgtagtgggccatgcctgatagacggtttctgccccttggacttggagtcacgcttcttaatagtgacttcttccaaactggaaca  
aactcaaccctatcggcttattctttgattataagggatttggcatttccgctattggtaaaaaatgagctgattacaaaaaatttaacgc  
gaatttaacaaaatattaacgcttacaatttaggtggcacttttggggaaatgtgcgaggaaacccctattgttttttctaaatacattcaaat  
gtatccgctcatgagacaataaccctgataaatgctcaataatattgaaaaggaagatgatgattcaacattcgtgctgcccctattccc  
tttttggcgaatttgccttctgttttctcaccagaaacgctggtaagtaaaagatgctgaagatcagttgggtgacagagtggttacatc  
gaactggatcacaacagcggtaagatcctgagagtttcccccgaagaacgcttccaatgatgacactttaaagttctgctatgtggcgcg  
gtattatccgtattgacgcccggcaagagcaactcggctcggcgcatacactattctcagaatgacttgggtgagtagtaccagctcacagaaa  
agcatctacggatggcatgacagtaagagaattatgagtgctgcataaccatgagtgataaactgcggccaactacttctgacaacgat  
cggaggaccgaaggagtaaccgcttttgcacaacatgggggatcatgtaactcgcctgatcgttgggaaccggagctgaatgaagccat  
accaaacgacgagcgtgacaccagatgctgtagcaatggcaacaacgcttgcgcaactataactggcgaactactacttagcttccc  
ggcaacaattaatagactggatggaggcgataaagttcaggaccacttctcgcctcggccctccggctggctggttattgctgataaatct  
ggagccggtgagcgtgggtcacgcggtatcattgcagcactggggccagatggtgaagccctccgtagctagttatctacagcaggggag  
tcaggcaactatggatgaacgaaatagacagatcgtgagataggtgctcactgattaagcattggaactgtcagaccaagttactcata  
atacttagattgattaaaactcatttttaattaaaaggatctaggtgaagatccttttctgataatctcatgacaaaaatccctaacgtgagtttctg  
tccactgagcgtcagacccccgtagaaaagatcaaaaggatcttctgagatccttttctgctgataatctgctgctgcaaaaaaaaccac  
cgctaccagcgggtgttggttgcccggatcaagagctaccaactctttccgaaggtaactggctcagcagagcgcagataccaaaactgtc  
cttctagtagccgtagttaggccaccactcaagaactctgtagcaccgctacatacctcgtcgtatcctgttaccagtggtgctgcca  
gtggcgataagctgcttaccgggttgactcaagcagatagttaccggataagggcgacgggtcgggtgaacgggggggtctgtgcaca  
cagcccagcttggagcgaacgacctacccgaactgagatacctacagcgtgagctatgagaaagcggccagcttcccgaaggagaaa  
ggcggacaggtatccgtaagcggcagggctggaacaggagagcgcagggagctccagggggaaacgctggtatctttatagctc  
tgtcgggttccacactcgtactgagcgtcgttttgtgatgctcgtcaggggggggagcctatggaaaaacggcagcaacgcccctttt  
acggttctggccttttctgctccttttctcacCCTTAcattatgctctaggaagatcggaattcggcctaagctagctagttataatagtaac  
aattacggggctcattagttcatagccatataatgga

## Corresponding DNA origami designs and staple lists:

### 2.2.4.1 sc\_EGFP4 20HB

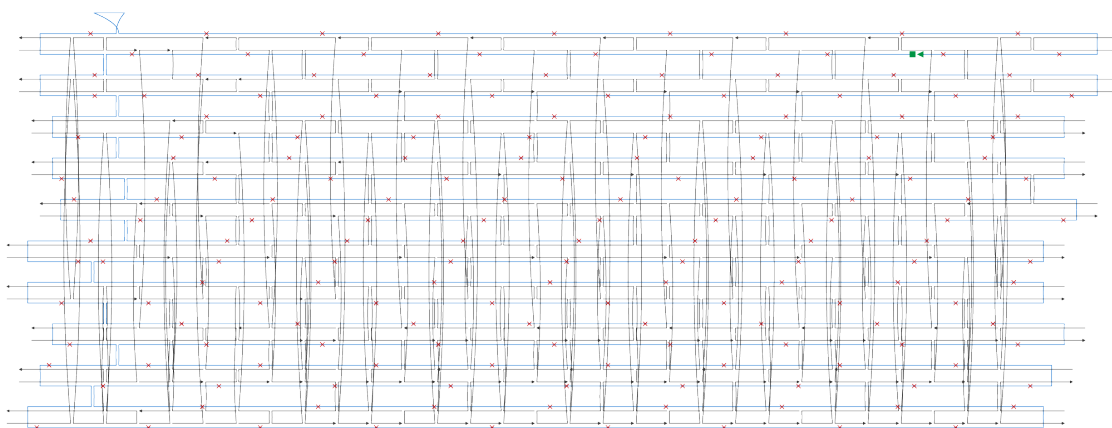

**Fig. S32 | Scaffold routing and staple design for sc\_EGFP4 20HB.** Scaffold routing is shown in blue, staples are given in black, breakpoint for addition of sequence is marked by a green square (5') and arrow (3'). Design was prepared using caDNAo v0.1.

**Table S19 | Individual staple sequences for sc\_EGFP4 20HB.**

| Name    | Sequence 5' - 3'                                                |
|---------|-----------------------------------------------------------------|
| core_1  | CAATGGAAGAAAGTCCATAAGGCTGTCTT                                   |
| core_2  | GAACATACATGACTAATACGTAGAGTGCCTC                                 |
| core_3  | GGGGTCGTCTGCCAAAACCGCATACGGTTCA                                 |
| core_4  | TTTACCGAGTCAAACCGCTATCACCTCCCA                                  |
| core_5  | TATATGGTCAATGGGGTGGAGACGCGTCAAT                                 |
| core_6  | GTC AATAGGGGGCGTAGCTCAGAAACGCAAGAGTCTTCTCTGTCTCGTTACCGT         |
| core_7  | TGGGCATGTAAATACTCCACCCAGGTGGCG                                  |
| core_8  | CCAAGTAGAGTCCCTATTGGCGTCGAGCATC                                 |
| core_9  | TAATAGCGGTCATTATTGACGTCTGGCGTTT                                 |
| core_10 | TTGATGTATGGGCGGTCAGCCAGAAGGCCAG                                 |
| core_11 | TCCCCGTGTAAGTTATGTAACGCGCATAATGT                                |
| core_12 | ACAAGCCGCAAAGTGGATGTCATGTCGCC                                   |
| core_13 | GGCGGCCGCTGGACACTTGTAGTCTGACTCCGCCGGAAG                         |
| core_14 | CGGTGAACAGCTCCTCGTGCGCTCCGATCTGTCAACTTTA                        |
| core_15 | CCGTCCAGCTCGACCACGGACTTGCAATGCTTTTGTGGCC                        |
| core_16 | GACACGCTGAACTTGGTCGGGGTATATATGCCAGTTAA                          |
| core_17 | GCCGTAGGTGGCATCTAGGTCATTAATAAATTGCTACA                          |
| core_18 | GCCCCAGCACCTCGGCGGGTCTGTGGTGGTAGCT                              |
| core_19 | TTGTGGCTCCTTGAAGAAGATGGCCCTTGGCTGGTAG                           |
| core_20 | GTTCTTCTTAGCCTTCGGGCATGGGGATGGGCAGCAGATT                        |
| core_21 | TGTGGCGGCGTGCTGCTTCATGTGTGGCCGTTAGAAGAT                         |
| core_22 | TCGGCGAGGAAGCACTGCACGCCGCCCTCGCGACGCTC                          |
| core_23 | GTCCGCGAACGAGGGTGGGCCAGACTTCAGGGGGATTTT                         |
| core_24 | AGGAGCAAGCATGATACAAAGGCGGCAGCAG                                 |
| core_25 | TCTTTACAGGAGAAAATGAAAGCGATTGAGG                                 |
| core_26 | GAAGCAATACATAGTTAAGAATACCAGTCAACAGCTTGCCAGCCACCGTCGTATACGGG     |
| core_27 | TACAAGGAAATTTTGAATCCAGAGGTTGATATAGCGGGTCTGCTATTTTCGCTTTAAA      |
| core_28 | TAAAGAGACAGCAACCCGTCCC GCGCAGCACT                               |
| core_29 | CTCCTCAAAGCTTATTACTTGTACAGCTCGTTGATGCCTCTATTAATAATCAGTGCTTCGGGG |
| core_30 | CGTTGCCTGACAACGGCGAGCAGTTGGCCG                                  |
| core_31 | CCACGCCAGAGAGTGATCCC GCGGCGGCTACTCGATGTGTAGTTCGAGTAACTGCTGTTGA  |
| core_32 | TGCGTCAGCAAACACCCGACAACCTCGGT                                   |
| core_33 | GTGGGGGTAGCAGGACCATGTGATCGCGCTTGGTAGTGGTGTGCCATGAAGTTTCGTGCACC  |
| core_34 | AGGTGGTGGCAATGCACAGCCGACCCCAT                                   |
| core_35 | GAGCTGACGGTCTTTGCTCAGGGCGGACTGGCGGGGCCCGCTCGTCGATCTTCACTTTACC   |
| core_36 | GCAGGCGGGGTTCCCAAGCATGCCGGTCGAGGTGCCGTAACACTACGCGCAAAAA         |
| core_37 | ACAGTCGAAAGGAAGTCCGCTGCATACGGGCAATAAA                           |
| core_38 | GCAAACAAGGACGTAGCAGAAGGAAGGATTTAGCAGAAGT                        |



|          |                                                                   |
|----------|-------------------------------------------------------------------|
| core_39  | CTTCCAGGCCAGGTGGCAACACAGGGCCACAACATCCAG                           |
| core_40  | TTTTATTAAAGGACGATGATTTCCAGTGCACAAGAGTAA                           |
| core_41  | CCTACTCAAATTGTCAGTGCCCACCCAACCACGCAACGT                           |
| core_42  | CCCACCCAGCAGCGGGCAAGCCGAAAGTGGTGTCA                               |
| core_43  | GGAGTGGGGCGCTGGCAAGTGTATAAATCAAAAATA                              |
| core_44  | TTGTAGTTAAGGGAAGAAAGCGATGAGTGTTCATGAGCG                           |
| core_45  | TATCTACGCGGGGAAAGCCGGCGAACTATTAATTATTGA                           |
| core_46  | TATCGGGACCCTAAAGGGAGCCCCGGGCGAAATGTTGAAT                          |
| core_47  | TCGCTCGCGTAGAGAATAGTGTATTCTGGCCC                                  |
| core_48  | AATCAGCTCATTTTTGCCGCGCTCTTGCCTTCTGTGATTTATCA                      |
| core_49  | ATCGGCAAAATCCCTAGCGGTGACGCCACACTCTTACGGCCGAGC                     |
| core_50  | AGACCGAGATAGGGTAAGGAGCGTCATTGGATCACTCATTCCGCCTC                   |
| core_51  | TTGGAACAAGAGTCCACGTGGCCTCAAGGACGTTGTCAGGGAAGCT                    |
| core_52  | GGACTCCAACGTCAAACGATTTATCGATGTAAAAAGCGTAGTTTG                     |
| core_53  | TATCAGGGCGATGGCCAGCCTAACTTACAGCAGGCGAGTGGCATCG                    |
| core_54  | TTTTGTATTGGTATCCAGTGTGAGTCTCGATGCGGTTACCAGGGGTAAGACC              |
| core_55  | TTCCCGAGTTTACCAATGCCAGGCGGGCCA                                    |
| core_56  | GCGCACATAGGCCGAAAAACCCGACAGGACTATAAAGATAGTGGGCAAAAGTGC            |
| core_57  | GGGGTTCCATAATACCCGCTGCGCGTGAGCGAGCGAGCGC                          |
| core_58  | GTATTTAGAAAAGAATACAAAATCGACGCTCAAGTCAGATTGACGTAACAAATAGGCAAAC     |
| core_59  | ATTTGAATAGTGCTCAGGCGCTAGCCAACCTCCATCACTAG                         |
| core_60  | TATTGTCTGTTCCAGTTTCCATAGGCTCCGCCCCCTGATACTATGGGATACATTTTTTTGT     |
| core_61  | ATCAGGGTCGAAAACGTGAGAAAGGAATGATTAACCCGCCA                         |
| core_62  | TTTTCAATAGAACGTGAACCGTAAAAAGGCCGCGTTGCAATGGGCGAGCATTTGAAAAAAA     |
| core_63  | TCTTCCTGATCCAGTGAGCTTGATAGCCATGCTCTAGG                            |
| core_64  | CACGGAAAAACCGTCAAGGGTGAGCAAAAGGCCAGCAAGCGGGCCAACTCATACCTTTTCTA    |
| core_65  | AGGGCGACAACCTGATATCGGAAATTCGCCCTTAACTC                            |
| core_66  | AAAATGCTGAACCATGGCGAATTCCGATCTTCTAGAGGAACTCCAAGGGAATAGAAAACCTC    |
| core_67  | GTACTCAAAGCCCGGATTAAGGCTGCGCGCTTAAATCGTTAATATATGATAC              |
| core_68  | CATCCGTAGGCCTCAGTAACCCACACCCCTAACCAAT                             |
| core_69  | TGTCATGCGCCGAAGCAGATGGCTGGCAACTAGAAGCGGTCGCCAGATGCTTCGGCGTCA      |
| core_70  | GGTTATGGCAGAATGTCAAGGAAGGCACGGGGGAGGGGCAGAGAGGCATAATTTAGCAGAA     |
| core_71  | GAAGTAAGCCAAGGAGGAAAGGACAGTGGGAGTGGCACGGGTTCCAGTGTTAAAACGTT       |
| core_72  | GTTAGCTCCACCACGGGACAATCCCATGCAATTTCTCTCATGCTACTCTCCGATTCTTACC     |
| core_73  | TACATGATGCCCTGTCCACCCCAGATGAATAGAATGACAAAGATCCTGTTGTGCCAAACCCACT  |
| core_74  | CTTACCAGCGGCGACTTGTAAAGTTTTGTAGTTTTCCCTTGGAAAGCTCCCTCTCCTTGCCA    |
| core_75  | CGGGAGGGGCTCCAGACTGGTGAGCCGCGGGGGCAGATCTCGAAGACGCGGAAGCCGGGCAA    |
| core_76  | GTAGATAAAAAAGAGTAGAGAAAGCAGTTTCTATTGGTCTCCTTAAACTCATGTACCTTGATCC  |
| core_77  | ATAGTTGCTGCCGTGCTGTTGTAGTTGTAATC                                  |
| core_78  | TTCATCCAAACCACCCTCACCATGTAACCTTGATACTTACCTGCCATGTACTGCGGTGGT      |
| core_79  | TATCTCAGCTGGACGGCTTGTGCGCCATGATTGGATCC                            |
| core_80  | AGGCACCTTGAAGCACCCACCCAGCAACTTCTGCAGGATCTGCACCATGGACGCGCA         |
| core_81  | CAGTTACAAGAAGTATCTTGAAGTTACCTCCATGCC                              |
| core_82  | TGGTCTGAGGATCTCATACGTCGCTAAACCAGCTCTGCTTATATAGCACGCCACCTTTGAT     |
| core_83  | TCTAAAGTAGCGGCTCTGCACGCTGCCGTCCGAACTCC                            |
| core_84  | TAAATCAACGGGGTCTCCTCGCCGCGTACACGCCTACCGCCATTTTTGGAAAAGTGGAAAC     |
| core_85  | CTTTTAAAGGGTGGTCTGGGGGTGTTCTGCTCTCGTTGG                           |
| core_86  | TGCTGAAGCATTGACACTTGATGTACTGCCAACCAGGC                            |
| core_87  | CCAGTTACCACCTAAACGAGTTGTAATGTTACGTGCGGGCAGCCTTT                   |
| core_88  | CTTCGACTACGATATCGAACTTGATGTTGCCGTCTCC                             |
| polyT_1  | TTTTTTATTAATAACTAGCTACCCGTAATTGATTACTTTTT                         |
| polyT_2  | TTTTTCGCTTACCGGATACCTCTGTTCCAGCAGCCAAAATTCGC                      |
| polyT_3  | CATTGACGGCTATGAACTAATGACGCTTAAGCACCCCTAATCATTTTT                  |
| polyT_4  | TTTTTATTTTTGGTGCCAAAACCTGAAAAGTCCCGTTGTTTT                        |
| polyT_5  | TTTTTTTCGGGAAGCGTGGCGCCGACAGTATCTGGTAACAGGATTTTTT                 |
| polyT_6  | GTCAGCTTGGGGCGGAGTTGTACGACATTTAAACTCCGGTCATGAGATTTTTT             |
| polyT_7  | TTTTTCGTTGGTGCAGATGAGGCACGGGCAGCTTGCTTTTT                         |
| polyT_8  | TTTTTTGTAGGTATCTCCAATGGCCTAACTACGGCTTTTTT                         |
| polyT_9  | TTTTTTTGTGCGGCAGCAGCAGTGTCTCAGGGAAGCGAAAAGTC                      |
| polyT_10 | TTTTTGCTCCAAGCTGGGCTGTCGTATCCACATAGCGTAAATTGAAGTGTACCCG           |
| polyT_11 | TTTTTCAATAGGGAGGGGTAGTGGTTTTT                                     |
| polyT_12 | TTTTTGTTCAGCCCGACCGCTCCGCAGAGCCATTAAG                             |
| polyT_13 | TTTTTTTCCCAATCCTCCCTTGTCTGCTGGAGTCCCACGATCAATCTTTTACCTAGATCACGTAA |
| polyT_14 | TTTTTCTTGAGTCCAACCCGCTGAGGCCGAGGGCGCCTTATCCGGTAACTATCGTTTTTT      |
| polyT_15 | TTTTTAGTTTTTTGGTGCTATTGTCTTTTT                                    |
| polyT_16 | TTTTTCGCCACTGGCGACCCTGCTTTTT                                      |
| polyT_17 | TTTTTGCAAAAACAGGAAGGCAGCGTTTCTGGGTGATTTTT                         |
| polyT_18 | TTTTTTAGCAGAGCGAGTCAAGTAAAGACACGACTTATTTTTT                       |
| polyT_19 | CCAAGTCAATCTGTATACCGCGCAGGTGCACGAACCCCCCTTTTT                     |

|          |                                            |
|----------|--------------------------------------------|
| polyT_20 | TTTTTTTCATTCAGCTCCCGATGAGTTCGCGCGTGGTTTTT  |
| polyT_21 | TTTTTGTTCTTGAAGTGGTGAGGCGGTGCTACAGATTTTT   |
| polyT_22 | TGACCCACCGATGCCCTTCAGTCGGTGTAGGTCGTTCTTTTT |
| polyT_23 | TTTTTTATCAAAAAGTTTGGTATGGCTTTTT            |
| polyT_24 | TTTTTACACTAGAAGTTTCTCCCTTTTT               |
| polyT_25 | TGCGCTCAATAGGTGCCTATTTCTCATAGCTCACGCTTTTT  |

## 2.2.5 sc\_EGFP5

### Scaffold sequence for sc\_EGFP5:

taggtgcgcgctcgtcgtcactgagccgcccgggcaaagcccgggctcgggcgacctttggctgcccggcctcagtgagcgagcg  
agcgcgcagagagggagtgccaactccatcactaggggttcctgtagtaaatgattaaccgcatgctactatctacgtagccatgctcta  
ggaagatcggaattcgccttaagctagctagtattaatagtaataatcaggggctcattagttcatagccatataatggagtccggttacat  
aactacggtaaatggcccgcctggctgaccgccaacgacccccgccattgacgtcaataatgacgtatgtcccatagtaacgccaatg  
ggactttccattgacgtcaatgggtggagatattacggtaaaactgccacttggcagtacatcaagtgtatcataatgccaagtacgccccattg  
acgtcaatgacggtaaatggcccgcctggcattatgccagtacatgacctatgggactttcctacttggcagtacatctacgtattagtcacgc  
tattaccatggtagcgggtttggcagtacatcaatgggctggatagcgggttgactcacggggattccaagtctccaccccattgacgtcaat  
gggagttgtttggcaccaaaatcaacgggactttccaaaatgctgtaaacactccgccccattgacgcaaatgggctgtaggctgtacggt  
gggaggtctatataagcagagctggttttagtaaccgtcagatcctgcagaagttggctgtaggctggcaggttaagtacaaggttaca  
agacaggttaaggagaccaatagaaactgggtgtcagacagagaagactctgctttctgataggcacctattggtctactgacatcca  
ctttgctttctccacaggtgtccaggcggccgcatggtgagcaagggcgaggagctgttaccgggggtggtgccatcctggtcgagctg  
gacggcgacgtaaacggccacaagttcagcgtgtccggcgaggcgaggcgatgccacctacggcaagctgaccctgaagttcatctgc  
accaccggcaagctgcccgtgcccggccaccctcgtgaccaccctgacctacggcggtgagtgctcagccgctaccccaccacatga  
agcagcacgacttctcaagtccgcatgcccgaaggctacgtccaggagcgcaccatcttctcaaggacgacggcaactacaagaccg  
cgccgaggtgaagttcagggcgacaccctggtgaaccgcatcgagctgaagggcatcgactcaaggaggacggcaacatcctggggc  
acaagctggagtacaactacaacgcccacaactgtctatcatgcccagacaagcagaagaacggcatcaaggtgaactcaagatccgcc  
acaacatcaggacggcagcgtgacgtcgcggaccactaccagcagaacccccatcgcgacggccccgctgctgctgcccgacaa  
ccactacctgagcaccagtcgcccgtgagcaaaagacccccaacgagaagcgcgacacatggtcctgctggagtctgtagccgcccgg  
gatacctcggcatggacgagctgtacaagtaataagctggatccaatcaacctctggattacaaaatttgtaagagattgactggtattctta  
actatgttctcctttacgctatgtggatacgtgctttaatgctttgatcatgctattgcttcccgtatggctttcttctcctctgtataaatcctg  
gttctgctctttatgaggagttgtggccgtgtcaggcaacgtggcggtgtgctgactgtttgtgacgcaacccccactggttggggcattg  
ccaccactgtcagctccttccgggactttcgtttccccctccctattgccacggcggaactcatcgccgctgcttcccgtgctggacag  
gggctcggctgttgggactgacaattccgtggtgtgtcggggaaatcatcgtccttctggctgctcgcctgtgttggcactggattctgcgc  
gggagctcctctgctacgtccttccggccctcaatccagggaccttcttcccggcctgctgcccgtctgccccttccgctcttcgag  
atctgctcagctgtgcttctagttgccagccatctgttttggccctccccctgcttcttaccctggaaggtgccactcccactgtccttct  
aataaaatgaggaaattgcatgcattgtctgagtaggtgtcattctattctgggggtggggtggggcaggacagcaagggggaggattggg  
aagacaatagcaggcatgctggggactcagtaagggcgaattcccgataaggatcttcttagagcatggtctagatagatagatagcagtg  
cgcattgccttaATTAAcattaagcgcggcggtgtggtggtacgcgcagcgtgaccgctacactgccagcgcctagcggccctcctt  
cgcttcttccctccttctcgcacgctcgcggcttccccgtaagctcctaaatcggggctccctttagggctccgatttagtcttacggcacc  
tcgacccccaaaaactgattagggtgtaggttcacgtagtgggccatcgccctgataagcggttttcgcctttgacgttggagtccacgttctt  
aatagtgactctgttccaaactggaacaactcaaccctatctcggctattctttgattataagggatttgcggatttcggcctattggttaa  
aaatgagctgatttaacaaaaatthaacgcaatttaacaaaatattaacgcttacaatttaggtggcacttttcggggaatgtgcgcggaacc  
cctattgttatttttctaataacattcaaatatgtatccgctcatgagacaataaccctgataaatgcttcaataatattgaaaaggaagatg  
agtattcaacattccgtgctgcccctattccctttttgcggtattttgctcaccagaaaacgctggtgaaagttaaagatgctga  
agatcagttgggtgcacgagtggttacatcgaactggatcacaacagcggttaagatccttgagagtttcccccgaagaacgtttccaatga  
tgagcacttttaagttctgctatgtggcgcggtattatcccgtattgacggggcaagagcaactcggctcggcgatacactatttcagaatg  
actggttagtactaccagtcacagaaaagcatcttacggatggcatgacagtaagagaattatgacgtgctgccataaccatgagtgata  
acactcggccaacttactctgacaacgatcggaggaccgaaggagcctaaccgctttttgacaacatgggggatcatgtaactgccttga  
tcgttgggaaccggagctgaatgaagccataccaacgacgagcgtgacaccacgatgctgtagcaatggcaacaacgttgcgcaaac  
attaactggcgaactacttactctagcttcccggcaacaataatagactggatggaggcggataaagttgcaggaccacttctgcgctcggcc  
cttccggctggtggttattgtgataaatctggagccggtgagcgtgggtcacgcggtatcattgcagcactggggccagatggtaagccctc  
ccgtatcgtagtattctacacgacggggagtcaggcaactatggatgaacgaaatagacagatcgtgagataggtgctcactgattaagca  
ttgtaactgtcagaccaagttactcatatatacttttagattgattaaaacttattttaaattaaaaggatctaggtgaagatccttttgataatctc  
atgacccaaaatccctaacgtgagtttctgctcactgagcgtcagaccccgtagaaaagatcaaggatctcttgagatcctttttctgctgct  
aatctgctgctgcaaacaaaaaaaccaccgctaccagcggtggtttgttgcgggatcaagagctaccaactctttccgaaggtaactggctt  
cagcagagcgcagataccaaatactgtccttctagtgtagccgtagttaggccaccactcaagaactctgtacaccgctacatacctcgtc  
ctgctaactcgttaccagtggtgctgcccagtgggataagtcgtgcttaccgggttgactcaagacgatagttaccggataaggcgcagc  
ggtcgggtgaacgggggggtcgtgcacacagcccagcttggagcgaacgacctacaccgaactgagatacctacagcgtgagctatgag  
aaagcggccacgctcccgaaggagaaaggcgacaggtatccggtaagcggcagggtcggaaacaggagagcgcacagggagcttc  
cagggggaaacgctggtatcttatactctgctgggttccaccctctgactgagcgtcgattttgtatgctcgtcagggggggcggagcct  
atgaaaaacgccagcaacgcggccttttacggtcctggcctttgtgacctttgtcacCTTAat

## Corresponding DNA origami designs and staple lists:

### 2.2.5.1 sc\_EGFP5 20HB

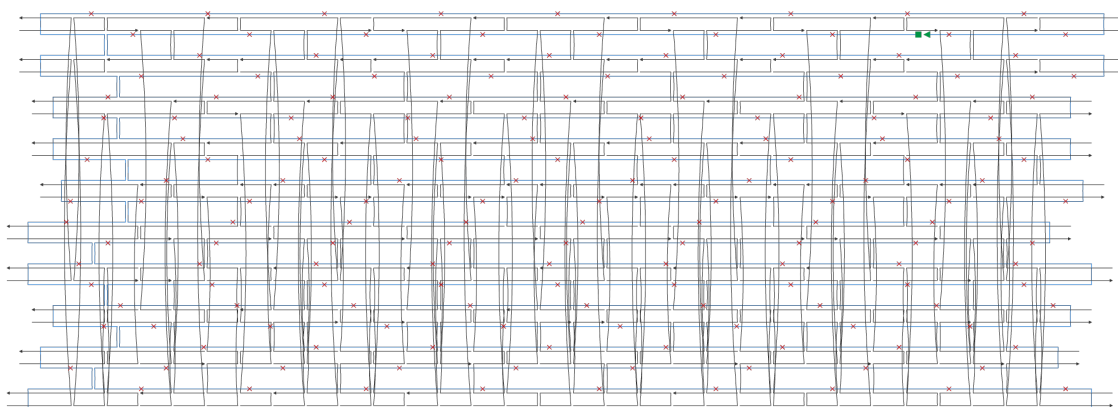

**Fig. S33 | Scaffold routing and staple design for sc\_EGFP5 20HB.** Scaffold routing is shown in blue, staples are given in black, breakpoint for addition of sequence is marked by a green square (5') and arrow (3'). Design was prepared using caDNAo v0.1.

**Table S20 | Individual staple sequences for sc\_EGFP5 20HB.**

| Name    | Sequence 5' - 3'                                                |
|---------|-----------------------------------------------------------------|
| core_1  | CAATGGAAGAAAAGTCCCATAAAGGCTGTCTT                                |
| core_2  | GAACATACATGACTAATACGTAGAGTGCCCTC                                |
| core_3  | GGGGTCGTCTGCCAAAACCGCATACGGTTCA                                 |
| core_4  | TTTACCGAGTCAAACCGCTATCACCTCCCA                                  |
| core_5  | TATATGGTCAATGGGGTGGAGACGCGTCAAT                                 |
| core_6  | GTCAATAGGGGGCGTAGCTCAGAAACGCAAGAGTCTTCTCTGTCTCGTTACCGT          |
| core_7  | TGGGCATGTAAATACTCCACCCAGGTGGCG                                  |
| core_8  | CCAAGTAGAGTCCCTATTGGCGTGCAGCATC                                 |
| core_9  | TAATAGCGGTCATTATTGACGCTGGCGTTT                                  |
| core_10 | TTGATGTATGGGCGGTCAGCCAGAAGGCCAG                                 |
| core_11 | TCCCCGTGTAAGTTATGTAACGCGCATAATGT                                |
| core_12 | ACAAGCCGCAAAGTGGATGTCATGTCGCC                                   |
| core_13 | GGCGGCCGCTGGACACTTGTAGTCTGACTCCGCCGGAAG                         |
| core_14 | CGGTGAACAGCTCCTCGTGCCTCCGATCTGCAACTTTA                          |
| core_15 | CCGTCCAGCTCGACCACGGACTTGCAATGCTTTTGTGGCC                        |
| core_16 | GACACGCTGAACTTGGTCCGGGTATATATGCCAGTTAA                          |
| core_17 | GCCGTAGGTGGCATCTAGGTCATTAATAAATTGCTACA                          |
| core_18 | GCCCCAGCACCTCGGCGCGGGTCTGTGGTGGTAGCT                            |
| core_19 | TTGTGGCTCCTTGAAGAAGATGGCCCTTGGCTGGTAG                           |
| core_20 | GTTCTTCTTAGCCTTCGGGCATGGGGATGGGCAGCAGATT                        |
| core_21 | TGTGGCGGGTGTCTGCTTTCATGTGTGGCCGTTAGAAGAT                        |
| core_22 | TCGGCGAGGAAGCACTGCACGCCGGCCCTCGCGACGCTC                         |
| core_23 | GTCCGCGAACGAGGGTGGGCCAGACTTCAGGGGGATTTT                         |
| core_24 | AGGAGCAAGCATGATACAAAGGCGGCAGCAG                                 |
| core_25 | TCTTTCACAGGAGAAAAATGAAAGCGATTGAGG                               |
| core_26 | GAAGCAATACATAGTTAAGAATACCAGTCAACAGCTTGTCCAGCCACCGTCGTATACGGG    |
| core_27 | TACAAGGAAATTTTGAATCCAGAGGTTGATATAGACGGGTCTGCTATTTGCTTTAAA       |
| core_28 | TAAAGAGACAGCAACCCGTCCCGCGCAGCACT                                |
| core_29 | CTCCTCAAAGCTTATTACTTGTACAGCTCGTTGATGCCTCTATTAATAATCAGTGCTTCGGGG |
| core_30 | CGTTGCCTGACAACGGCGAGCAGTTGGCCG                                  |
| core_31 | CCACGCCAGAGAGTATCCCGCGCGGCTACTCGATGTGTAGTTCCGAGTAACTGCTGTTGA    |
| core_32 | TGCGTCAGCAAACACCCGACAACCTTCGGT                                  |
| core_33 | GTGGGGGTAGCAGGACCATGTGATCGCGCTTGGTAGTGGTGTGCCATGAAGTTTCGTGCACC  |
| core_34 | AGGTGGTGGCAATGCACAGCCGACCCCAT                                   |
| core_35 | GAGCTGACGGTCTTTGCTCAGGGCGGACTGGCGGGGGCCCGCTCGTCGATCTTCACTTTACC  |
| core_36 | GCAGGCGGGGTTCCCAAGCATGCCGGTCCGAGGTGCCGTAACACTACGCGCAAAA         |
| core_37 | ACAGTCGAAAGGAAGTCCGCTGCATACGGGCAATAAA                           |
| core_38 | GCAAACAAGGACGTAGCAGAAGGAAGGATTTAGCAGAAGT                        |

|          |                                                                     |
|----------|---------------------------------------------------------------------|
| core_39  | CTTCCAGGCCAGGTGGCAACACAGGGCCACAACATCCAG                             |
| core_40  | TTTTATTAAAGGACGATGATTTCCAGTGCACAAGAGTAA                             |
| core_41  | CCTACTCAAATTGTCAGTGCCCACCCAACCACGCAACGT                             |
| core_42  | CCCACCCAGCAGCGGGCAAGCCGGAAGTGGTGTCA                                 |
| core_43  | GGAGTGGGGCGCTGGCAAGTGTATAAATCAAAAATA                                |
| core_44  | TTGTAGTTAAGGGAAGAAAGCGATGAGTGTTCATGAGCG                             |
| core_45  | TATCTACGCGGGGAAAGCCGGCGAACTATTAATTATTGA                             |
| core_46  | TATCGGGACCCTAAAGGGAGCCCCGGGCGAAATGTTGAAT                            |
| core_47  | TCGCTCGCGTAGAGAATAGTGTATTCTGGCCC                                    |
| core_48  | AATCAGCTCATTTTTGCCGCGCTCTTGCCTTGTGATTTATCA                          |
| core_49  | ATCGGCAAAATCCCTAGCGGTGAGCGCCACACTCTTACGCGCGAGC                      |
| core_50  | AGACCGAGATAGGGTAAGGAGCGTCATTGGATCACTCATTCCGCCTC                     |
| core_51  | TTGGAACAAGAGTCCACGTGGCCTCAAGGACGTTGTCAGGGAAGCT                      |
| core_52  | GGACTCCAACGTCAAACGATTTATCGATGTAAAAAGCGTAGTTTG                       |
| core_53  | TATCAGGGCGATGGCCAGCACTAACTTACAGCAGGCGAGTGGCATCG                     |
| core_54  | TTTTGTATTGGTATCCAGTGTGAGTCTCGATGCGGTTACCAGGGGTAAGACC                |
| core_55  | TTCCCGAGTTTACCAATGCCAGGCGGGCCA                                      |
| core_56  | GCGCACATAGGCCGAAAAACCCGACAGGACTATAAAGATAGTGGGCAAAAGTGC              |
| core_57  | GGGGTTCCATAATACCCGCTGCGCGTGAGCGAGCGAGCGC                            |
| core_58  | GTATTTAGAAAAGAATACAAAATCGACGCTCAAGTCAGATTGACGTAACAAATAGGCAAAC       |
| core_59  | ATTTGAATAGTGCTCAGGCGCTAGCCAACTCCATCACTAG                            |
| core_60  | TATTGTCTGTTCCAGTTTCCATAGGCTCCGCCCCCTGATACTATGGGATACATTTTTTTGT       |
| core_61  | ATCAGGGTCGAAAACGTGAGAAAGGAATGATTAACCCGCCA                           |
| core_62  | TTTTCAATAGAACGTGAACCGTAAAAAGGCCGCGTTGCAATGGGCGAGCATTTGAAAAAAA       |
| core_63  | TCTTCCTGATCCAGTGAGCTTGATAGCCATGCTCTAGG                              |
| core_64  | CACGGAAAAACCGTCAAGGGTGAGCAAAAGGCCAGCAAGCGGGCCAACTCATACCTTTTCTA      |
| core_65  | AGGGCGACAACCTGATATCGGAAATTCGCCCTTAACTC                              |
| core_66  | AAAATGCTGAACCATGGCGAATTCGATCTTCTAGAGGAACTCCAAGGGAATAGAAAACTC        |
| core_67  | GTAICTAAAGCCCGGATTAAGGCTGCGCGCTTAAATCGTTAATATATGATAC                |
| core_68  | CATCCGTAGGCCTCAGTAACCCACACCCCTAACCAAT                               |
| core_69  | TGTCATGCGCCGAAGCAGATGGCTGGCAACTAGAAGCGGTCGCCAGATGCTTCGGCGTCA        |
| core_70  | GGTTATGGCAGAATGTCAAGGAAGGCACGGGGGAGGGGCAGAGAGGCATAATTTAGCAGAA       |
| core_71  | GAAGTAAGCCAAGGAGGAAAGGACAGTGGGAGTGGCACGGGTTCCAGTGTTAAAAACGTT        |
| core_72  | GTTAGCTCCACCACGGGACAATCCCATGCAATTTCTCTCATGCTACTCCTCCGATTCTTACC      |
| core_73  | TACATGATGCCCTGTCCACCCCGAGATGAATGACAAGATCCTGTTGTGCCAAACCCACT         |
| core_74  | CTTACCAGCGGCGACTTGTAAAGTTTTGTAGTTTTCCCTTGGAAGCTCCCTCTCCTTGCCA       |
| core_75  | CGGGAGGGGCTCCAGACTGGTGAGCCGCGGGGGCAGATCTCGAAGACGCGGAAGCCGGGCAA      |
| core_76  | GTAGATAAAAAAGAGTAGAGAAAGCAGTTTCTATTGGTCTCCTTAAACTCATGTACCTTGATCC    |
| core_77  | ATAGTTGCTGCCGTGCTGTTGTAGTTGTAATC                                    |
| core_78  | TTCATCCAAACCACCCTCACCATGTAACCTTGATACTTACCTGCCATGTACTGCGGTGGT        |
| core_79  | TATCTCAGCTGGACGGCTTGTGCGCCATGATTGGATCC                              |
| core_80  | AGGCACCTTGCAAGCACCCACCCAGCAACTTCTGCAGGATCTGCACCATGGACGCGCA          |
| core_81  | CAGTTACAAGAAGTATCTTGAAGTTACCTCCATGCC                                |
| core_82  | TGGTCTGAGGATCTCATACGTCGCTAAACCAGCTCTGCTTATATAGCACGCCACCTTTGAT       |
| core_83  | TCTAAAGTAGCGGCTCTGCACGCTGCCGTCCGAACTCC                              |
| core_84  | TAAATCAACGGGGTCTCCTCGCCGCCGTACACGCCTACCGCCATTTTTGGAAAAGTGGAAAC      |
| core_85  | CTTTTAAAGGGTGGTCTGGGGGTGTTCTGCTCTCGTTGG                             |
| core_86  | TGCTGAAGCATTGACACTTGATGTAAGTCCCAACAGGC                              |
| core_87  | CCAGTTACCACCTAAACGAGTTGTAATGTTACGTGCGGGCAGCCTTT                     |
| core_88  | CTTCGACTACGATATCGAACTTGATGTTGCCGTCTCC                               |
| polyT_1  | TTTTTTATTAATAACTAGCTACCCGTAATTGATTACTTTTT                           |
| polyT_2  | TTTTTCGCTTACCGGATACCTCTGTTCCAGCAGCCAAAATTCGC                        |
| polyT_3  | CATTGACGGCTATGAACTAATGACGCTTAAGCACCCCTAATCATTTTT                    |
| polyT_4  | TTTTTATTTTTGGTGCCAAAACCTGAAAAGTCCCGTTGTTTT                          |
| polyT_5  | TTTTTTTCGGGAAGCGTGGCGCCGACAGTATCTGGTAACAGGATTTTTT                   |
| polyT_6  | GTCAGCTTGGGGCGGAGTTGTACGACATTTAAACTCCGGTCATGAGATTTTTT               |
| polyT_7  | TTTTTCGTTGGTGCAGATGAGGCACGGGCAGCTTGCTTTTT                           |
| polyT_8  | TTTTTTGTAGGTATCTCCAATGGCCTAACTACGGCTTTTTT                           |
| polyT_9  | TTTTTTTGTGCGGCAGCAGCAGTGTCTCAGGGAAGCGAAAAGTC                        |
| polyT_10 | TTTTTGCTCCAAGCTGGGCTGTCGTATCCACATAGCGTAAATTGAAGTGTACCCG             |
| polyT_11 | TTTTTCAATAGGGAGGGGTAGTGGTTTTT                                       |
| polyT_12 | TTTTTTGTCAGCCCGACCGCTCCGCAGAGCCATTAAG                               |
| polyT_13 | TTTTTTTCCCAATCCTCCCCTTGTCTGCTGGAGTCCCACGATCAATCTTTTACCTAGATCACGTTAA |
| polyT_14 | TTTTTCTTGAGTCCAACCCGCTGAGGCCGAGGGCGCCTTATCCGGTAACTATCGTTTTTT        |
| polyT_15 | TTTTTAGTTTTTTGGTGCTATTGCTTTTT                                       |
| polyT_16 | TTTTTCGCCACTGGCGACCCTGCTTTTT                                        |
| polyT_17 | TTTTTGCAAAAACAGGAAGGCAGCGTTTCTGGGTGATTTTT                           |
| polyT_18 | TTTTTTAGCAGAGCGAGTCAGTAAGACACGACTATTTTTT                            |
| polyT_19 | CCAAGTCATTCTGTATACCGCGCAGGTGCACGAACCCCCCTTTTT                       |

|          |                                            |
|----------|--------------------------------------------|
| polyT_20 | TTTTTTCATTAGCTCCCGATGAGTTCGCCGTGGTTTTT     |
| polyT_21 | TTTTGTTCCTTGAAGTGGTGAGGCGGTGCTACAGATTTTT   |
| polyT_22 | TGACCCACCGATGCCCTTCAGTCGGTGTAGGTCGTTCTTTTT |
| polyT_23 | TTTTTATCAAAAAGGTTTGGTATGGCTTTTT            |
| polyT_24 | TTTTTACACTAGAAGTTTCTCCCTTTTT               |
| polyT_25 | TGCGCTCAATAGGTGCCTATTTCTCATAGCTCACGCTTTTT  |

### 2.2.5.2 sc\_EGFP5 20HB-exL

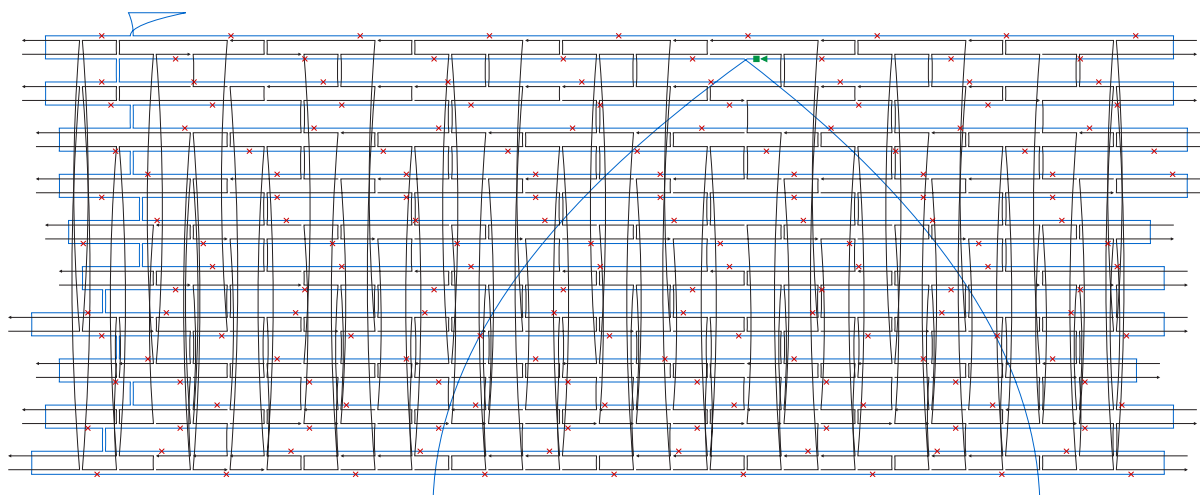

**Fig. S34 | Scaffold routing and staple design for sc\_EGFP5 20HB-exL.** Scaffold routing is shown in blue, staples are given in black, breakpoint for addition of sequence is marked by a green square (5') and arrow (3'). Design was prepared using caDNAo v0.1.

**Table S21 | Individual staple sequences for sc\_EGFP5 20HB-exL.**

| Name    | Sequence 5' - 3'                                                |
|---------|-----------------------------------------------------------------|
| core_1  | TTAACTACCTAATTAACCTCCACCCATTGACCATCACC                          |
| core_2  | GCGTTTTTAGGGGGCGTACTTGGCAAGGTCAT                                |
| core_3  | ATGTAACGCGGAACTCCCCTTGGAAAGTCCCGTTGATTTTGGTGCCACATTTACCTCTCAAGA |
| core_4  | GTAAGTTAACTAATGACCCCGTATCTCAGT                                  |
| core_5  | AAACAAACCCATTTGCGTCAATGGTGAACCTTAGTGGTCC                        |
| core_6  | AGACTTGGTATAGACCTCCCACCATCGCCCAAACCAGC                          |
| core_7  | ATCCACGCATCTGACGGTTCACTCTTGTGGCACGCTCA                          |
| core_8  | TAGATGTTTAAACCTGTCTTGTCTCGCCATAACTAC                            |
| core_9  | TGCCAGTGCCTCACACCAGGATGCCCCAG                                   |
| core_10 | GTCTCGACAAGCCCAGGACACCTGATCCATAG                                |
| core_11 | ACGCCGTAGCTTGCCGTAGGTGGCGTACACGC                                |
| core_12 | CATGTGGTGCCGGACACGCTGAAAACCAGC                                  |
| core_13 | GCATGGCGTCGCCGTCCAGCTCGGACCAACT                                 |
| core_14 | AAGATGGTCCCCGGTGAACAGCTAACCTTGA                                 |
| core_15 | CGGGTCTCATGGCGGCCCTGTTTCTAT                                     |
| core_16 | CAGGGTGAAAGGCAAAGTGGATGGCAAGAG                                  |
| core_17 | AGCACGGGTTGCTCAGGGCGGACTGTCCCGG                                 |
| core_18 | GCTGGTAGACCATGTGATCGCGCATGCCCCA                                 |
| core_19 | GTCTCGGATCCCGGCGGGTACACAGTG                                     |
| core_20 | CACCTTGAATTACTTGTACAGCTAACGGGCC                                 |
| core_21 | ATGATATATGTAATCCAGAGGTTAACCAGGA                                 |
| core_22 | ACTCCAGCTTAAGAATACCAGTCAAGCCATA                                 |
| core_23 | GGGGTCTGCCGTGCCGATGGGGGTGTTCTAGCACTGCTTTCGCGCACAGCCGGA          |
| core_24 | CCAGCAGGTGGTGGCGAGCTGCACGCTGCCTGCTGCTTATCGTGGTCCGGCTCC          |
| core_25 | CCGAGAGTATGTTGTGGCGGATCTTGAAGTTCCTTCGGCTTCATTCTGCTGCAA          |
| core_26 | CCAAGCTTTGCCGTTCTTCTGCTTGTGGCCCTTGAAGGCGAGTTAGATACGG            |
| core_27 | ACAAATTTGACGTTGTGGCTGTTGAGTTGTCCTCGGCCGAAAGCGGTTGCCTG           |
| core_28 | GGTTGCGTACAGCAACACGAACTCTACAGGC                                 |
| core_29 | GCCACGTTGCCTGACCGTCCATGTGGTATGG                                 |
| core_30 | TCATAAAGAGACAGCGATTGGATCGATCAAG                                 |

|          |                                                                    |
|----------|--------------------------------------------------------------------|
| core_31  | AAGGAGGAGAAAATGAAATCTTTCTGTGCAA                                    |
| core_32  | GCGGCGATTGACAGGTGGTGGCATTCTCGTTTTAATAG                             |
| core_33  | GAGGGCCGCAATAGCATGATACAAAAGGAGTCCGATCG                             |
| core_34  | TCCCAATCAGTGCGAAAACCTCTATCCGC                                      |
| core_35  | GGAAGGGAAGAAAGCGAGCTTGACTCATGA                                     |
| core_36  | AGTTTGAACAAGAGTCTCGAGTTTGAGATCTTTAAAAGTTCCGCCAG                    |
| core_37  | GTGGACTCCAACGTCAAGGAAGACACCCAATACGGGATGCCATTG                      |
| core_38  | TCTATCAGGGCGATGGGCCATGCTCACCAGCCGGCGACCCGTCGTT                     |
| core_39  | ATCACCTAATCAAGCCGCCGCGAAGGCAAATCAACAGTCCCAA                        |
| core_40  | TGCCGTAAGCACTAGTAGCGGTGCGACACGCGTAAGACCCCATGT                      |
| core_41  | GGAGCCCCCGATTTAGAAAGGAGTCCTTTTTCACTGCAT                            |
| core_42  | CAAAATCCTACCCTGCCAGCACCCCAAGAATAGAATG                              |
| core_43  | AAATCGGAGATCCTTGCGCAGACAGGGTCAGGTCAGGGTGGTCAC                      |
| core_44  | ATAGGCCGCTATTAAGTCAGCCAGGCGGGC                                     |
| core_45  | ATTTTTGTTCCGATCATTGACGTCAATGGG                                     |
| core_46  | AGCGTTAATAAGTAGCTATTGGCGTACTAT                                     |
| core_47  | CGAAAAGTCACCTAGACCATCTGGGGCACCAGCGCTCCTGGACGTAG                    |
| core_48  | AGAAAAAGGCCAGGATGTAAGTCCAAAGTGGG                                   |
| core_49  | AAGGATCTCTATAAATTGTTCTCGGTGTAGGTCGTTGCTCCTGCCATATATGATAGACC        |
| core_50  | CAGTTCGAGGGCCGATGATCTTTCTACCCTCCATTGACGTCAATGGGGTGGCGGGGGTC        |
| core_51  | ATGTAACCTTAACCAAAAGAACTCTCATAGCTCACGCTGTAGGTAATTGATTA              |
| core_52  | CTGATCTTAGATTTATGAACGAATCTGCTTAAAATCCCCGTGAGTCAAACCGCTGGGAACAT     |
| core_53  | CAGCATCTCGCGTTAAAAAACCCGCGCTTTCTCCCTCGGGAAGCGGGCGAATAAATCAG        |
| core_54  | GTTTCTGGTGATACCGATGAGATTCTGCAGGCCATTGATGTAAGTCCAAAACCGGTCAATGG     |
| core_55  | GTGAGCAAAATTGTACGTGAACCTCCGACCCTGCCGCTTACCGGAACGTAGATATTTGT        |
| core_56  | ATGCCGAGAGGGCTTATCCTTTTTACTTACCATGGTAATAGCGATGACTAATACGCAGTTA      |
| core_57  | AAAAAGGGCCGCGCAGGTGAGGCCCCCTGGAAGCTCCCTCGTGCG                      |
| core_58  | GAAATGTTACTCCCCGCAATCTAATGGTCTCCACTGCCAAGTAGGAAAGTCCCATATATGAT     |
| core_59  | GAATACTATGATTTCCCTAAAGCCCGACAGGACTATAAGATACCCAGCAAAATAACAAA        |
| core_60  | ATTGGAACACCCCACTGCCTGCTATTGCTGTTGAGTGTCAAAGAGGCTATG                |
| core_61  | GCCACATCTCAGACAGGGAATTCGCCCTTAACCACTATT                            |
| core_62  | CTTGCCCGATTAGGAATACGTAGCCATGCTCTAAGGGCG                            |
| core_63  | TGAGAATACAGGGTCATTAATTAAGGCAATGCCCACTA                             |
| core_64  | TGTGACTGACAACAGAGCGTAACCACCACACTTTTTGGCATTTC                       |
| core_65  | TACTGTCTCGAGGCAGGGCGCTGGCAAGTAATCGGAA                              |
| core_66  | GTAAGTAGTGCTCATCAAAGGAGCGAGTTCCGCCGTGGCAATAGGGACCTGCC              |
| core_67  | ACGTTGTTAATACCGCACCAGTGGCTGTCCAGCAGCGGGCAAGGCAGACACCTAAGCAGAAC     |
| core_68  | GTCACGCTGAGTTGCTCACACCACACGGAATTGTCAGTGCCCAACAGCTCATTTTGCCTCAA     |
| core_69  | AGCTCCGAGTCATTACAACCTCCAGGAAAGGACGATGATTTCCCGGCACCTTCGTGTATG       |
| core_70  | CATGATCTGCTTTTCTTTATACGAATCCAGGTGGCAACACAGGGCAAGGGGCAAGTGAGTAC     |
| core_71  | TTAGCTCCAATTCTCCGGGAAGAAGGGACGTAGCAGAAGGACGTGAGGCACAGATGCCATC      |
| core_72  | TTCGGTCCCAACATAGTTGTGCCAGGATGTTGCCGTC                              |
| core_73  | AGATTACGCTCCATCCGACGAGCTTGCCGGTGGTGCAGAGGCGGAGTAAAAGGA             |
| core_74  | TCTACGGGTTGGGCGTAACTAGCTAGCTTAATGGCGCTT                            |
| core_75  | GGTCTGACCTCATTCACTCGTGTCTTATCATGCGATGCAATTTCCCGAGCCC               |
| core_76  | GCTCAGTGCAGCAATTCGCCCTCCGGGGTAGCGGCTGA                             |
| core_77  | AACTCAGCAGCTCATTTCCTAGAGCATGGCTTACCTGTC                            |
| core_78  | TTAAGGGATAAAATTTTACTTTACTTATCAGGACAGTGGGAGTGACAACACC               |
| core_79  | TTTTGGTCCGTGACCCGTTTACGGACTTGAAGAAGTCCG                            |
| core_80  | TATCAAAAAAGTCCCATGGCGGGTTAATCACTCTCCTG                             |
| core_81  | AGGATCTTGCCACCTAAAACAGGCTTAATGAGGAAGGCACGGGGGGCAGCCA               |
| core_82  | AAATTAACCGTAAATGGGTGAGCAAAGGCAGGCGTTT                              |
| core_83  | AATGAAGTTAGGGGTTAATAAGGCACGCTGCTGGCTGGCAACTAGACCGCGCA              |
| core_84  | TTTAAATTGCTGTAGTTGCTCACTGTAGTTGCCGTCGTC                            |
| core_85  | AGTATAAACACTTGAACCGTAAAAAGGCCGTGGCGAAA                             |
| core_86  | TGAGTAAATATTTGACATACTCTCGGGCGCTAGATCTCGAAGACGCG                    |
| core_87  | ACTTGGTCTTTGTTCTGGAGAGTCCCTCGAACTTCA                               |
| polyT_1  | TTTTTACGAGCATCACAGCCGGCGAACTTTTT                                   |
| polyT_2  | TTTTTAGCCCGACCGCTGCGCACGAACCGCTCTGCGAGATAGG                        |
| polyT_3  | TTTTTTACCGTCATTGATTAATCAGTGTTTT                                    |
| polyT_4  | TTTTTTCGTTGAGTCCAACTTATCCAAGCAGCTGAAGCCAGTTACTTTTT                 |
| polyT_5  | TTTTTGGTGCCTATCAGAAACTCAGTAAGACCAATATTTTT                          |
| polyT_6  | TTTTTTCGCCACTGGCAAGTGTGGTAGCGGTGGTTTTTTTT                          |
| polyT_7  | CGGTTCACTTGTGAGTCAGCGATTTGAAGCATTTATTTTT                           |
| polyT_8  | TTTTTCCCTTCAGCTCGATGCTCCTTGAAGTCTGATTTTTT                          |
| polyT_9  | TTTTTTAGCAGAGCGAGGTATGTAGTGGTTGTCGGGCGAGCGAGGGTGGAAAGCTAGATGCAACTT |
| polyT_10 | TTTTTGTATCCACATAGCGTAAGGCATTTCTATGGTCCGAGAG                        |
| polyT_11 | TTTTTAGTTCTTGAAGTGGTGGAAAGCGAAAGGGTGTCT                            |
| polyT_12 | TTTTTCCGCGGGGAAGGAGGTCGCTGGATTGAAGAGGCTATGGCAGCAATATTA             |

|          |                                                                  |
|----------|------------------------------------------------------------------|
| polyT_13 | TTTTTCTACACCCCTTGCTGTGGGGGCCTAACTACGGTTTTT                       |
| polyT_14 | TTTTTGTGGCGAGAAACCGGCAGCAGGTTTTT                                 |
| polyT_15 | TTTTTTGGTATCTGCCCCCGTTCTTTTT                                     |
| polyT_16 | TTTTTTCAGGGTATTGTGCGGGGAAAAAATCGACGCTCAAGTCAGAGGCGTTGCTGGCGGATAC |
| polyT_17 | TTTTTCTTCGGAAAAAGCTCCTAGAAGGACAGTATTTTTT                         |
| polyT_18 | AACGTTCTTCGGGTGGTTAATTGTCAGGTAGGCGGTGCTACAGTTTTT                 |
| polyT_19 | TTTTTGCAGTGTTATCAAAAGCAGCTTTTT                                   |
| polyT_20 | TTTTTAAACAAACCACCCTATAGCTCTTGATCCGGCTTTTT                        |
| polyT_21 | TGCCGGGGCCAGGGCACGGGCCACTGGTAACAGGATTTTT                         |
| polyT_22 | CTGCTATGACAGTTTCTTCTGTACTGGGCATAATGCCAGGCGGGCCATTTTTT            |
| polyT_23 | TTTTTAGGCACCTATCAAGTAAGTTGGCCTTTTT                               |
| polyT_24 | TTTTTTTTTTGTTTGCGGTAACTATTTTT                                    |
| polyT_25 | CGCAGAAATGTTACGACATTGGTAAGACACGACTTATTTTT                        |
| polyT_26 | ACCAATGCCGTC AATCCATAGGCTCCGCCCCCTGTTTTT                         |

### 2.2.5.3 sc\_EGFP5 20HB-exLP

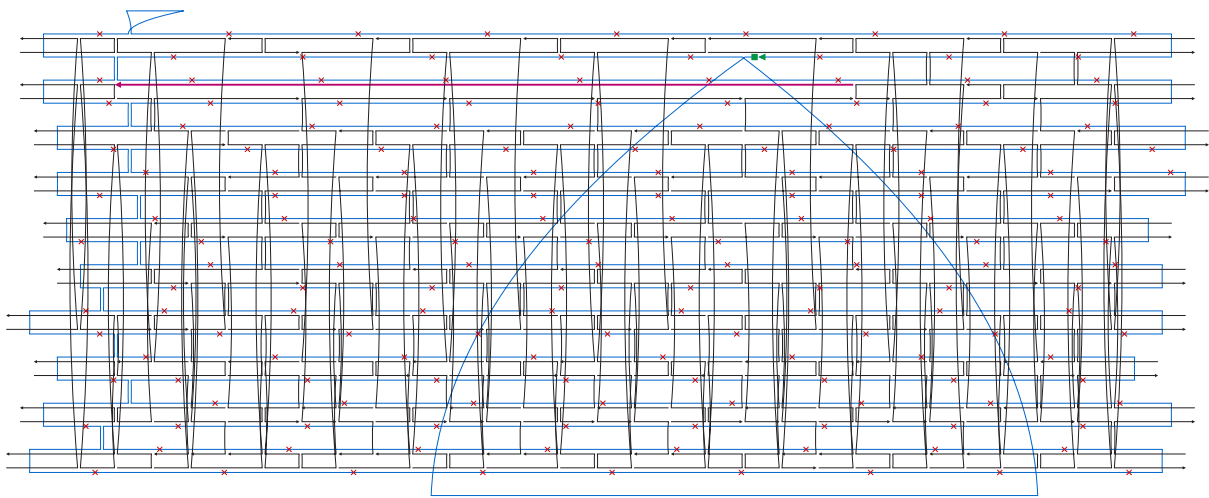

**Fig. S35 | Scaffold routing and staple design for sc\_EGFP5 20HB-exLP.** Scaffold routing is shown in blue, staples are given in black, breakpoint for addition of sequence is marked by a green square (5') and arrow (3'). Long 154-mer 'primer' sequence at the promoter (5') region is given in pink. Design was prepared using caDNAno v0.1.

**Table S22 | Individual staple sequences for sc\_EGFP5 20HB-exLP.**

| Name    | Sequence 5' – 3'                        |
|---------|-----------------------------------------|
| core_1  | TTAACTACCTAATTAAGGGTGAGCAAAAGGCAGGCGTTT |
| core_2  | GCGTTTTTAGGGGGCGTACTTGGCAAGGTCAT        |
| core_3  | GGCGGAGTAAAAGGATCTCAAGACAAAATCC         |
| core_4  | CCATTTGCGTCAATGGTGAACCTAGTGGTCC         |
| core_5  | TATAGACCTCCCACCATCGCCCAAACCAGC          |
| core_6  | ATCTGACGGTTCACTCTTGTGGCAGCTCA           |
| core_7  | TGCCCAGTGCCTCACACCAGGATGCCCCAG          |
| core_8  | TTAAACCTGTCTTGTCTCGCCATAACTAC           |
| core_9  | GTCTCGACAAGCCCAGGACACCTGATCCATAG        |
| core_10 | ACGCCGTAGCTTGCCGTAGGTGGCGTACACGC        |
| core_11 | CATGTGGTGCCGGACACGCTGAAAAACCAGC         |
| core_12 | GCATGGCGTCGCCGTCCAGCTCGGACCAACT         |
| core_13 | AAGATGGTCCCCGGTGAACAGCTAACCTTGA AAAATTA |
| core_14 | CGGGTCTCATGGCGGCCGCCTGTTTCTAT           |
| core_15 | CAGGGTGAAAGGCAAAGTGGATGGCAAGAG          |
| core_16 | AGCACGGGTTGCTCAGGGCGGACTGTCCCGG         |
| core_17 | GCTGGTAGACCATGTGATCGCGCATGCCCCA         |
| core_18 | GTCCTCGGATCCCGGGCGGGTACACAGTG           |
| core_19 | CACCTGAATTACTTGTACAGCTAACGGGCC          |
| core_20 | ATGATATATGTAATCCAGAGGTTAACCAGGA         |
| core_21 | ACTCCAGCTTAAGAATACCAGTCAAGCCATA         |



|         |                                                                                                                                                                 |
|---------|-----------------------------------------------------------------------------------------------------------------------------------------------------------------|
| core_22 | GGGGTCTGCCGTCGCCGATGGGGGTGTTCTAGCACTGCTTTGCGCACAGCCGGA                                                                                                          |
| core_23 | CCAGCAGGTGGTCCGCGAGCTGCACGCTGCCTGCTGCTTATCGTGGTCCGGCTCC                                                                                                         |
| core_24 | CCGAGAGTATGTTGTGGCGGATCTTGAAGTTCCTTCGGCTTCATTCTGCTGCAA                                                                                                          |
| core_25 | CCAAGCTTTGCCGTTCTTCTGCTTGTGCGCCCTTGAAGGCGAGTTAGATACGG                                                                                                           |
| core_26 | ACAAATTTGACGTTGTGGCTGTTGTAGTTGTCTCGGCGAAAGCGGTTGCCTG                                                                                                            |
| core_27 | GGGTTGCGTCAGCAACACGAACCTCTACAGGC                                                                                                                                |
| core_28 | GCCACGTTGCCTGACCGTCCATGTGGTATGG                                                                                                                                 |
| core_29 | TCATAAAGAGACAGCGATTGGATCGATCAAG                                                                                                                                 |
| core_30 | AAGGAGGAGAAAATGAAATCTTTCTGTGCAA                                                                                                                                 |
| core_31 | GCGGCGATTGACAGGTGGTGGCATTCTCGTTTTAATAG                                                                                                                          |
| core_32 | GAGGGCCGCAATAGCATGATACAAAAAGGAGTCCGATCG                                                                                                                         |
| core_33 | TCCAATCAGTGCGAAAACCTCTATCCGC                                                                                                                                    |
| core_34 | TCCTTATCATGCGATGCAATTTCCCGAGCCC                                                                                                                                 |
| core_35 | ACTTATCAGGACAGTGGGAGTGACAACACC                                                                                                                                  |
| core_36 | CTTAATGAGGAAGGCACGGGGGGCAGCCA                                                                                                                                   |
| core_37 | GGAAGGGAAGAAAGCGAGCTTGACTCATGA                                                                                                                                  |
| core_38 | AGTTTGGAAACAAGAGTCTCGAGTTTGAGATCTTAAAAGTTCGCCAG                                                                                                                 |
| core_39 | GTGGACTCCAACGTCAAGGAAGACACCCAATACGGGATGCCATTG                                                                                                                   |
| core_40 | TCTATCAGGGCGATGGGCCATGCTCACCAGCCGGCGACCCGTCGTT                                                                                                                  |
| core_41 | ATCACCTAATCAAGCCGCCGCGAAGGCAATCAACCAGTTCCAA                                                                                                                     |
| core_42 | TGCCGTAAGCACTAGTAGCGGTGCGACACGCGTAAGACCCCATGT                                                                                                                   |
| core_43 | GGAGCCCCGATTTAGAAAGGAGTCCTTTTCACTGCAT                                                                                                                           |
| core_44 | TCAAAAGAGGCTATGAACTAATGACCCCGTATCTCAT                                                                                                                           |
| core_45 | AAATCGGAGATCCTTGCAGACAGGGTCAGGTCAGGGTGGTCAC                                                                                                                     |
| core_46 | ATAGGCCGCTATTAATAACTAGCTAGCTTAATGGCGCTT                                                                                                                         |
| core_47 | ATTTTTGTTTCCGATCTTCTAGAGCATGGCTTACCTGTC                                                                                                                         |
| core_48 | AGCGTTAATAAGTAGCATGGCGGGTTAATCACTCTCCTG                                                                                                                         |
| core_49 | CGAAAAGTCACCTAGACCATCTGGGGCACCAGCGCTCCTGGACGTAG                                                                                                                 |
| core_50 | AGAAAAGGCCAGGATGTACTGCCAAGTGGGTAGATGT                                                                                                                           |
| core_51 | AAGGATCTTTATAAATTGTTCTCGGTGTTAGGTCGTTCTGCTCCTGCCATATATGATAGACC                                                                                                  |
| core_52 | TACCGCTGCCCCAGCACCCCCAGAATAGAATG                                                                                                                                |
| core_53 | CAGTTCGAGGGCCGATGATCTTTCTACCGCTCCCATTGACGTCAATGGGGTGGAGACTTGG                                                                                                   |
| core_54 | ATGTAACCTTTAACCAAAAGAACTCTCATAGCTCACGCTGTAGGTAATTGATTA                                                                                                          |
| core_55 | CTGATCTTAGATTTATGAACGAATCTGCTTAAAATCCCCGTGAGTCAAACCGCTATCCACGC                                                                                                  |
| core_56 | CAGCATCTCGGTTAAAAAACCCGCGCCTTTCTCCCTTCGGGAAGCGGGGCGAATAAATCAG                                                                                                   |
| core_57 | GTTTCTGGTGATACCGATGAGATTCTGCAGGCCATTGATGTACTGCCAAAACCCGATCACC                                                                                                   |
| core_58 | GTGAGCAAAATTGTACGTGAACCTTCCGACCCTGCCGCTTACCGGAACGTAGATATTTTGT                                                                                                   |
| core_59 | ATGCCGCAGAGGGCTTATCCTTTTACTTACCATGGTAATAGCGATGACTAATACG                                                                                                         |
| core_60 | AAAAAGGGCCGCGCAGGTCGAGGCCCCCTGGAAGCTCCCTCGTGCG                                                                                                                  |
| core_61 | GAAATGTTACTCCCCGCAATCTAATGGTCTCCACTGCCAAGTAGGAAAGTCCCATATATGAT                                                                                                  |
| core_62 | GAATACTATGATTTCCCTAAAGCCCCACAGGACTATAAAGATACCCAGCAAAAATAACAAA                                                                                                   |
| core_63 | ATTGGAACACCCCACTGCCTGCTATTGTCTGTTGAGTG                                                                                                                          |
| core_64 | GCCACATCTCAGACAGGGAATTCGCCCTTAACCACTATT                                                                                                                         |
| core_65 | CTTGCCCCGATTAGGAATACGTAGCCATGCTCTAAGGGCG                                                                                                                        |
| core_66 | TGAGAATACAGGGTCATTAATTAAGGCAATGCCCCACTA                                                                                                                         |
| core_67 | TGTGACTGACAACAGAGCGTAACCACCACACTTTTTTGGCATTTC                                                                                                                   |
| core_68 | TTACTGTCTCGAGGCAGGGCGCTGGCAAGTAATCGGAA                                                                                                                          |
| core_69 | GTAAGTAGTCTCATCAAAGGAGCGAGTTCGCCCGTGGCAATAGGGACCTGCC                                                                                                            |
| core_70 | ACGTTGTTAATACCGCACCGATGGCTGTCCAGCAGCGGGCAAGGCAGACACCTAAGCAGAAC                                                                                                  |
| core_71 | GTCACGCTGAGTTGCTCACACCACACGGAATTGTCAGTGCCCAACAGCTCATTITGCGTCAA                                                                                                  |
| core_72 | AGCTCCGAGTCATTCACTCCAGGAAAGGACGATGATTTCCCGGCACCTTCGTGTATG                                                                                                       |
| core_73 | CATGATCTGCTTTTCTTATACGAATCCAGGTGGCAACACAGGCGAAGGGGCAAGTGAGTAC                                                                                                   |
| core_74 | TTAGCTCCAATTCTCCGGGAAGAAGGGACGTAGCAGAAGGACGTCAGGCACAGATGCCATC                                                                                                   |
| core_75 | TTCCGGTCCCAACATAGTTGTGCCCAAGGATGTTGCCGTC                                                                                                                        |
| core_76 | AGATTACGCTCCATCCGACGAGCTTGCCGGTGGTGCAGA                                                                                                                         |
| core_77 | CGCAGAAATGTTACGAAGTCCCGTTGATTTTGGTGCCAAAACAAAC                                                                                                                  |
| core_78 | TCTACGGGGTCTGACCTCATTCTACTCGTG                                                                                                                                  |
| core_79 | GCTCAGTGCAGCAATTCGCCCTCCGGGGTAGCGGCTGA                                                                                                                          |
| core_80 | AACTCACGTTAAGGGATAAAAATTTTACTTT                                                                                                                                 |
| core_81 | TTTTGGTCCGTGACCCCGTTTACGGACTTGAAGAAGTCG                                                                                                                         |
| core_82 | TATCAAAAAGGATCTTGCCACCTAAAACAGG                                                                                                                                 |
| core_83 | AATGAAGTTAGGGGTTAATAAGGCACGCTGCTGGCTGGCAACTAGACCGCGCA                                                                                                           |
| core_84 | TTTAAATTCGTGTAGTTGCTCACTGTAGTTGCCGTCGTC                                                                                                                         |
| core_85 | AGTATAAACACTTGAACCGTAAAAAGGCCGTGGCGAAA                                                                                                                          |
| core_86 | TGAGTAAATATTTGACATACTCTCGGGCGCTAGATCTCGAAGACGCG                                                                                                                 |
| core_87 | ACTTGGTCTTTCTGTTCTGGAGAGTCGCCCTCGAACTTCA                                                                                                                        |
| core_89 | CAGTTTACCGTAAATACTCCACCCATTGACGTCAATGGAAAGTCCCTATTGGCGTTACTATGGGAACATAC<br>GTCATTATTGACGTCAATGGCGGGGTCGTTGGCGGTACGCCAGGCGGGCCATTTACCGTAAGTTAT<br>GTAACGCGGAACCT |

|          |                                                                   |
|----------|-------------------------------------------------------------------|
| polyT_1  | TTTTTACGAGCATCACAGCCGGCGAACTTTTT                                  |
| polyT_2  | TTTTTAGCCCGACCGCTGCGCACGAACCGCTCTGCGAGATAGG                       |
| polyT_3  | TTTTTTACCGTCATTGATTAATCAGTGTTTTT                                  |
| polyT_4  | TTTTTCGTCTTGAGTCCAACCTTATCCAAGCAGCTGAAGCCAGTTACTTTTT              |
| polyT_5  | CCCTTGGAACATTGGTAAGACACGACTTATTTTT                                |
| polyT_6  | TTTTTGGTGCCTATCAGAAACTCAGTAAGACCAATATTTTT                         |
| polyT_7  | TTTTTCGCCACTGGCAAGTGCTGGTAGCGGTGGTTTTTTTT                         |
| polyT_8  | CGGTTCACTTGTCAGTCAGCGATTTGAAGCATTATTTTT                           |
| polyT_9  | TTTTTCCCTTCAGCTCGATGCTCCTTGAAGTCGATGTTTTT                         |
| polyT_10 | TTTTTTAGCAGAGCGAGGTATGTAGTGGTTGTCGGGCAGCGAGGGTGAAGCTAGATGCAACTT   |
| polyT_11 | TTTTTGATCCACATAGCGTAAGGCATTCTCATGGTCGCAGAG                        |
| polyT_12 | TTTTTAGTTCTTGAAGTGGTGGAAAGCGAAAGGGTGCT                            |
| polyT_13 | TTTTTCCGCGGGAAGGAAGGTCCGCTGGATTGAAGAGGCTATGGCAGCAATATTA           |
| polyT_14 | TTTTTCTACACCCCTTGCTGTGGGGGCCTAACTACGGTTTTT                        |
| polyT_15 | TTTTTGTGGCGAGAAACCGGCAGCAGTTTTT                                   |
| polyT_16 | TTTTTTGGTATCTGCCCCCGTTCTTTTT                                      |
| polyT_17 | TTTTTTCAGGGTTATTGTGCGGGGAAAAAATCGACGCTCAAGTCAGAGGCGTTGCTGGCGGATAC |
| polyT_18 | TTTTTCTTCGGAAAAAGCTCCTAGAAGGACAGTATTTTTT                          |
| polyT_19 | AACGTTCTTCGGGTGGTTAATTGTCAGGTAGGCGGTGCTACAGTTTTT                  |
| polyT_20 | TTTTTGCAGTGTTATCAAAAGCAGCTTTTT                                    |
| polyT_21 | TTTTTAAACAAACCACCTATAGCTCTTGATCCGGCTTTTT                          |
| polyT_22 | TGCCGGGGCCAGGGCAGGGCCACTGGTAACAGGATTTTT                           |
| polyT_23 | CTGTCTATGACAGTTTTCTCTCTGTACTGGGCATAATGCCAGGCGGGCCATTTTT           |
| polyT_24 | TTTTTAGGCACCTATCAAGTAAGTTGGCCTTTTT                                |
| polyT_25 | TTTTTTTTTTGTTGCGGTAACATTTTT                                       |
| polyT_26 | ACCAATGCCGTCAATCCATAGGCTCCGCCCCCTGTTTTT                           |
| Loop_1   | AAGGAACCCCTAGTGATGGAGTTGGCCACTCCCTCT                              |

#### 2.2.5.4 sc\_EGFP5 16HB\_2

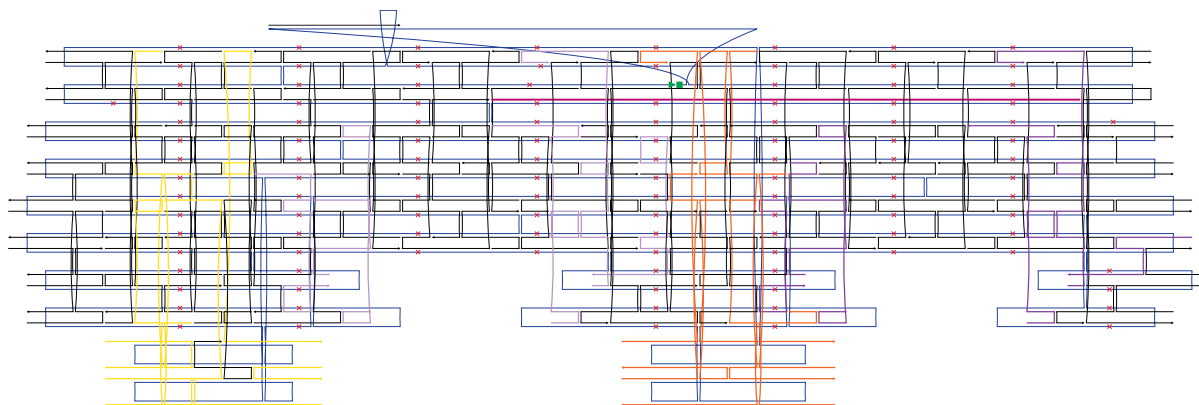

**Fig. S36 | Scaffold routing and staple design for sc\_EGFP5 16HB\_2.** Scaffold routing is shown in blue, staples are given in black, breakpoint for addition of sequence is marked by a green square (5') and arrow (3'). Long 154-mer 'primer' sequence at the promoter (5') region is given in pink. Protrusions 1 and 2 are shown in yellow and orange respectively, recess' 1 and 2 are given in light and dark purple, respectively. Design was prepared using caDNAo v0.1.

**Table S23 | Individual staple sequences for sc\_EGFP5 16HB\_2.**

| Name   | Sequence 5' – 3'                                       |
|--------|--------------------------------------------------------|
| core_1 | AGAAGATCCTTTGATGGTCATGCACGCTCAATTGTTGGGCAA             |
| core_2 | TTGCAAGCAGCAGATTACGCGCATCGACGCTTGTTCGCGCAGT            |
| core_3 | TTTTTCCGTTTCAGCCCGACTCGACCAGGATGGGCACCTTTTT            |
| core_4 | TTTTTGAACGAAAACCTATATGAGTAAATTTTT                      |
| core_5 | GGAAGCGTAGATAAGTAGCATGGCGGGTTAATTGGAAGGAAACGCACACCAGGG |
| core_6 | TTTAAATTAATAAAGGATCTTCACCGAAAAAAA                      |
| core_7 | CCCCCTGAGAGGTGGCGAAACAGGTTTTTTGTGACTGGTG               |

|         |                                                                  |
|---------|------------------------------------------------------------------|
| core_8  | CGCGTTGCGGCGTTTCCCCCTGGACGGCAAAC                                 |
| core_9  | AAGGCCAGGAACCGTAAAAAGGCGACCTCCCTTGTAACCACACCTAC                  |
| core_10 | GGTACGTGGCGCTTTTCTCATAGCCTTATCGC                                 |
| core_11 | GAATTCCGATCTTCCCTAGAGCATCAAACCTCCGGATGTCAGCGCGGGTGATCTTAC        |
| core_12 | TTAAGGGCCTCAGTTCGGTGTAGGATCGTCTT                                 |
| core_13 | ATTACTATTAATAACTAGCTAGCCTTGGAAAGCCTGGACAGAAGATG                  |
| core_14 | TTTTTCTTGGTCTGACAGTTACCAATGCTTAAATCAATCAGTCTATTGTGCTTTG          |
| core_15 | AGGCACCTATCTCAGCGATCTGTCTAGATCCTAAGTAGTTCATTGCTCTATTGTCGGTAACCA  |
| core_16 | TATTTGCCACGCTCACCGGCTCGATGAGTAGGGTCAAGGAATTGTTCAAAGGG            |
| core_17 | TTCCATAGTTGCCTGACTCCCGGCTCCGCGACGGTCTCACGACCCCTGCCCAAAGAATA      |
| core_18 | CGTCGTGTGGCCCCAGTGCTGCGAAAGCGA                                   |
| core_19 | CATATATGGGCTATTTTTTTTTTTGAACCTAATGACCCACGCCCA                    |
| core_20 | GCCAGCCGAGCCGGCACAACAGATGAAAGGACTGGCCCACTACGTGAA                 |
| core_21 | TTTTTCCAAAACCGCATCACCATGGTGCTCATCGCCGAT                          |
| core_22 | TTTTTCTGCACTTTATCCGCCTCCTAAAGTATCACGTTAAGGGATTTT                 |
| core_23 | CAGCTCTGTTACCATCTAGATAACTACGATAC                                 |
| core_24 | CGCCATTGCCAGCAATCTCCTGTTCCGACCCCTTCGGAGCCCGGCG                   |
| core_25 | ACGACATTTTCATTAACACCTGTCCGCCTTTCT                                |
| core_26 | CATTGACCGATGTTATCCAGAGGTTGATTGGATCCAATGCCAAGTGGTGGAGA            |
| core_27 | GTCAATGGAGGAAAGTCCCATAAGGTCATGTATTTTGTA                          |
| core_28 | CCGCTATCCGTAATTGTGGGCTGTGTGCACGAACCCCTTTTT                       |
| core_29 | CAGTGCCACTAAACCATTTTAAAGTCCCGGAAAGGAGCTGACAGGGGAGGGCCTTATATA     |
| core_30 | ACCTGTCACCGTACGCTTGTGAATGCCCAACCAAGTGGGGGTTGATATGATA             |
| core_31 | CCCAGTTTTGAAGTCGTTTTGTTAATTCCTTTTTCAATATTATTGAAGCAAAAACATCAGCTCG |
| core_32 | CTCTGTCTTACCGGATTACCTAATTAAGGGTGAGCAAAAGTGCCTCAA                 |
| core_33 | GGCGGCTCCCGTTAGTGGTCTTGTACAGCTCGTCCATGCCGAGGTAATAG               |
| core_34 | CAGCTCCTCACGAGGGCAGATGAAGCGGCTGAAGCACTGCACCTTTTT                 |
| core_35 | TTTTTACCCCGGTGAATTGATGACTGTTTTT                                  |
| core_36 | TTTTTCCCAACGATTATCTACGTAGCTTTTT                                  |
| core_37 | GCAAAAACGTTGGTGTAGATTATCAAAAATGAAGTTTTAATCAGTGTAACCA             |
| core_38 | TAAGATGCTGCGCAACTCAAGTCACGAGCATCACAAAA                           |
| core_39 | AGTACTCTAAATCAACCCACCCCCAGAAATTTCT                               |
| core_40 | CATTCTGAAAACCCCGCTGGTAGCGGTGGTACTATAA                            |
| core_41 | GAATAGTGTATGCGGACCAATACCCAGG                                     |
| core_42 | TCAATACTTAAATTATGCCCTGGAAGGCCCTGACAACGGGCCA                      |
| core_43 | TCATTCATTCACTGGCAGCAGCCACTGGTAACCCCTTCGCCTATCATCCCGTTGATGCCG     |
| core_44 | GGAAAACGTTCTTCGGGGCGGCCAGAGAAAGGTAGGTAT                          |
| core_45 | GGACACGCGAGTCCAACCCGTAAGACACGATCACGCTGCAAAGT                     |
| core_46 | TGAAGTTGTGGCCGTCCGTAGGGTGCCT                                     |
| core_47 | GGCCGAAATCGGCAAAATCCCTTAAACCAAGTTACCTGCCAGATACCATGGCGTTTTTCCATA  |
| core_48 | ATCAGCTCATTTTTTACGACCGAGCTCCTTAATCGTGCGC                         |
| core_49 | TGGCATCGCCCTCGCCCTCAAACCTCTCAAGCTTGTAGTTGCCGTGCGCGTCT            |
| core_50 | C TTCAGGGTCAAGCTTGTTACGTCGCTCACCATCTCCAAGC                       |
| core_51 | TTTTTCAAGCTTGCCGGTGGTGTGGGCCAGGGCACGGGTTTTT                      |
| core_52 | TTTTTCATGCTCTAGGAACCTAATCAATTTTT                                 |
| core_53 | TCGGGAATGTATGGCTAGTTACATCGGGGTCTGACGCTCAGTGTTTTT                 |
| core_54 | AACTCGAAGGGCGAGATGATTTCCCGAC                                     |
| core_55 | CTCGAATTTTACCTTGATTTTTGGTAATGCCAGGCGGGCCATTTACC                  |
| core_56 | ACCTTCTCCGCGGGGCAAGGCAGGCGGGCTGGATTAACACCACGGAAGGCACATGCCTG      |
| core_57 | TTAGGAAAGGACAGTGCTTGTGTAACCTCTGTTTTCTGT                          |
| core_58 | TGTGGCTGCCAGTTGAAAATGCCGCAAAAATCATACTC                           |
| core_59 | CCATGATAGAGTTGTTCTGCAATAGGGGGCTACTTGGCCAGCGTAT                   |
| core_60 | GTGGCGGATCTTGAAGTCACCTCGGTAAGACC                                 |
| core_61 | TTTTTAGATCTCGAAGACAATCCAGTTTTT                                   |
| core_62 | GGCCGACGGAAGGGCCGAGCGCAGAAGTGGTCTTTTT                            |
| core_63 | GCAGGCCAAGGGACGTAGCAGAAGGACGTCCAGCCAAGGGCTGGCA                   |
| core_64 | GTGGTGGCTCAGACAATGCGATGCATAGAATGTTGATACT                         |
| core_65 | ATAGTTAATCTTCTGCATAAAGAAGCGTTTTCTGGGTGAGTCCCCGAA                 |
| core_66 | GAATACCATGAAAGCCATACGGGAAGCAATCAACTCCTTGTGCGGATGCGGTT            |
| core_67 | GCTTATTACGGCGAGCTGCACGCTGCTTGAACCTGTGG                           |
| core_68 | GAGGGCCGCGGGAAGGAAGGTCCCCAGATTTGCTAGAGT                          |
| core_69 | AGCATGATGCGTAAAAGGAGCAACGTCATTGA                                 |
| core_70 | TTTTTCGTTGGGGTCTTTTTGTCCGGTTTTT                                  |
| core_71 | TTTTTTGGCAACACAGGCGAGCCGCGCAGGCGGAAGA                            |
| core_72 | TCCAGCAGGGTGGTGGGCATGGTCCGGGTA                                   |
| core_73 | CGAAAAACGGGAGCCCCACACCTAAGGAGCGGCTCCTCCGATCGTTCATGGTTA           |
| core_74 | TTTTTCCGTAGGTGAGACCTATGATCGCGCTTTTTT                             |
| core_75 | TTTTTGTTTTTTGGGGTTCGAGCCATCCCGATCCTTAACTAGAAGGCACAGTCCGAGGCTTTTT |
| core_76 | GTGCCGTACAATGCGCCATGCTACTCAAGGCGTCATTCAGCTCCGGTTTTTTTT           |

|             |                                                                                                                                                                    |
|-------------|--------------------------------------------------------------------------------------------------------------------------------------------------------------------|
| core_77     | ACCCTAAAGCTCTATCGTCCCGACGGGGGAGGCCGGAAATCAGCAA                                                                                                                     |
| core_78     | CCGGTGTAGCGGTCAAGTGTGTACGTGGACTCCTCCCCGAGTGGCTAATAGTTTCGCGTGAC                                                                                                     |
| core_79     | AAGGAACCCCTAGTGATGGAGTTGGCCACTCCCTCT                                                                                                                               |
| core_80     | CAGTTTACCGTAAATACTCCACCCATTGACGTCAATGGAAAGTCCCTATTGGCGTTACTATGGGAACAT<br>ACGTCAATTATTGACGTCAATGGGCGGGGTCTGTTGGGCGGTGAGCCAGGCCGGCCATTACCGTAAG<br>TTATGTAACGCGGAACTC |
| rec1_1      | CGACAAGTGGGGCGTAGACGTCCACATAACAAAGGCATTAAGCGTCA                                                                                                                    |
| rec1_2      | CTCTCATGCCATCCGCGCTGCGTTCCCAATCCAACGCAGTGCCCAACA                                                                                                                   |
| rec1_3      | GCAGCTGGCAATAGGGAGGGGAATGATACCAGGATCT                                                                                                                              |
| rec1_4      | CCACGTTGTAGTTGCTCCTCTATTGGTTTGTCTTTAAAGAGTTGGTAGCTCTTGATCAGCTCCC                                                                                                   |
| rec1_5      | ATTAAGATCCAGTTTGACCGAGATAGGGTTG                                                                                                                                    |
| rec1_6      | TTGAATAACGGGAATAAATGTTGCCGTAACCAACGCCTACCACTTGTACTGCCAAGTGGG                                                                                                       |
| rec2_1      | TGTAAGCTGTGCGCTTTCACCGACAGCAACCAG                                                                                                                                  |
| rec2_2      | TTTTTCAGCAGCACGGGGCCGGGTAGTGGGCTCAGGGCGGACTGGAGTG                                                                                                                  |
| rec2_3      | AGAAAAGTCAATCTTTCACAACTGGGCATGCCAAAA                                                                                                                               |
| rec2_4      | CGAACGGGGGTGTTAGCCTTCCGCCCTTCCGTCCAGCCGCTGCGCCTTATCCGGTAACTTCGTTCCG                                                                                                |
| rec2_5      | CTTCAGCAAACCCACGCTGTTGAGATCCAGAAAAGTGCAATAGGTG                                                                                                                     |
| rec2_6      | TCATGTGGCGGACTTGCCGTGACGTCTGCTGGGAGTCAAACGATGACTAATACGTAGATGTAC                                                                                                    |
| pro1_pass_1 | CTTTCTAGATCCCCCTAAGTTGGTTTTT                                                                                                                                       |
| pro1_pass_2 | ACAGGCATGCGGTTAGGGATCTCATGGCAGCACTGCATAATTCITTTTT                                                                                                                  |
| pro1_pass_3 | TCGCCCTTAATTAAGGAAGCACTAGAACGTGGTTTTT                                                                                                                              |
| pro1_pass_4 | TTTTCCGCAGTGTATCACTGTCAGAAGATGTTGTTAATGTT                                                                                                                          |
| pro1_pass_5 | TTTTTCTTACTGCTTGGCGCTAGGGCTTTTT                                                                                                                                    |
| pro1_pass_6 | TTTTTCGAGAAAGGAAGGGAAAAGCCGGCAATCGGA                                                                                                                               |
| pro1_pass_7 | TTTTTGCTGGCAAATTTAGAGCTTGACGGGGAGAAAAGCGAGCCGCGCT                                                                                                                  |
| pro2_pass_1 | TTTGGTATACATAGCACGGTGCTAATATTTGAATGTATTTAGAAAATTTTT                                                                                                                |
| pro2_pass_2 | AGAGTCTTACCGCGCCCTGCGCTCCACTAGAAGGACAGTAAGGATTAGCAGAGTTTTT                                                                                                         |
| pro2_pass_3 | TTTGTAAAGCGGATACCAGAGTCTTGAAGTGGTGGCTTTTT                                                                                                                          |
| pro2_pass_4 | GTAAATATAAGTGCCAGGGTTCCGCGCACATTCATTTATCAGGGTTTTTT                                                                                                                 |
| pro2_pass_5 | TTTTTCTAAGTACGGCTATGCTGAAGCCAGTTATGCCGCT                                                                                                                           |
| pro2_pass_6 | TTTTTCGAGGTATGTAGGGAACTTT                                                                                                                                          |
| pro2_pass_7 | TTTTTTATTGTCTCATGAAATTCGCGGGGATAAT                                                                                                                                 |
| pro2_pass_8 | TTTTTAATAAACAAATAGCCTAAATTTTCGATGTTCTTTTTAC                                                                                                                        |
| pro1_x8_1   | CTTTCTAGATCCCCCTAAGTTGGAAGCATT                                                                                                                                     |
| pro1_x8_2   | ACAGGCATGCGGTTAGGGATCTCATGGCAGCACTGCATAATTCITTCGTCA                                                                                                                |
| pro1_x8_3   | TCGCCCTTAATTAAGGAAGCACTAGAACGTGGCGAGTCCC                                                                                                                           |
| pro1_x8_4   | TATTATTGCCGAGTGTATCACTGTCAGAAGATGTTGTTAATGTT                                                                                                                       |
| pro1_x8_5   | CTGTCTATTCTTACTGCTTGGCGCTAGGGCACCTGCC                                                                                                                              |
| pro1_x8_6   | CCTTAAGTACGAGAAAGGAAGGGAAAAGCCGGCAATCGGA                                                                                                                           |
| pro1_x8_7   | TGATACTTGCTGGCAAATTTAGAGCTTGACGGGGAGAAAAGCGAGCCGCGCT                                                                                                               |
| pro2_x8_1   | TTTGGTATACATAGCACGGTGCTAATATTTGAATGTATTTAGAAAACTGAGG                                                                                                               |
| pro2_x8_2   | AGAGTCTTACCGCGCCCTGCGCTCCACTAGAAGGACAGTAAGGATTAGCAGAGCTACGGCT                                                                                                      |
| pro2_x8_3   | TTTGTAAAGCGGATACCAGAGTCTTGAAGTGGTGGCAGTTTTTAA                                                                                                                      |
| pro2_x8_4   | GTAAATATAAGTGCCAGGGTTCCGCGCACATTCATTTATCAGGGTAATAGGTG                                                                                                              |
| pro2_x8_5   | AAAAATGACTAACTACGGCTATGCTGAAGCCAGTTATGCCGCT                                                                                                                        |
| pro2_x8_6   | TGGCCTAACGAGGTATGTAGGGAACTTT                                                                                                                                       |
| pro2_x8_7   | GTAAGACCTATTGTCTCATGAAATTCGCGGGGATAAT                                                                                                                              |
| pro2_x8_8   | CGTACATGAATAAACAAATAGCCTAAATTTTCGATGTTCTTTTTAC                                                                                                                     |
| pro1_x5_1   | CTTTCTAGATCCCCCTAAGTTGGAAGCA                                                                                                                                       |
| pro1_x5_2   | ACAGGCATGCGGTTAGGGATCTCATGGCAGCACTGCATAATTCITTCGT                                                                                                                  |
| pro1_x5_3   | TCGCCCTTAATTAAGGAAGCACTAGAACGTGGCGAGT                                                                                                                              |
| pro1_x5_4   | TATTGCCGAGTGTATCACTGTCAGAAGATGTTGTTAATGTT                                                                                                                          |
| pro1_x5_5   | TCTATTCTTACTGCTTGGCGCTAGGGCACCTG                                                                                                                                   |
| pro1_x5_6   | TAAGTACGAGAAAGGAAGGGAAAAGCCGGCAATCGGA                                                                                                                              |
| pro1_x5_7   | TACTTGCTGGCAAATTTAGAGCTTGACGGGGAGAAAAGCGAGCCGCGCT                                                                                                                  |
| pro2_x5_1   | TTTGGTATACATAGCACGGTGCTAATATTTGAATGTATTTAGAAAACTG                                                                                                                  |
| pro2_x5_2   | AGAGTCTTACCGCGCCCTGCGCTCCACTAGAAGGACAGTAAGGATTAGCAGAGCTACG                                                                                                         |
| pro2_x5_3   | TTTGTAAAGCGGATACCAGAGTCTTGAAGTGGTGGCAGTTTT                                                                                                                         |
| pro2_x5_4   | GTAAATATAAGTGCCAGGGTTCCGCGCACATTCATTTATCAGGGTAATAG                                                                                                                 |
| pro2_x5_5   | AAGTACTAACTACGGCTATGCTGAAGCCAGTTATGCCGCT                                                                                                                           |
| pro2_x5_6   | CCTAACGAGGTATGTAGGGAACTTT                                                                                                                                          |
| pro2_x5_7   | AGACCTATTGTCTCATGAAATTCGCGGGGATAAT                                                                                                                                 |
| pro2_x5_8   | ACATGAATAAACAAATAGCCTAAATTTTCGATGTTCTTTTTAC                                                                                                                        |

### 2.2.5.5 sc\_EGFP5 16HB\_3

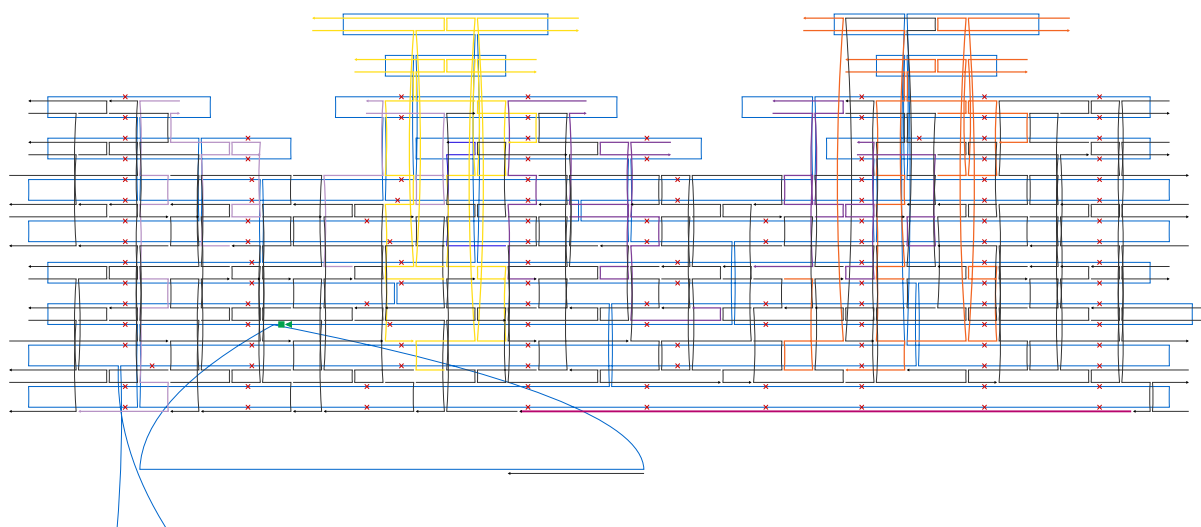

**Fig. S37 | Scaffold routing and staple design for sc\_EGFP5 16HB\_3.** Scaffold routing is shown in blue, staples are given in black, breakpoint for addition of sequence is marked by a green square (5') and arrow (3'). Long 154-mer 'primer' sequence at the promoter (5') region is given in pink. Protrusions 1 and 2 are shown in yellow and orange respectively, recess' 1 and 2 are given in light and dark purple, respectively. Design was prepared using caDNAo v0.1.

**Table S24 | Individual staple sequences for sc\_EGFP5 16HB\_3.**

| Name    | Sequence 5' – 3'                                                 |
|---------|------------------------------------------------------------------|
| core_1  | TTTTTAGGACCATAGTTGTA CTCCAGTTTTT                                 |
| core_2  | TTTTTCCGAGCGCATCCAGTCTATTATTTTT                                  |
| core_3  | AGAAGTGGCAGCCAGCCGGAAGGGTTTTT                                    |
| core_4  | TCCTGCACCGCGTGAGGCTACACTTCTTGAA                                  |
| core_5  | TTGATTGGATCCAAGCTTCTCTGAGGTCAGG                                  |
| core_6  | CGGCGGCGCGCTTCTCGTTGGGGTCTTTGCTCTCGGCCATGATGCCCTGAGTGGCA         |
| core_7  | GTGGATGTCAGTAAGAAGTGATCCTTGAAGTCGATATAGACTAGAAGG                 |
| core_8  | TTTTTGGAGAGAATTCAGGGTCAGTTTTT                                    |
| core_9  | TTTTTGCGCTCTGACAGGATTAGCAGTTTTT                                  |
| core_10 | CTGAAGCCACAGTATTTGGTATCTTTTTT                                    |
| core_11 | CCCGGTGACAGAAACGCAAGAGTCTTATTACTACCAGG                           |
| core_12 | TTTTTATTGTTGCCGGAAGCTAGAGTAAGTAGAATAAAC                          |
| core_13 | TTAATAGTATCGTGGTGTACGCTTCTATCAG                                  |
| core_14 | GCCCCAACAAAGGAGCTGACAGGTGATCACCT                                 |
| core_15 | CATACGGGAGAATCCAGGTGGCAGAGCCCC                                   |
| core_16 | CCTTGATGACGCGGAAAATGTTAATATCGGGACGGTCACGCTGCGCGTGCCTGGC          |
| core_17 | CGTTGTGGCTGTTGTGTGATCGGTACGAACTCCAGTTTTT                         |
| core_18 | GGTCATGAGGGTCTGATTACCGGAGGCGCTTTCTCATAGCTCACGCT                  |
| core_19 | TCAGCTCGCCAGGGTGCCTATACAGCTCCTCGCCCTTGCTCACCGCCGGACA             |
| core_20 | TTTTTCTTGTGCCCCAGGGGGGGAGTTTTT                                   |
| core_21 | TTTTTAGCGAGGTATGTAGGCGGTGCCCGCTCC                                |
| core_22 | TACAGAGTAGAAGGAGTTACCTTCGGAAAAAGAGTTGGACTTATCGTGGTGGC            |
| core_23 | GCAGATTATTGAGTCTACCTAATTAAGGGTGTAGCTAGC                          |
| core_24 | CGCTCAGGGGCTGTTGGCGTTTTTCCATAGGCTCCGCGTGACCC                     |
| core_25 | TGCTGCTTGTCTTGAAGAAGATTTAAAGCCGAAGGG                             |
| core_26 | CACGGGCACGCTGAACAGACCTCCCACCGTACACGCCTACTTGATTTTGTGGTGCACGTCCTCC |
| core_27 | GCTTGCCGGGTGCCAACCTTCCAGACACTACTGCTATTGTCTTCCCAATCCTCCACAGATG    |
| core_28 | GCCACTGGAGATAAGTAGCATGGCTAGAGCAT                                 |
| core_29 | GACCGCTAAGGCCAGGAACCGTAATGACCC                                   |
| core_30 | TTCAGCCCTTTGATCTGCGTTTTCTGGGTGACG                                |
| core_31 | TCCAAGCTTGAACGAAACTGATCGAATAAGGGTTAAATCGATTTAGAGCTTGACGGGGAAG    |
| core_32 | TCGTTGCGGTAGGTATCTCTCTGTTCCGACCCTAAAGTAACGTTAAG                  |
| core_33 | CTTGATACTACGTCAGAGGTGGCGAAACCCAGAAGTCGAAAACCGC                   |
| core_34 | CAGCTCGATTACGGTTCACTAAACCAGCTCTGACGTCAATGAGGGTGGGATGCGGT         |
| core_35 | TTTTTGGCGTAGGTGGCTTGCCTCAATGGGGCGGAGTTTTT                        |

|             |                                                                                                                                                                  |
|-------------|------------------------------------------------------------------------------------------------------------------------------------------------------------------|
| core_36     | CTACAGGCTTGCGCAACGTTGTTGTGGCAATCGGGAGGGAAAGCGGT                                                                                                                  |
| core_37     | AAGCGAAACCGATCGTCCCCTCGTATCTCAAGAAGATCC                                                                                                                          |
| core_38     | ACGTAGCACCGGCGAACTAAATTGTAAGCGTTCCAATAGCGATGACTAATACGTAGATGTACT                                                                                                  |
| core_39     | GCAGCAGGGCCGTCGCCGATGGCGGGCAG                                                                                                                                    |
| core_40     | CACAGTCGAGCATGCCTCAGACAATGCGATGTCATTGA                                                                                                                           |
| core_41     | TTTTTGGCAAACACCCCTTGCTGTCCTTTTTT                                                                                                                                 |
| core_42     | TTTTTAGCTCCGGATTAAGAACGTGTTTTT                                                                                                                                   |
| core_43     | GCGACACGTCCCAGCGCAAGCAATAGCATGATACAAAGGCAGGTGCGCT                                                                                                                |
| core_44     | GAATACTCATCACCATGGTACTCCCCCTGAGGTGTAGG                                                                                                                           |
| core_45     | ATACTCTGTGCCACCGTGGCGAGAAAGGAAGGAAGACCGCTGGA                                                                                                                     |
| core_46     | CAATATTATTGCCGTCCATGTGGTCGGGGTA                                                                                                                                  |
| core_47     | TTGAAGCATCCACGCGGAAAGTCCCATAAAGGTCATGTAAAATAAACGGTTATTG                                                                                                          |
| core_48     | AAGGCACATGTTGCGATGAACAGGCAACGCCTGGACACCTGTTTTT                                                                                                                   |
| core_49     | CATAATTCCATGATCCCGAGATAGGGCGATGGCCACTACGTGAACCGCCATTGGTGCAA                                                                                                      |
| core_50     | CACTCATGTTTTAAAAGTTAAGGGCGAATTCCGATCTCC                                                                                                                          |
| core_51     | AGTGTTATTAGCTCCTGCAAAATCAATCAAGTTTTTGGGGTTCGAGGT                                                                                                                 |
| core_52     | TTCAGCAGTTGAGATCCAGTTCGATGTAACAATATTTT                                                                                                                           |
| core_53     | CCATTGATCAACTGCCAGTGCCTCACGACCAACTTCTGGTGAGTCA                                                                                                                   |
| core_54     | GACTTGGATAATGCCAGGCGGGCCATTTACCGCAATTTCTCATTATT                                                                                                                  |
| core_55     | GGGGTGGACATTTATTAGAAAGGTCTCGAAG                                                                                                                                  |
| core_56     | CCCATTGCTTATATTTGTGGCCGTTTACG                                                                                                                                    |
| core_57     | AACAACTCGTCAATAGGGGGCGTACTTGGCAATAGAATGGGTCAAGGGCTGGCAA                                                                                                          |
| core_58     | TTTTTTGTTACGACATTTTGAACACTTGATGTGGG                                                                                                                              |
| core_59     | TTTTTCTGTGACATAGTGTATGCGTTTTT                                                                                                                                    |
| core_60     | TGGTGAGTATCCGTAAGATGCTTTTTTTT                                                                                                                                    |
| core_61     | ACTCAACCAGCAGCCACTGGTA                                                                                                                                           |
| core_62     | GGGTTAATCAGCACTGTTTTGTTTTCTGGCCCCAGTGCTG                                                                                                                         |
| core_63     | AGCAAAAGTTGGCCGCAAAAAGGGTAGATAACTACGATA                                                                                                                          |
| core_64     | GCCAGCAAGCGCCTTATCCGGTAACTATCGTCCGCGCAGA                                                                                                                         |
| core_65     | CGCCATATCGCCCTCGCCCTCATGGCGGC                                                                                                                                    |
| core_66     | TTTTTGACTCCAACGTCAAAGGGCGAAAAACCGCGTCTTGATCAAGACTTTAT                                                                                                            |
| core_67     | AAGCGAAAGTTCGGCGCACATTTCCGCAAGTA                                                                                                                                 |
| core_68     | GGTTGAGTGTTGAAGGCGTCAATCATGCC                                                                                                                                    |
| core_69     | CCTTATAAATCAAAAGCAGAACGTTATGGCATTAAACAACCCGG                                                                                                                     |
| core_70     | TTTTAACCAATAGGCACGTTCTAAGTAAG                                                                                                                                    |
| core_71     | TCCGTTAAATTTTTTTTACCGCTTCTTTTACCGGTTGC                                                                                                                           |
| core_72     | CCCGAAAATCCTTTTTTTGAGGGCAGCGTATCCACATAGCGTAAAAGGTCTTGATG                                                                                                         |
| core_73     | TTTTTGCCCCACCCACCCCCAGATATGATAAGTCCCG                                                                                                                            |
| core_74     | TTTTTCGACCGAGTTGCTCTTGCCGAGTCCACTTTCCCAACTGGTATGGCTTATTCTTTTT                                                                                                    |
| core_75     | AATACCGCGCCACATAGAATAGACCCCATGTT                                                                                                                                 |
| core_76     | TGCTCATCATTGGAACGAAATCGTCCGGTCT                                                                                                                                  |
| core_77     | TCGGGGCGCGTAATTGATTACTATTAATAAC                                                                                                                                  |
| core_78     | AAAACCTCAAGGATCGTTAAATCAAGGCAAA                                                                                                                                  |
| core_79     | CTGGGCAATCCCCAGGATCTCTCCTTAAACCTGTCTTGTAACGCGGCTGAAACCGCTA                                                                                                       |
| core_80     | CATATATGGGCTATGAACTAAAAGGCTTTCACCATTCTACGGATTATCAAAAAATG                                                                                                         |
| core_81     | TTTTTGCCAAGTACTTTTTT                                                                                                                                             |
| core_82     | AAGGAACCCCTAGTGATGGAGTTGGCCACTCCCTCT                                                                                                                             |
| core_96     | CAGTTTACCCTAAACTCCACCCATTGACGTCAATGGAAAGTCCCTATTGGCGTTACTATGGGAACA<br>TAGCTCATTATTGACGTCAATGGGCGGGGTCGTTGGGCGGTCAGCCAGGCGGGCCATTTACCGTA<br>AGTTATGTAACGCGGAACCTC |
| rec1_1      | GATTTATCAGCTTCGCCAGCAATGATAGCGAGTTATCTTACTGTACGGGATGGCTACGTCAAGTCATT<br>CTGAGA                                                                                   |
| rec1_2      | GACTCTAGATCCTTTTAAATAAAAGGATAGGATTTA                                                                                                                             |
| rec1_3      | CTTACCAGCAAGCATGGTAGCTGATCCG                                                                                                                                     |
| rec1_4      | TAAGACACGTAGCTCTGGTGGTTTCTAACTACCCC                                                                                                                              |
| rec1_5      | GTGCACGAACCCCCCGGAAGCGTTACCTGTC                                                                                                                                  |
| rec1_6      | GTCCCGGACAGTGGGGGTTGCGTCTTCGT                                                                                                                                    |
| rec2_1      | ACAGTTACCAATGCTTAATCTGAAAGCGGATTTTAAAAAGG                                                                                                                        |
| rec2_2      | AAATTTTGTAAAGGCGCGGGAGCAACATCCGCGGGAAGGAAGGT                                                                                                                     |
| rec2_3      | TGGAAGCTCCGACTTGAGACAGGACGAGCATCACAAAAATCGACGCTGTACTGCC                                                                                                          |
| rec2_4      | TTGGCCAGGATGGGCACCACTCGCCGTCGTGGTCAC                                                                                                                             |
| rec2_5      | AAATTCGGGCATGGCGCTCGTGGCTCAGTTCTATAAAGAT                                                                                                                         |
| rec2_6      | AGCACTGCTTACCTCTCCAGAGGCAGCACGGAGTTAAGAATA                                                                                                                       |
| rec2_7      | GAAGGACGGAAATGTTCTGGACGTAGCCCTCTATAT                                                                                                                             |
| rec2_8      | AGAGCCGTCTCATGCTCGAACACGCGGTTCTCG                                                                                                                                |
| pro1_pass_1 | TTTTTGATGATTTCCCCGACAACACCTAAAGGACACAGGCATGCCGCA                                                                                                                 |
| pro1_pass_2 | TTTTTGTCAGCAGCGGGCAAGGCAAGGGGAGCCGTAA                                                                                                                            |
| pro1_pass_3 | TTTTTACTCCTCAGGAGAAAAAGTGAGGCAAGTTTTTAAATCAATCTGCCCG                                                                                                             |
| pro1_pass_4 | TTTTTACCACGCTGTCTATAGCAAACCTTACCTGTAGCAAAAACAGG                                                                                                                  |

|             |                                                                      |
|-------------|----------------------------------------------------------------------|
| pro1_pass_5 | ACCTATCTCAGCGATCCAGTTGCCAGCAACCACAGTGCATTTTT                         |
| pro1_pass_6 | CAATAGGGAGGCGGCGTTGTCAGTGCCCAACAGCCGAGCCCTTTTTT                      |
| pro1_pass_7 | CGCCGTGGTACAAGGATAAAGAGACTGACAACGGGCCACATTTTT                        |
| pro1_pass_8 | AGTCTATTAGCACTAAATCGGAACCCACGGAAATGAGTTTCGAGCAGCCAAGGAAAGGACTTTTT    |
| pro2_pass_1 | TTTTTTACGTAGCCATGCTCTAGGAGTCCCCAGGCAGAACAGTGG                        |
| pro2_pass_2 | TTTTTACCACACCCGCGCGCTTGAGGCCGCAAGTGTAGTGAATGTATTTAGAA                |
| pro2_pass_3 | TTTTTTGTTGTGGCTGCTTGAGGGCGGCTCGTCCATGCCGAGCCAATAGG                   |
| pro2_pass_4 | TTTTTGTGGTTCGGGTGGTTGTGGGTGTTTCGTGTGCCAGCGGATA                       |
| pro2_pass_5 | TTGTACAGACTGGGTGCTCAGGTACGAGCTGCGAAGTTCATGCTGGTATTTTT                |
| pro2_pass_6 | CCGTTCTTCGGATCTTACGCTGCCGTCTCGATTTTT                                 |
| pro2_pass_7 | TTTATCAGAAATAGGGGGAGCGGGCGCTAGGGAACTTTTT                             |
| pro2_pass_8 | ATTCGCCCTTAACTCGAAGATCCTTTAAGGCAATGCGCCATGCTACTTATCTTTTT             |
| pro1_x8_1   | GCAAACAGGATGATTTCCCGACAACACCTAAAGGACACAGGCATGCCGCA                   |
| pro1_x8_2   | GCCGAGCCGTCCAGCAGCGGGCAAGGCAGGGGGAGCCGTAA                            |
| pro1_x8_3   | GGGCGACAACCTCCTCAGGAGAAAAAGTGAGGCAAGTTTTAAATCAATCTGCCGC              |
| pro1_x8_4   | GGAACAAGCACCACGCTGTCTATAGCAAACCTTCACCTGTAGCAAAAAACAGG                |
| pro1_x8_5   | ACCTATCTCAGCGATCCAGTTGCCAGCAACCACAGTGAAGTCCACT                       |
| pro1_x8_6   | CAATAGGGAGGCGGCGTTGTCAGTGCCCAACAGCCGAGCCCTCCTGTCCA                   |
| pro1_x8_7   | CGCCGTGGTACAAGGATAAAGAGACTGACAACGGGCCACACGGAAATG                     |
| pro1_x8_8   | AGTCTATTAGCACTAAATCGGAACCCACGGAAATGAGTTTCGAGCAGCCAAGGAAAGGACAGTGCACA |
| pro2_x8_1   | ATCCCGGCTACGTAGCCATGCTCTAGGAGTCCCCAGGCAGAACAGTGG                     |
| pro2_x8_2   | GATTTATACACCACACCCGCGCGCTTGAGGCCGCAAGTGTAGTGAATGTATTTAGAA            |
| pro2_x8_3   | AAGAAGTCTGTTGTGGCTGCTTGAGGGCGGCTCGTCCATGCCGAGCCAATAGG                |
| pro2_x8_4   | CGTGACCGTGGTTCGGGTGGTTGTGGGTGTTTCGTGTGCCAGCGGATA                     |
| pro2_x8_5   | TTGTACAGACTGGGTGCTCAGGTACGAGCTGCGAAGTTCATGCTGGTACAACCTGAT            |
| pro2_x8_6   | CCGTTCTTCGGATCTTACGCTGCCGTCTCGAGTGTCTGCT                             |
| pro2_x8_7   | TTTATCAGAAATAGGGGGAGCGGGCGCTAGGGAACCAAGGAGG                          |
| pro2_x8_8   | ATTCGCCCTTAACTCGAAGATCCTTTAAGGCAATGCGCCATGCTACTTATCGGCGGTCA          |
| pro1_x5_1   | AACACGATGATTTCCCGACAACACCTAAAGGACACAGGCATGCCGCA                      |
| pro1_x5_2   | GAGCCGTCCAGCAGCGGGCAAGGCAGGGGGAGCCGTAA                               |
| pro1_x5_3   | CGACAACCTCCTCAGGAGAAAAAGTGAGGCAAGTTTTAAATCAATCTGCCGC                 |
| pro1_x5_4   | ACAAGCACCACGCTGTCTATAGCAAACCTTCACCTGTAGCAAAAAACAGG                   |
| pro1_x5_5   | ACCTATCTCAGCGATCCAGTTGCCAGCAACCACAGTGAAGTCC                          |
| pro1_x5_6   | CAATAGGGAGGCGGCGTTGTCAGTGCCCAACAGCCGAGCCCTCCTGT                      |
| pro1_x5_7   | CGCCGTGGTACAAGGATAAAGAGACTGACAACGGGCCACACGGAA                        |
| pro1_x5_8   | AGTCTATTAGCACTAAATCGGAACCCACGGAAATGAGTTTCGAGCAGCCAAGGAAAGGACAGTGC    |
| pro2_x5_1   | CCGGCTACGTAGCCATGCTCTAGGAGTCCCCAGGCAGAACAGTGG                        |
| pro2_x5_2   | TTATACACCACACCCGCGCGCTTGAGGCCGCAAGTGTAGTGAATGTATTTAGAA               |
| pro2_x5_3   | AAGTCTGTTGTGGCTGCTTGAGGGCGGCTCGTCCATGCCGAGCCAATAGG                   |
| pro2_x5_4   | GCACCGTGGTTCGGGTGGTTGTGGGTGTTTCGTGTGCCAGCGGATA                       |
| pro2_x5_5   | TTGTACAGACTGGGTGCTCAGGTACGAGCTGCGAAGTTCATGCTGGTACAACCT               |
| pro2_x5_6   | CCGTTCTTCGGATCTTACGCTGCCGTCTCGAGTGTCT                                |
| pro2_x5_7   | TTTATCAGAAATAGGGGGAGCGGGCGCTAGGGAACCAAGG                             |
| pro2_x5_8   | ATTCGCCCTTAACTCGAAGATCCTTTAAGGCAATGCGCCATGCTACTTATCGGCGG             |

### 2.2.5.6 sc\_EGFP5 16HB\_4

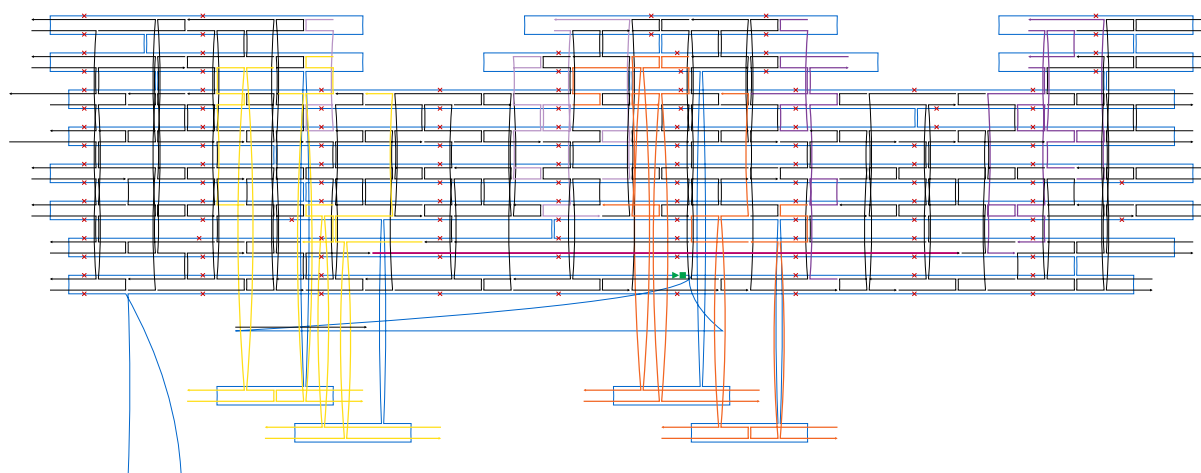

**Fig. S38 | Scaffold routing and staple design for sc\_EGFP5 16HB\_4.** Scaffold routing is shown in blue, staples are given in black, breakpoint for addition of sequence is marked by a green square (5') and arrow (3'). Long 154-mer 'primer' sequence at the promoter (5') region is given in pink. Protrusions 1 and 2 are shown in yellow and orange respectively, recess' 1 and 2 are given in light and dark purple, respectively. Design was prepared using caDNAo v0.1.

**Table S25 | Individual staple sequences for sc\_EGFP5 16HB\_4.**

| Name    | Sequence 5' – 3'                                        |
|---------|---------------------------------------------------------|
| core_1  | TTTTTATCACCGTAATCAAGTGCCCACTACGTGAACCTTTTT              |
| core_2  | ATACTTACGTCCTCGAGGTCGGCGCGATGGGGGTGTTCTGGTGACACAC       |
| core_3  | GTCAGCTTTTGTAAATCAAGGAGCAACATAGTCACGCCAGCGTCAG          |
| core_4  | TTTTTTTTCTGTGACTGGTGGCCATCCGTAAGATGCTTTTT               |
| core_5  | CTCACGCTGTAGGTATCTCAGTTTTGCTGGCCGTTTGGTGGGAAGCT         |
| core_6  | TTTTTAAGGCAAAGTGGGCGTTTCTTTTT                           |
| core_7  | GTCGTTGCTCCAAGCTGGGCTGAGCAAAGCCAACGATTCGCCTC            |
| core_8  | TTTTTCGGGGCCGTCGCAGCTGCATTTTTTTTTTTTTTTTT               |
| core_9  | GCCACAACATCCACATCTGCTTGGCAGATGACTGTCTCGTACTTTCATCCCTTCG |
| core_10 | GGCAACAGGAAGGTTTTTCAATATTATT                            |
| core_11 | CTACTCACTTCCAGGCCCTCGACGGGCATGCGGTTAGC                  |
| core_12 | CACCACACAATCAAAGAATAGACTTAACCAAATGGTTATTATGCGGC         |
| core_13 | GATGATTAACAGCCGCGATGAGTTCGCCAATCCCCGTCTATTA             |
| core_14 | TAGCGTAACAGAGGTTGATTGGATCGAGAGTGCCAGCGTT                |
| core_15 | CCGCCGCGCTTAATGTTAATTAACACTTGGTCGCTCACCGGCTCCAG         |
| core_16 | TTTTGTCTATCAGGGCGATGCAAAGGGCGAAAAACCTTTTT               |
| core_17 | TTTTACTATTAAGAACGTGGACTTCGTTT                           |
| core_18 | TTTTTCGCTGCCCTGCCAGTGCTTTTT                             |
| core_19 | TGTTGTGGCCAAGGTAGTGGTTGTCGGGCAGCAGCATTTTT               |
| core_20 | ACGTTGTGGCTGTTGTTGGGCCAGTGGTGTCACTCGTGCA                |
| core_21 | CTCCAGCTAGGGAGGGGGAAAGCGAAAGTCCCCCATTGA                 |
| core_22 | CGCGGGAAGGCAAACACGTGCTGTGCATGCGCAGAAGAGTGGAA            |
| core_23 | ACAAATTGCCGTAGGAAGTTCCTTAACAACCAGC                      |
| core_24 | TAAGAATACGGATCTTGTGGCATCTAGGTGCCCTCACCAT                |
| core_25 | CAAACACAGTTCACTACTGTCTTGGACGTCAACCGACAGGACTATAAA        |
| core_26 | GGCAATGCGGGTCTTGTAGTTGCCGTGATCTGACCCACTGACAG            |
| core_27 | TTTAGAGCTTGACGGTTTTTGGGATTGTAAGCGTTAATTTTTTTTT          |
| core_28 | ACTTCAGGCACCACCCATCCCGCGGCGGTACGAACTC                   |
| core_29 | GGGTTGAGGTAGCGGTGGGCGCTAGGGCGCTCCAACGTGGAAGCC           |
| core_30 | GGACTGGGTGCTCGTCAATCTTTCCAGCAGGACCGTCCAGCTCGACC         |
| core_31 | AATCGGCAAACCTTGAAGAAGATCAGAAGTATCAATACGGTAAGACA         |
| core_32 | TTTTTTGTTAAAATTCAACAAGAGTCTTTTT                         |
| core_33 | TTTTTTTTTTTTTTTTTGAACCTCCTGTGGAGAGATTTTT                |
| core_34 | TCTGGGTCATCTTTTGTGGCCATCACAAATGTAAGTCCCAAGTGGG          |
| core_35 | CCGCAAATAACCCACGCTCGTGTTTTTCCATAGGCTCCGCCCCCC           |
| core_36 | AAAGGGAAGGTTGGTCACGAGGGAGTTGTAAGAGTAACGTCAATGTACTGC     |



|             |                                                                                                                                                                   |
|-------------|-------------------------------------------------------------------------------------------------------------------------------------------------------------------|
| core_37     | ATGTTGAGATCTTACCGGTTCCGCCAGGAACCGTAAAA                                                                                                                            |
| core_38     | TCATGAGCATAGCATCCTTCGTAAGTAGCATGGCGGGTTAATCATGCGCCTT                                                                                                              |
| core_39     | GAAAAATCCCGGCGAGTTGGCTCCGATCTTCCTAG                                                                                                                               |
| core_40     | GCCCTTGATCAGAGCGAAACTAGGGGGCGTACTTG                                                                                                                               |
| core_41     | GGCGAAAACCTCTCAAGATACTCATTAGCGGCTCGCGCAGAGAAAGGAC                                                                                                                 |
| core_42     | GAAAACGATCCCCCTAATTAAGGGTGAGCAAAGGCCTGTGCACG                                                                                                                      |
| core_43     | AAAGTGCTCATCATTGGAAGCATTGAAGAAGTACAGATGGAAGGCACG                                                                                                                  |
| core_44     | TTTTTTTTGCTCAGGGCGACACGCTTTTT                                                                                                                                     |
| core_45     | AATAGTGGGCAGCAACTATTAATACTAATGACCCCGTTCTGCTGA                                                                                                                     |
| core_46     | TTCCGACCGGCGCGCCGCTGGACAGTGGCCGCTCCTCGCCG                                                                                                                         |
| core_47     | CCACTGGTAACAGATTAGCAGAAATTGATTCTGCATAAGGGCTTAC                                                                                                                    |
| core_48     | CTGCCAAGTCTGCTTATATAGACCCCAACCAGGCCGTTCT                                                                                                                          |
| core_49     | CAGTTTGGGCGTAAACTGTCATAGTACTCATGTAGGCGTTTTT                                                                                                                       |
| core_50     | ATCGTTGTGGTGCCTTATTTGAATGTATTTA                                                                                                                                   |
| core_51     | GCCCTCGCTTACGTCGCCATGTGATCGCGCTTCTCGTTGGGGTCTTTTT                                                                                                                 |
| core_52     | GGAAGCGTGGCGCTTTGACGAGCATTGCTACTAGTTTGCTGATATAGAGCTGACA                                                                                                           |
| core_53     | CGACTTATCGCCACTAGGGCGAACGAGTGTATACCGCGCCTTATA                                                                                                                     |
| core_54     | AGGGTGTGGTCAAGGCTGGCAACTAGAAGGAGGCCGCTTATTGTC                                                                                                                     |
| core_55     | GTAGTTCCGCAGTTAAAGGCATCGGGCACGGGACAGGAAGGCAAAATG                                                                                                                  |
| core_56     | TTGTTGCCATGGCTTCTGATAGGCATAAGGGCGACACGGAA                                                                                                                         |
| core_57     | CTTCATGTGTTACATGTTCTTCGGAACCCCGTTCCAGCCCGACCCG                                                                                                                    |
| core_58     | TAACTACGGGCCTAACTACGGCTACACTTTTT                                                                                                                                  |
| core_59     | TTTTTCTCCCGTCGTGTAGAATCCATAGTTGCCTGATTTTT                                                                                                                         |
| core_60     | TTTTTTCACGACCAACTATAATGCTTTTT                                                                                                                                     |
| core_61     | TCCCACCACAAGCCCTACACTTGAAATCGAC                                                                                                                                   |
| core_62     | GGGGTGGAGACTTGGAGTGGCAATTGTGCCCC                                                                                                                                  |
| core_63     | ACGGGGTGCAGGGCAAGTCGATGCCAGCCAAGATCCAGGT                                                                                                                          |
| core_64     | GGGATTTTACCAGCCAGCCGGAAGCAAAAAG                                                                                                                                   |
| core_65     | TCAGCGATCTGTCTATTGGCAAGTTGTTGTTCCGGCAAC                                                                                                                           |
| core_66     | TAGGAAAGTCCCATAAGGTCATGCCGTCATTTAACCTTGAAGACCAA                                                                                                                   |
| core_67     | CTGCCGCTTACCAGGATACCTGTCCAGAGGTGAACGCAAG                                                                                                                          |
| core_68     | TAATACGTAGATGTAGCATATGAAGTTTCTAAGTCTTCT                                                                                                                           |
| core_69     | GCGGACTTTATCAGGGAGAGCCGGCAGCAGGC                                                                                                                                  |
| core_70     | TTACGCGCAGAAAAAAGGATCTCAAGAAGATCCTGTCAAACCGCTATCCACGCCCATTTGAT                                                                                                    |
| core_71     | GAACTTAATCCGGTAACTATCGTCTTGAGT                                                                                                                                    |
| core_72     | CTCTTGATCCGGCAAACAACCCAGCTGGTAAAGTATATATGAGTA                                                                                                                     |
| core_73     | TACCTTCCGAAAAAGAGTTGGTAGTTACCAATGCTTAATC                                                                                                                          |
| core_74     | TTTTTTAGAAGGACAGTATTTGGTATCTGCGCGAAGTGGTATACGGGA                                                                                                                  |
| core_75     | TTTTTCAGGCGGGCCATTATACTGGGCTCTGCAGGATCTGACGCTGGTAGT                                                                                                               |
| core_76     | TCTCATAGCCCAACTGATCTTCAGGAGCAAAACAGCTTGC                                                                                                                          |
| core_77     | CATATATCTGCAATGTATCACTCTAGGCCGAAGGGGTTCCGCGCACATTTCCCC                                                                                                            |
| core_78     | GCTCAAGTCGCCTTTCCGGTGAACAGTCCTCAGGATGGG                                                                                                                           |
| core_79     | AGGCCGCGCGGTGTAGGAGATCCAGTTCGATG                                                                                                                                  |
| core_80     | TTAACTACATGTTGTGGGCGGAGCGGTTACCAGGAAGATCCCAATAGAATGACAC                                                                                                           |
| core_81     | ATAACTAGCTAGCTTAGGCAGCAGGACCGAGTTGCTCTTGAAACAAAT                                                                                                                  |
| core_82     | AGCATGGCCCAACCCGGGATAATACCGCGCCACGGATACACCTGGACG                                                                                                                  |
| core_83     | TTTTGTGCTACAGAGTCTTTCGAGGTAACCAAGTC                                                                                                                               |
| core_84     | TTTTTCCCCTGGAAGCTCCGATACCAGATGTGAGT                                                                                                                               |
| core_85     | AAGGAACCCCTAGTGATGGAGTTGGCCACTCCCTCT                                                                                                                              |
| core_96     | CAGTTTACCGTAAATACTCCACCCATTGACGTCAATGGAAAGTCCCTATTGGCGTTACTATGGGAACA<br>TACGTCATTATTGACGTCAATGGGCGGGGTCGTTGGGCGGTACGCCAGGCGGGCCATTTACCGTA<br>AGTTATGTAACGCGGAACCT |
| rec1_1      | CAAGGCGAGGTCGGGGACTCTTCCCGCTGGATTGAGGGCCGAAG                                                                                                                      |
| rec1_2      | CGTCCGAAGCAGCCCGTCCCATCCAGTGATTGATCTTTTCT                                                                                                                         |
| rec1_3      | CAGTGCCCTCCCCGACAGGATGTTTGCACGCCATTACGCTCCGCTGTT                                                                                                                  |
| rec1_4      | GTCCATGCCAAGCTTCCGGTGGTTCCGCCA                                                                                                                                    |
| rec2_1      | ATTCTGAGGAAAAGTGAATCAGCGCCCCCGAGTGGCGAGAAAAG                                                                                                                      |
| rec2_2      | AGGACAGTGGGAGTGGCAGCACAATGCACTTATCTACGTAGC                                                                                                                        |
| rec2_3      | CGCGGAAGCACAGTCTGAGCCTTACTTAC                                                                                                                                     |
| rec2_4      | AGGGATCATTTTTCGAGATACATCTGGACCTATCAGCCAGT                                                                                                                         |
| rec2_5      | TTCTCTTATTTTTGTTCCACCTAAGTTCGAGGTGCCGTAAGACAC                                                                                                                     |
| rec2_6      | AGGAGCACGCTGCGCGTAACAGTGAGGCCCCAGTGGGGCTATG                                                                                                                       |
| rec2_7      | TACGTAGAGTCTCCGATTTATCACTCGGCGGCCATGCTGATGCAATTC                                                                                                                  |
| pro1_pass_1 | TTGGTCTCACCTTGATTGGGGGTTTCGTTGCCTGCAACCAGTTTTT                                                                                                                    |
| pro1_pass_2 | CAAAACCGCATCACCATGGTATCCCGTTGATTTTGGTGCTTTTT                                                                                                                      |
| pro1_pass_3 | TTTTTGACATTTTGGAAAGATACTACCGCCCATTACTCGGAAAGG                                                                                                                     |
| pro1_pass_4 | TTTTTACGGGAAGTCCCTATAAGAAAATGGCAATGCC                                                                                                                             |
| pro1_pass_5 | AAGCAGCGCAATAGCAGGTGGTGAAGCCATTTTTT                                                                                                                               |
| pro1_pass_6 | TTTTTCAAACAAGCGTCAATGGGGCGGACGCGCGATGAC                                                                                                                           |

|             |                                                       |
|-------------|-------------------------------------------------------|
| pro1_pass_7 | TTTTTGATTTATACAAGGAGGAAGAGACAGACAACGG                 |
| pro1_pass_8 | GCAACGTGTACAGTTGTTACTTTTT                             |
| pro2_pass_1 | GCAATAATCAATCTAGCGGTGAAAATGAATTTTT                    |
| pro2_pass_2 | GGGGAGGCTCGAGTCCTTATCGCTGTCTGCCCCACCCCATTTTT          |
| pro2_pass_3 | TCCTTGAAGGCAGGCGGAGCCCCTGTCCAGCAGCCGTCTTCCCTTTTT      |
| pro2_pass_4 | TTTTTCTTACCTAGATCCTTGATTATCACACGTTAACATGCTCT          |
| pro2_pass_5 | TTTTTAATCTCCCCCTTGGGAATTCTGACGCTCTGGTCTGCAACTTTA      |
| pro2_pass_6 | TTTTTGTTTTAAAGGTCATGATTAATTAAGTTTTTTTT                |
| pro2_pass_7 | TTTTTCCCCCAGCAGCATGCCTGCTATTCTTAACAGGCGAGCCTTCAGC     |
| pro2_pass_8 | GTTTGCAAGCAGCAGACGAAAACAAAAGGATTTTTT                  |
| pro1_x8_1   | TTGGTCTCACCTTGATTGGGGGTTTCGTTGCCTGCAACCAGCGGCTCCA     |
| pro1_x8_2   | CAAAACCGCATCACCATGGTATCCCGTTGATTTTGGTGCTCCCTTCG       |
| pro1_x8_3   | GCAAACAAGACATTTTGGAAAGATACTACCGCCATTTACTCGGAAAGG      |
| pro1_x8_4   | TCATCCATACGGGAAGTCCTCATAAGAAAATGGCAATGCC              |
| pro1_x8_5   | AAGCAGCGCAATAGCAGGTGGTAAAAGCCATAGTTGCCT               |
| pro1_x8_6   | CGCCTTTCCAAAACAAGCGTCAATGGGGCGGACGCGCGATGAC           |
| pro1_x8_7   | ACGCTCAGGATTTATACAAGGAGGAAGAGACAGACAACGG              |
| pro1_x8_8   | GCAACGTGTACAGTTGTTACACCACCGC                          |
| pro2_x8_1   | GCAATAATCAATCTAGCGGTGAAAATGAAAGTTTCTA                 |
| pro2_x8_2   | GGGGAGGCTCGAGTCCTTATCGCTGTCTGCCCCACCCCATCTTTCAC       |
| pro2_x8_3   | TCCTTGAAGGCAGGCGGAGCCCCTGTCCAGCAGCCGTCTTCCCTTGGTCTG   |
| pro2_x8_4   | ACCAGGCGCTTACCTAGATCCTTGATTATCACACGTTAACATGCTCT       |
| pro2_x8_5   | GAGTAAACAATCCTCCCCCTTGGGAATTCTGACGCTCTGGTCTGCAACTTTA  |
| pro2_x8_6   | ACAAGCCCGTTTTAAAGGTCATGATTAATTAAGTTTTTTTT             |
| pro2_x8_7   | CCAGTCAACCCCCCAGCAGCATGCCTGCTATTCTTAACAGGCGAGCCTTCAGC |
| pro2_x8_8   | GTTTGCAAGCAGCAGACGAAAACAAAAGGATTTTCCCCC               |
| pro1_x5_1   | TTGGTCTCACCTTGATTGGGGGTTTCGTTGCCTGCAACCAGCGGCT        |
| pro1_x5_2   | CAAAACCGCATCACCATGGTATCCCGTTGATTTTGGTGCTCCCT          |
| pro1_x5_3   | AACAAGACATTTTGGAAAGATACTACCGCCATTTACTCGGAAAGG         |
| pro1_x5_4   | TCCATACGGGAAGTCCTCATAAGAAAATGGCAATGCC                 |
| pro1_x5_5   | AAGCAGCGCAATAGCAGGTGGTAAAAGCCATAGTTG                  |
| pro1_x5_6   | CTTTCCAAAACAAGCGTCAATGGGGCGGACGCGCGATGAC              |
| pro1_x5_7   | CTCACGATTTATACAAGGAGGAAGAGACAGACAACGG                 |
| pro1_x5_8   | GCAACGTGTACAGTTGTTACACCAC                             |
| pro2_x5_1   | GCAATAATCAATCTAGCGGTGAAAATGAAAGTTT                    |
| pro2_x5_2   | GGGGAGGCTCGAGTCCTTATCGCTGTCTGCCCCACCCCATCTTT          |
| pro2_x5_3   | TCCTTGAAGGCAGGCGGAGCCCCTGTCCAGCAGCCGTCTTCCCTTGGT      |
| pro2_x5_4   | AGGCGCTTACCTAGATCCTTGATTATCACACGTTAACATGCTCT          |
| pro2_x5_5   | TAAACAATCCTCCCCCTTGGGAATTCTGACGCTCTGGTCTGCAACTTTA     |
| pro2_x5_6   | AGCCCGTTTTAAAGGTCATGATTAATTAAGTTTTTTTT                |
| pro2_x5_7   | GTCAACCCCCCAGCAGCATGCCTGCTATTCTTAACAGGCGAGCCTTCAGC    |
| pro2_x5_8   | GTTTGCAAGCAGCAGACGAAAACAAAAGGATTTTTCC                 |

## 2.2.6 sc\_EGFP6

### Scaffold sequence for sc\_EGFP6:

attaggggacctcagtgagcgcagcgcagagagggagtgcccaactccatcactaggggttcctgtagtaaatgattaaccgcat  
gctacttatctacgtagccatgctctaggaagatcgaattcgcccttaagctagctagttattaatagtaatacaattacggggtcattagttcatag  
cccataatagggatccggttacataaactacggtaaatggcccgcctggctgaccgccaacgacccccgccattgacgtcaataatgac  
gtatgttccatagtaacgcaatagggacttccattgacgtcaatgggtggagtattacggtaaaactgccacttggcagtacatcaagtgtat  
catatgccaagtacccccattgacgtcaatgacggtaaatggcccgcctggcattatgccagttacatgacattatgggacttctacttgg  
cagtacatctacgtattagtcacgtattaccatgggtgatgctggtttggcagtacatcaatgggctggatagcgggttggactacggggatttcc  
aagctccacccattgacgtcaatgggagttgtttggcaccaaaatcaacgggacttccaaaatgtcgaacaactccgccccattgacgc  
aaatgggctggtagcgtgggaggtctatataagcagagctggtttagtgaaacgctcagatcctgcagaagttggtcgtgaggcact  
gggcaggttaagtacaaggtacaagacaggttaaggagaccaatagaaactgggctgtcgagacagagaagactctgcttctgatag  
gcacatttggcttactgacatccacttggcttctccacaggtgtccaggcggccgcatggtgagcaagggcgaggagctgttaccgg  
ggtgtgcccactcgtgagctggacggcgacgtaaacggccacaagttcagcgtgtccggcgaggggcgaggcgatgccacctacgg  
caagctgacctgaagttcatctgcaccaccggcaagctgcccgtgcccaccctcgtgaccacctgacctacggcgtgacgtgctt  
cagccgctaccccgaccacatgaagcagcagcacttctcaagtcggccatgccgaaggctacgtccaggagcgcaccatcttcaagg  
acgacggcaactacaagaccgcgaggtgaagttcagggcgacacccctggtgaaccgcatcgagctgaagggcatcgacttcaag  
gaggacggcaacatcctgggcaacaagctggagtacaactacaacagccacaacgctctataatcatggccgacaagcagaagaacggcat  
caaggtgaactcaagatccgccacaacatcgaggacggcagcgtgacgtcggcaccactaccagcagaacacccccatcgccgac  
ggccccgtgctgctgcccgacaaccactacctgagcaccagctccgcccagcaaaagaccccaacgagaagcgcgatcacatggtcctg  
ctggagttcgtgaccgcccgggacactctcggcatggacgagctgtacaagtaataagctggatccaataacacctggtattacaaaatt  
gtgaaagattgactggtattcttaactatgttctcctttacgctatgtggatacgtgctttaaagccttggatcatgctattgcttcccgtatggcttc  
atlttctcctctgtataaaactcgtgtgcttctttatgaggagttgtggcccgtgtcaggcaacgtggcggtgtgactgtgttctgacgc  
aacccccactggttggggcattgccaccacctgacgtccttccgggacttccgcttccccctccctattgccacggcggaactcatcgccgc  
ctgcttggccgctgctggacaggggctcggctgttggcactgacaattccggtgtgttgcgggaaatcatcgtccttcttggctgctgcct  
gtgttggccactggattctgctgcccggacgtcctctgctacgtccttccggccctcaatccagcggaccttcttcccggcctgctgcccgtct  
gccccttctccgctctcagatctgctcactgctgcttctagttgccagccatctgttggcttccccctccccgctccttcttaccctggaa  
ggtgccactcccactgcttcttaataaaaatgaggaaatgcatcgattgctgagtaggtgtcattctattctggggggtgggggtggggcagg  
acagcaagggggaggattgggaagacaatagcaggcatgctgggactcgagttaggggcaattcccgataaggatcttctagagcat  
ggctacgtagataagtagcatggcgggtaataactacaaggaacccctagtgatggagttggccactcccctctgctgctgctgctgct  
cactgaggccccttaATTAACattaagcgcggcgggtgtggtgttacgcgcagcgtgaccgctacacttggcagcgccttagcggccgct  
ccttctgcttctccttcttctcgcacgctcggcgttccccgcaagctctaaatcgggggctccctttagggttccgatttagtgccttacgg  
cacctgacccccaaaaacttgattaggggtgattcacgtatgtggccatcgccctgatagacgggttttccgctttagcgttggagttccag  
ttcttaatagtgactctgttccaactggaacaacactcaaccctatctcgttctattctttgattataagggatttccgatttccgctattggt  
taaaaaatgagctgatttaaaaaaatttaacgcgaatttaaaaaaataacgcttacaatttaggtggcacttctcgggaaatgtgctgcg  
aacccctattgttttttctaaatacattcaaatatgtatccgctcatgagacaataaccctgataaatgcttcaataatattgaaaaggaaga  
gtatgatttcaacatttccgtgctgccccttattcccttttggcgaatttgccttctgttttgcaccagaaacgctggtgaaagtaaaagatg  
ctgaagatcagttgggtgacagagtggttacatcgaactggtatcaacagcggtaagatcctgagagtttcccccgaagaacggtttcca  
atgatgagcacttttaagttctgctatgtggcgggtattatcccgtattgacgcccggcaagagcaactcggctgcccacatacactattctag  
aatgactggttagtactaccagtcacagaaaagcatcttacggatggcatgacagtaagagaattatgcagtgtgcccataaccatgagt  
gataacactgcccgaacttacttctgacaacgatcggaggaccgaaggagtaaccgcttttgcacaacatgggggatcatgtaactcgc  
ctgatcgttgggaaccggagctgaatgaaccataccaaacgacgagcgtgacaccacgatgctgtagcaatggcaacaacgttgcgca  
aacttaactggcgaactacttacttactgcttcccggcaacaattaatagactggatggaggcggataaagttgcaggaccacttctgctc  
ggccctccggctggtgttattgctgataaatctggagccggtgagcgtgggtcagcgggtatcattgacgactggggccagatggtgaa  
cctcccgtatcgtatctacacgacggggagtcaggcaactatggatgaacgaaatagacagatcgtgagataggtgctcactgatt  
aagcattgtaactgtcagaccaagttactcatatatactttagattgatttaaaacttcaatttaattaaaggatctaggtgaagatccttttctg  
aatctcatgacaaaatccctaacgtgagtttcttccactgagcgtcagaccccgtagaaaagatcaaggatcttctgagatcctttttctg  
cgcgtaatctgctgctgcaaaaaaaaaccaccgctaccagcgggtgttggcttccggatcaagagctaccaactcttctccgaaggtaac  
tggctcagcagagcgcagataccaaatactgtccttctagtgtagccgtagttaggccaccactcaagaactctgtagcaccgctacatacc  
tcgctctgtaaatcctgttaccagtgctgctgcccagtgggcagataagctgcttaccgggttggactcaagacgatagttaccggataaggcgc  
agcggctcgggctgaacggggggtcgtgacacagcccagctggagcgaacgacctacaccgaactgagatacctacagcgtgagctat  
gagaaagcggcagcctcccgaaggggagaaaggcggacaggtatccggtaagcggcagggctggaaacaggagagcgcagcaggggag  
ctccaggggaaacgctggtatctttagtctgctggttccgacctgactgagcgtgattttgtgatgctgctcagggggggcga  
gcctatggaaaaacgccagcaacgccccttttaccggtcctggccttttgccttttgcctacCTTA

## Corresponding DNA origami designs and staple lists:

### 2.2.6.1 sc\_EGFP6 20HB

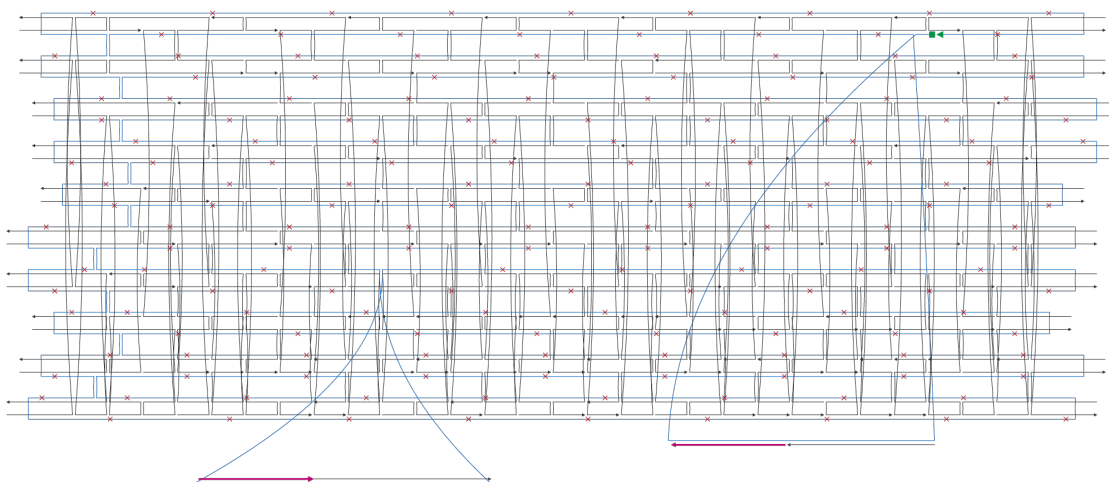

**Fig. S39 | Scaffold routing and staple design for sc\_EGFP6 20HB.** Scaffold routing is shown in blue, staples are given in black, breakpoint for addition of sequence is marked by a green square (5') and arrow (3'). Staple sequences which position the ITR hairpins to flank the 5' promoter region and the 3' polyA region are given in pink (ITR hairpin is position on the left side of each of the loops). Design was prepared using caDNAo v0.1.

**Table S26 | Individual staple sequences for sc\_EGFP6 20HB.**

| Name    | Sequence 5' - 3'                                              |
|---------|---------------------------------------------------------------|
| core_1  | AATGACCCGACGTC AATGGAAAGCCCGTTGA                              |
| core_2  | TAGCTAGCTGGGCAGTTTACCGTATTGACGT                               |
| core_3  | CGGGTTAATACCGTCATTGACGTCTGATGTA                               |
| core_4  | CATTATTGGGTTTTTATTTTTGTCTCATCATTAGCCATGCGCTGCTATTGTCTTCC      |
| core_5  | GGCGTTACACTCCATATATGGGCTCGACCCTG                              |
| core_6  | CACCCATTTCGTAATTGATTACTATCCTGGAAG                             |
| core_7  | AAATACTCTGATCTTTATTTCCCCAGTTCGAACACACAATGACACCTACTCA          |
| core_8  | CTGCCAAGTTAAGGGCGAATTCCGACAGGAC                               |
| core_9  | GGCGTACTGGCTACGTAGATAAGATCGACGC                               |
| core_10 | GGGCCATTTCACTAACACTAAGGCTCCG                                  |
| core_11 | CCCCGTGCCAGTTTCTATTGGTCTCGCCGCTCCCCGTTACAGGCAATGCCATCTGCGTCAG |
| core_12 | CACTAAACCAGCTCTGGGTGGTCAGATTTATTTATCCG                        |
| core_13 | GACGGTTGTTGTTACGACATTTTGGAAAGTTCCTATTGCAGAAAGCGTTAA           |
| core_14 | CACGACCAACTTCTGAGCTTGCGATACCGTGCCGGGAGTGTATGCGGGAAAGC         |
| core_15 | TGTAACCTTGATACTGTCAGCTTAGGGCTTTAATAGT                         |
| core_16 | ACCTGTCTCAATGGGGTGGAGACTTGGAAATTTGATGTAGAACGAAAAGAAAAAT       |
| core_17 | AAACGCAAGAGTCTTTACGTCGCCTGTCTATGGTATGGATGGCAG                 |
| core_18 | GATGTCAGTAAGACCAACCACCCCGCTTAATCGATCAAGTAAGTTG                |
| core_19 | TGAAGAAGGGGCCAGGGCACGGGCCAGGATCTGATTACGC                      |
| core_20 | TCCTGGACCAGATGAACTTCAGGTACCTGCCGATCCTT                        |
| core_21 | GTTGCCGTTGGCATCGCCCTCGCCTCCTTAACCTCAGTG                       |
| core_22 | CCTCGAACGAACCTTGTGGCCGTTCTCTGTCTTTTGGTC                       |
| core_23 | TCAGCTCTCGACCAGGATGGGCATAGGTGCACCTAGA                         |
| core_24 | GGTCTTTGGGTCACGAACTCCAGGGCAGGCG                               |
| core_25 | CGGCGAGGTCAATCTTTACAAGTGGGGGTCGTAAGAT                         |
| core_26 | GTTCTTCTACAAGGCATTAAGCCTCCTCATGCCGAGT                         |
| core_27 | CCGGCCGGCCTCAGGGCGGACTGGGTGCTCAGGGCGGACTTTAATTGTCGTGACCC      |
| core_28 | GCTCGTCCATGCCGAAGGGAGGGGCGACCG                                |
| core_29 | CTTGATACATGTCGGGCAGCAGCAGGGGCCGTTGGTGCCTTCGCCAGACCATCTG       |
| core_30 | GTTGATTGGATCCAAGCTGACTCAACCAACAGAATAG                         |
| core_31 | ATCCAGAGTGGGGGTGTTCTGCTGGTAGTGGTTCTTTAGCCATTGCCGTGTAG         |
| core_32 | GAATACCACTGCACGCTGCCGTCCTCGATGTGTGTCGCCGTCGTTTTTCGTTCCACCAGCG |
| core_33 | CGTAAAAGGAGCAACACCACGCCACACTGCAT                              |
| core_34 | CCACATAGATCTTGAAGTTACCTTGATGCCGATGCCCTTCCCAACAGTGAGGCAGGCAAAA |
| core_35 | CGTTGCCCTCCGCTGGATTGAGGGCCGAAGGGGAAAGGAAATCTCTTTACTTT         |

|          |                                                                 |
|----------|-----------------------------------------------------------------|
| core_36  | AAAGAGACCAGAGCCGGCAGCAGGCCGCGGGGTCAAGGAGTTATCACAAACAGGA         |
| core_37  | AATTGTCAGTTCGCCCGTGGCAATGAGTGATCCAGTCTA                         |
| core_38  | TGATTTCCCCGACAACACCACGGCACTCTAGTTGCTGTTCTTCACGCTCACAAAGCAGCA    |
| core_39  | AGGACGAGAAAGTCCCGGAAAGGGCTTATTATAAGTAG                          |
| core_40  | CAGGTGGGCAATGCCCAACCAATTTTGTAACTGTTGTT                          |
| core_41  | AGAAGGACGTCCCGCGCAGAATCGACAATGCGCTTTTCTCACTCGTGATAACTACGTCTGACG |
| core_42  | GACGTAGCCAAACACAGTGCACATAGTTAAGTACGCT                           |
| core_43  | AAGGAAGGGACAACGGGCCACAAAGCGTATAGCTCCGG                          |
| core_44  | AGAGGCCGAGCAACCAGGATTTAAAGCAATA                                 |
| core_45  | CCCCCTTGACCCGCCATGCTACTTATAGACCG                                |
| core_46  | GATGCAATGTAGCGGTCACGCTGCTGGACTCTAGGGGTT                         |
| core_47  | CAGTGGGAAAAGGAGCGGGCGCTCTATCAG                                  |
| core_48  | AGGCACGGAACGTGGCGAGAAAATCACCCCTTATCAGG                          |
| core_49  | TGGCAACCCCGATTTAGAGCTTTGCCGTAA                                  |
| core_50  | CCGCCGCGCTTAATGTGTTTGAAGCCACCTA                                 |
| core_51  | TTATAAATCAAAGAATCTACGTGGAAAACCTTGCCCGCCTCCATC                   |
| core_52  | GTTGAGTGTGTTCCATAATTAAGAGGATCTTTGAGAATAAGCTAGAG                 |
| core_53  | CCACTATTAAGAACGGCGTAACCTGTAACCGTGACTGTTGCCGA                    |
| core_54  | AAGGGCGAAAACCGTAGGGCGCTAGCATCTTACTGTCTCGTGGT                    |
| core_55  | CCCCTACGTGAACCGGAAGGGAGTGAGCAATCATGGTTCTTCATTC                  |
| core_56  | TTTTTGGGGTTCGAGGGACGGGGAAAAAGGGGTCAGAAG                         |
| core_57  | TTAACCAAAACAAACAGCCGACGCGACTGCACGCCGTAGGTCAGCTTATATA            |
| core_58  | CTCATTTGCCAGGCTGGGCGGGGTCGTTGGCATAACGCGCTACCGCCATTTGCGTCAAT     |
| core_59  | GCGTTAATTGTTTCCCGGCTCCACGAGGGTTCGTGCTGCTTCATG                   |
| core_60  | TAAATTCACGCGGATATGGGAACATACGTGGGGCGGA                           |
| core_61  | ATATTTGATAGAGCATTGGCATATGATACAC                                 |
| core_62  | CGGATACGGCGATGGTCAAGTCAGAGGTGGCGAAACCCGATCTTCCATGTATTT          |
| core_63  | CTCATGAGTTTCTGGAGAAAGCGGTGGCACCTTCCAGG                          |
| core_64  | GAAGCATTAAATCAAGTCCCCCTGACGAGCATCACAAAATAGCATGGGTTATTGTATCAAAAA |
| core_65  | ATATTATTTGCCGCAAAGCCGGCGGGGAGGGGCAACAA                          |
| core_66  | CTTTTTCAAATTAATTAACCAATGGTGAACCGTCTCCTTGAAGTC                   |
| core_67  | ACTCTTCTGAGCAAAATGTACTGGGCATAATTAATAGCG                         |
| core_68  | GGGGCGAATATTTTGTAGATAGGCCGCTTACCGGATACCTGTCCGCGTTATGTA          |
| core_69  | AACTCTCAAATGATTACTGTCTGCCCCACC                                  |
| core_70  | ACCGCTGGCCCCAGTCTCAAGAACAGTGCCTTTTGGTGCCAAAACAAACTCCC           |
| core_71  | TTGAGTCCGAAAAGTCAAGAGTCTCCCTCGTGCGCTCTCCTGTTGATGAACCTAATTGTAA   |
| core_72  | CACCCAACAAACAAACACCGTCAATATAAAGATACCAGGCGTTTCCCTAATAACCCGCGCAC  |
| core_73  | TGATCTTCGGCAAGTTTCTCATTTTATTA                                   |
| core_74  | ACGGGATCCAGCATGCTCTAGGAAGATCCTAAATCGGG                          |
| core_75  | GCGTCAATGCGATGAGTGCCCAACAGCCGAGCCCCTGTGAGTCC                    |
| core_76  | GTGAGTACAGGTGGTGAACACAGGCGAGCAGCAAGGAACCCCCCGTCATTC             |
| core_77  | GCGAGTTAGCATGATGCTTGTCCGCCATGATATAGACG                          |
| core_78  | CATGATCCATGTTGACAGTCTCCTCGCCCTTGCAGAAAAG                        |
| core_79  | CAGCAATAAAAAGTGTAAATCAGAAAATCCCCCTTCGGGAAGCGTGCGCTTTCTGGCGGTCA  |
| core_80  | ATCCATAGTAAGGGACGACAAGCAGTCAAACCGCTATCCACGCCATAATAGGGATGAGATT   |
| core_81  | TCAGCGATCGTCCAGCGATGCGGTTTACCAGGTGTGGCGG                        |
| core_82  | ACCTATCGGATCTTCTATCAGCTGCCAAAACCGCATCACCATGGGCCAGGCTCCTTTTA     |
| core_83  | GTAGCGGTACGTCAAGGGCCATTTACCCTAAGTTTCTC                          |
| core_84  | AAAAGGATGCTGCAATCGGTGGTGGTAGCCTTCGGGCATGTAGTGGT                 |
| core_85  | TCTACGGGGATACGGGGCCGTAGGCGTCTTGAAGAAGATCGCCGA                   |
| core_86  | ACTCACGTTTGCCTGAGACACGCTTTACCTCGGCGCGGG                         |
| polyT_1  | TTTTTACCGTAAAAAGGATCGGAACCCTTTTT                                |
| polyT_2  | TTTTTAGGTATCTCAGTTCGGCATAGCTTGGCCTAAATAGGCCGTATCGGGA            |
| polyT_3  | TTTTTAGGAAAGTCCCAAATCTAAAGTTTTTT                                |
| polyT_4  | TTTTTCAAAGCTGGGCTGTGTTGTAGTTCATCCGGCACTACGGCTACACTTTTT          |
| polyT_5  | TTTTTCTGGACACCTGTGGATCACCATGGCGGCCGTTTTT                        |
| polyT_6  | TTTTTGCCCGACCGCTGAGGTTTCGAAAAAGAGTTTTTTT                        |
| polyT_7  | GCCCCAGGCCCATGTAACCTTGGTTCGACACGGAAATTTTTT                      |
| polyT_8  | TTTTTTGTACTCCAGCTTGTGTTGTGGCTGTTGTAGTTTTTT                      |
| polyT_9  | TTTTTCGCTTGTAGTCCAACCCGATCGCGCTTCTCGTTGGTGGTTCGGGCTGCAAC        |
| polyT_10 | TTTTTATGAAAGCCATACGGGTACAAGGAGGTCTCTC                           |
| polyT_11 | TTTTTATCGCCACTGGCAGCGCAGCGGGCAACAGGACCA                         |
| polyT_12 | TTTTTGTGAGGACAGATCTCGAAGACGCGGACAGATGGCCGATCGTTAATAAGGG         |
| polyT_13 | TTTTTGAGCGAGGTATGTAGGCGCCCTTAACTCCAAGCCACTGGTAACAGGATTAGCATTTTT |
| polyT_14 | TTTTTTAAAGGGAGCCTAGAAGGCACATTTTT                                |
| polyT_15 | TTTTTCTGAAGTGGCACGCTGTTTTTT                                     |
| polyT_16 | TTTTTGTGAATCACTATAGCATAACCGGTTGCTGGCGTTTTTTCATATTAAGGG          |
| polyT_17 | TTTTTTAGAAGGACAGTAATTCGGTGCTACAGAGTTTTTTTT                      |
| polyT_18 | TTTATAGCAGAACTTTAACCCAGCCACCGCTGGACCTCCACCGCGAACCCCGGTTCATTTTT  |

|          |                                                                           |
|----------|---------------------------------------------------------------------------|
| polyT_19 | AATACCGCGCCACGGGAGCGCAGTGTGGTAAGACACGACTTTTTTT                            |
| polyT_20 | TTTTTGGTTAGCTCCTTCGGAGAAATTTTT                                            |
| polyT_21 | TTTTTAAGCCAGTTACCGCCTATCTGCGCTCTGCTGTTTTT                                 |
| polyT_22 | AAGTGGTCGTAGCGGCTGAACCTATCCGGTAACTATTTTTT                                 |
| polyT_23 | CTGACAGAATGAAGTGCAAAGTGATGACTAATACGTAGATGTAAGTCCAAAGTTTTT                 |
| polyT_24 | TTTTTATATATGAGTATGTGCAAAAAAGCTTTTT                                        |
| polyT_25 | TTTTTGGTAGCTCTTGGTTTCGCTTTTTT                                             |
| polyT_26 | TTTAAATCTAAGGTCAGGCCAGCAAAAGGCCAGGATTTTT                                  |
| Loop_1   | AGGAACCCCTAGTGATGGAGTTGGCCACTCCCTCT                                       |
| Loop_2   | AGAGGGAGTGGCCAACTCCATCACTAGGGGTTCTTGTAGTT                                 |
| ITR_1    | CTGCGCGCTCGCTCGCTCACTGAGGCCGCCCGGGCAAAGCCCGGGCGTCCGGGCGACCTTTGGTCGCC<br>C |
| ITR_2    | GGGCGACCAAAGGTCGCCCGACGCCCGGGCTTTGCCGGGCGGCCCTCAGTGAGCGAGCGAGCGCGC<br>AG  |

### 2.2.6.2 sc\_EGFP6 20HB-exLP

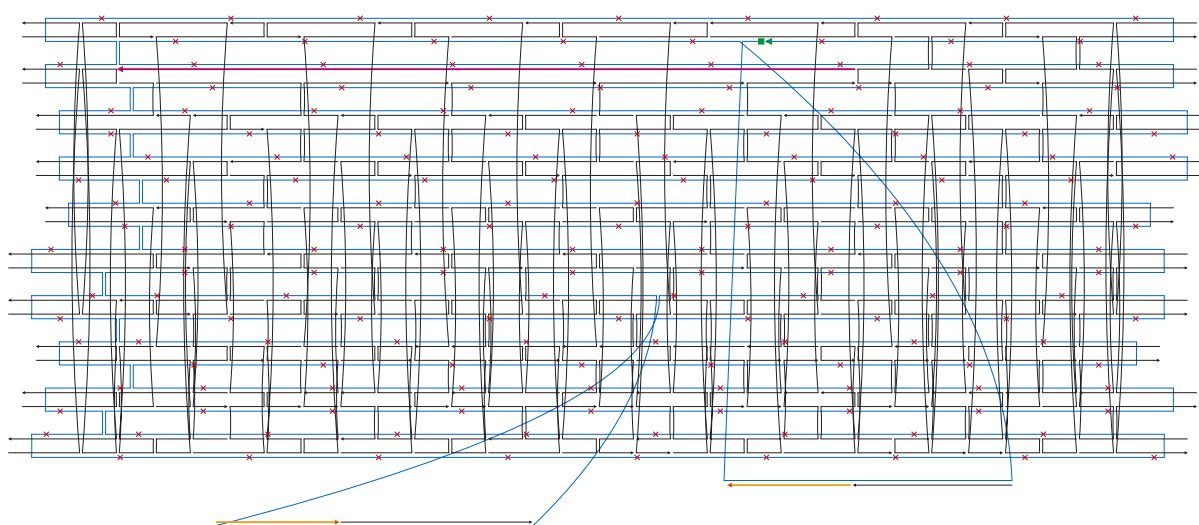

**Fig. S40 | Scaffold routing and staple design for sc\_EGFP6 20HB-exLP.** Scaffold routing is shown in blue, staples are given in black, breakpoint for addition of sequence is marked by a green square (5') and arrow (3'). Staple sequences which position the ITR hairpins to flank the 5' promoter region and the 3' polyA region are given in orange (ITR hairpin is position on the left side of each of the loops). Long 154-mer 'primer' sequence at the promoter (5') region is given in pink. Design was prepared using caDNAno v0.1.

**Table S27 | Individual staple sequences for sc\_EGFP6 20HB-exLP.**

| Name    | Sequence 5' - 3'                                         |
|---------|----------------------------------------------------------|
| core_1  | CCGATCTTCCTAGAGCATGGCTACACCTGTCC                         |
| core_2  | AGTAGCATGGCGGGTTAATCATTCTCCTGT                           |
| core_3  | AACTACACTAATTAAGGGTGAGCAAAAGGCCGGCGTTTC                  |
| core_4  | GCCAGGAATACTGCCAAGTGGGCAGATGTAC                          |
| core_5  | ACTTGATGCCGTAAAAGGCCGGCGGCAAAC                           |
| core_6  | GTCCCCTTGATTTTGGTGCCAAAACAACCTCATTTGCGTCAATGGGGAACTTCA   |
| core_7  | TAGACCTCCCACCGTCGCCCTCCAGCCGTTGCCATT                     |
| core_8  | CTGACGGTTCACCTAATGTGGCCGACCGGCTCTCGTCGT                  |
| core_9  | TGCAGGATATTGATGTAAGTACTGCCAAAACCGCATCACCAT               |
| core_10 | CCCAGTGCCTCACGACAGGATGGGTGCTGCAGGTTCCCATCTGAGAAAACCTCCTC |
| core_11 | AAACCTGTCTTGAATCGCCCTTACGATACGCCCCATCTGTGAC              |
| core_12 | CTCGACAAGCCAGTTCACTGTGAGTTGCCTTTCGGTCTTACTG              |
| core_13 | GCCGTAGGTTGCCGTAGGTGGCATAACGCCT                          |
| core_14 | TGTGGTCCGGACAGCTGAACCTACCAGCTC                           |
| core_15 | ATGGCGGAGCCGTCCAGCTCGACCCAACTTCAAGGATC                   |
| core_16 | GATGGTGCCCGGTGAACAGCTCCCCTTGATA                          |
| core_17 | GGTCTTGTGGCGGCCGCTGGATCTATTGTATGAGTA                     |
| core_18 | CACGGGGCCTCAGGGCGGACTGGCCCGGAAA                          |

|         |                                                                  |
|---------|------------------------------------------------------------------|
| core_19 | CTTGATGTACTTGTACAGCTCGCGGGCCACTAGTGAT                            |
| core_20 | TCCAGCTTAAGAATACCAGTCAATGCCATACGTCATGCCA                         |
| core_21 | GGTCTTTGCGTCGCCGATGGGGGTGTTCTGCCACTGCACCAACGTTGGAAGGGCC          |
| core_22 | CATGTGATCGCGCTTCCCACTAGCAGAA                                     |
| core_23 | AGCAGGACGTGCGCGAGCTGCACGCTGCCGTCTGCTTCAGTGTACGCCAGATTT           |
| core_24 | TCCCGGCGCGGTCACAGTGCACGGCGTCATAGGAAAG                            |
| core_25 | GAGAGTGAGTTGTGGCGGATCTTGAAGTTCACTTCGGGCTCAGCTCCATGATAC           |
| core_26 | AAGCTTATCCGTTCTTCTGCTTGTGCGCCATTGAAGAATACATGATGGAGGGCGGAATAAG    |
| core_27 | TAATCCAGAGGTTGATCCAGGATTTGGTGAGT                                 |
| core_28 | AAATTTTGCCTTGTGGCTGTTGTAGTTGTACTCGGCGCGGTTAGCTCGACTCCCCTCATACTC  |
| core_29 | ACAGGTGGTGGCAATGCTCGTTGGGTTGCG                                   |
| core_30 | GTTGCGTCAGCAAACACGAACTCCCATCGTG                                  |
| core_31 | CACGTTGCCTGACAATCCATGCCGGCTTCAT                                  |
| core_32 | TATACAAGTCCAGGTGGCAACACAGGCGAGCGGGCAAACACTCAACCCAAAAAAG          |
| core_33 | GAGGAGAAAATGAACTTTACAAAAAGCG                                     |
| core_34 | GGAAGCAAGGGACGTAGCAGAAGGACGTCCCGCACAGTCTCCGTAAGTTGAATAC          |
| core_35 | AAAGGACGATGATTTCCCGGACAACCTCCAGCGCGACGGGTGAGCCGCGTGACTTATCAA     |
| core_36 | AGCCAAGGATAAAGAGACAGCAATGGATCCAGGCGAGT                           |
| core_37 | GGGCCGAATAGCATGATACAAAAGAGGAGCAA                                 |
| core_38 | CAGACAATGAATTGCGCCTTAACTTTAAAGAA                                 |
| core_39 | GGGTCAAGAAGAATGATTAACCCGACGTGAAAAATTTTT                          |
| core_40 | AACAGATGCCACCACCCCGCCGGGTCGACCCGAAAA                             |
| core_41 | GAGGCAGCTGGCAAGTGTAGCGAACCCCTAAATAACA                            |
| core_42 | CAGAGCCGAAGAAAGCGAAAGGGACGGGGA                                   |
| core_43 | CCAGCATGCCAGAAATAGAATGACGGCGATGA                                 |
| core_44 | CTTATCGGGCGATGCAATTTCTAGCCCCT                                    |
| core_45 | ACGTAGCCATGCTCTAGAAAAACCGTTAATC                                  |
| core_46 | CTTATCTGACAGTGGGAGTGGCACACCAC                                    |
| core_47 | GCGCGTAAGCTGGCAACTAGAAGGCGCAGAA                                  |
| core_48 | AACAAGAGTCCACTACGAGTCTCCAGTTCAGTGCTCAAGTTAATA                    |
| core_49 | TCCAACGTCAAAGGGCGGAAGTCACTGATCTATAATACCGCTACAGG                  |
| core_50 | AGGGCGATGGCCACTCCATGCTACGTTTCTCGAGTTGTTGGTAT                     |
| core_51 | CTAATCAAGTTTTTTGCGCTTAATAATGCCGAAGTCATACGATCA                    |
| core_52 | AAAGCACTAAATCGGGTCACGCTCGGAAATGATGCTTTTTGTTGTGCA                 |
| core_53 | CCCGATTTAGAGCTTAGCGGGCGTTCAATATATAATTCT                          |
| core_54 | CGAGATAGCGCAGACAGTCTATCGAGCTTGCCCGTGCAGATGCGGAGTTG               |
| core_55 | GAATAGACCTATGAACTAATGACCCCGTAATCTCAGTT                           |
| core_56 | GCAAAATTTTGTACTAAGTGGTGGGTCAGCTCAGGGTGGTCACGA                    |
| core_57 | CGAAATCGATTAATAACTAGCTAGCTTAAGGGGCGCTTT                          |
| core_58 | GTGCCACCGATCCTTTTGGCCCCAGCACCACCGCTCCTGGACGTAGCC                 |
| core_59 | ACATTTCCGTGCCGTCCCCTGGAAGCTCCCCTCGTGCCG                          |
| core_60 | TTAGAAAAGGGAGCCCGACAGGACTATAAAGATACCAAGCAAAGAATAGGGGTCAATCTA     |
| core_61 | GAATGTATTTCTTTCTAGGGCGATCTCGAAGACGCGGA                           |
| core_62 | ACATATTTCTGACAGTCAATCCATGAGAGAAGCCCTCGAACTTCACC                  |
| core_63 | AGCGGATCGTTTTTTCGGGGCGTACTTGGCATGGTCATGT                         |
| core_64 | GCTACTCTCAAGGATCCCTCCATCAAAAAAGGTTACGAC                          |
| core_65 | GATGTAAGAGCGCAGTTTCTACGACCCGCCCATTTGACGTCAATGGGGTGGAGACTTGAA     |
| core_66 | CCCCTCGCAATAGGCCGTGGACCTCATAGCTCAGCGTGTAGGTATTGATTACT            |
| core_67 | TCAGCATCAGCAAAAACCTCACTGCTTATAATCCCGTGAGTCAAACCGCTATCCACGCC      |
| core_68 | CTTTTACTAAATTTTTGTCTATCGCCTTTCTCCCTTCGGGAAGCGTGCGAATTAGCTCATT    |
| core_69 | AAAAACAGAAGCGTTCATCACCTCCGACCCTGCCGCTTACCGGATGTAGATAGTTAAAT      |
| core_70 | GAAGGCAAGTTAATTGAAGGCACGGGGGAG                                   |
| core_71 | AAACGTTCCCCACCCCTGCTATTGTCTTCTGTTGTTT                            |
| core_72 | GCGCCACACAGTGGGGTCCAGCAGCGGGCAAGGCAGGCACCTACTCTTTAAA             |
| core_73 | CTCTTGCCCAACCACGCGGAATTGTCAGTGCCCAACAGCCGATTTTATATACGGG          |
| core_74 | CCTCCGATCATAGTTGTGCCCCAGGATGTTGCCGCTCT                           |
| core_75 | CGTTGTCAGGGTGTGAGGCAAAGTGGATGTCAAGAGTC                           |
| core_76 | TTTATCCGTTACCGCAATCAAAACAGTTTGGCGGTGTAGGTGCTTCCGCTCCAAGCTATATGGG |
| core_77 | CCTGCAACAGTTGCGCTCATTGGAGGAGCTGGTTCCGCCGTGGCAATAGGGAGGTGCCCA     |
| core_78 | TTACCATCTAAATTAACCTGGGTAATAGCGATGACTAATACGTA                     |
| core_79 | AGATAACTGCTCACCATAGTTGCCGTCGCTCTGATATAGA                         |
| core_80 | GTCGTGTAAGTATAGTCTCCTTTGCCAAGTAGGAAAGTCCCATAAATGATACAACCTGGT     |
| core_81 | ATCTCAAGAAGATCCCCCTTATATGTTGAGA                                  |
| core_82 | GGGTCTGACGCTCAGTTTTAACTGCACCCA                                   |
| core_83 | TGGAACGATAAACCAGGCCCTCGCGGGTAGCGGCTGAAGTGGTAGTG                  |
| core_84 | GTTAAGGGATTTTGGTCCGCTTTTACCAG                                    |
| core_85 | TCATGAGACCACGCTCTTTACGTCTTGAAGAAGTCGTGCCTCGAT                    |
| core_86 | TTCACCTATAAATTGT                                                 |
| core_87 | AAAATGAAGTTTTAAATTCGCGCGGGCAGACA                                 |

|          |                                                                                                                                                                      |
|----------|----------------------------------------------------------------------------------------------------------------------------------------------------------------------|
| core_88  | GTTTACCGTAAATACTCCACCCATTGACGTCAATGGAAAGTCCCTATTGGCGTTACTATGGGAACATACG<br>TCATTATTGACGTCAATGGGCGGGGGTCTGTTGGGCGGTACAGCCAGGCGGGCCATTTACCGTAAGTTATG<br>TAACGCGGAACTCCA |
| polyT_1  | TTTTTCGAGCATCACAAGAACGTGGCGTTTTT                                                                                                                                     |
| polyT_2  | TTTTTAACCCCGTTTCAGCCTGGGCTGTGAAGCCAGGGTTGAGCCAATCCT                                                                                                                  |
| polyT_3  | TTTTTACCGTCATTGACGAGTGAGGCACTTTTT                                                                                                                                    |
| polyT_4  | TTTTTATCCGTAACACTATCGTCGACCGCTCAGATTACGTTACCTTCGGATTTTT                                                                                                              |
| polyT_5  | CTTGGAAAATTTTGAGTCCAACCCGGTATTTTT                                                                                                                                    |
| polyT_6  | TTTTTGCCTATCAGAAACGCAGTAAGACCAATAGGTTTTT                                                                                                                             |
| polyT_7  | TTTTTAGACACGACTTATTAGCGGTGGTTTTTTTTGTTTTT                                                                                                                            |
| polyT_8  | GTTACCAGAAGTAAATCTGTCTCATTTATCAGGGTTTTT                                                                                                                              |
| polyT_9  | TTTTTCTTCAGCTCGATGCGCCTTGAAGTCGATGCCTTTTT                                                                                                                            |
| polyT_10 | TTTTTCTGGTAACAGGATTAGCGTGGTTGTCTGGGCAGCAGGGGTGGGCAGTAAGT                                                                                                             |
| polyT_11 | TTTTTATCCACATAGCGTAAAGCATTAAATTATGGC                                                                                                                                 |
| polyT_12 | TTTTTGGCGGTGCTACAGAGAAAGCGAAAGTGTGCTCAG                                                                                                                              |
| polyT_13 | TTTTTGCGGGAAGGAAGGTCCGCTGGATTGAAGAGGCCGAGCACTGCTATTGAAG                                                                                                              |
| polyT_14 | TTTTTCGGCTACACTAGAAGGCCTTGCTGTCCGGTCTTGAAGTGGTGGCCTAACTATTTTT                                                                                                        |
| polyT_15 | TTTTTAGAAAGGAAGGGGCAGCAGGCCTTTTT                                                                                                                                     |
| polyT_16 | TTTTTTCGCTCTGCTGTGCACGTTTTT                                                                                                                                          |
| polyT_17 | TTTTTTTATTGTCTCATGAAGCCGGCAAATCGACGCTCAAGTCAGAGGTGTTGCTGG                                                                                                            |
| polyT_18 | TTTTTAAAAGAGTTGGTACCCACAGTATTTGGTATCTTTTT                                                                                                                            |
| polyT_19 | CTTCGGGGCGAAACTGTTGCCGGTAAGAGCGAGGTATGTATTTTT                                                                                                                        |
| polyT_20 | TTTTTTTATCACTCATGGGCAGCGTTTTTT                                                                                                                                       |
| polyT_21 | TTTTTCCACCGCTGGTAATTTGATCCGGCAAACAAATTTTT                                                                                                                            |
| polyT_22 | GAAGCTAGCAGGGCACGGGCCACTGGCAGCAGCCATTTTT                                                                                                                             |
| polyT_23 | ATTTTCGTTTACCAATTTCTCTGTACTGGGCATAATGCCAGGCGGGCCATTTTTTTTT                                                                                                           |
| polyT_24 | TTTTTCTATCTCAGCGGTTGGCCGCAGTTTTTT                                                                                                                                    |
| polyT_25 | TTTTTTTTGCAAGCAGGCGCCTTTTTTT                                                                                                                                         |
| polyT_26 | GCTTAATCTCAATAGCATAGGCTCCGCCCCCTGATTTTT                                                                                                                              |
| Loop_1   | AGGAACCCCTAGTGATGGAGTTGGCCACTCCCTCT                                                                                                                                  |
| Loop_2   | AGAGGGAGTGGCCAACTCCATCACTAGGGGTTCTTGTAGTT                                                                                                                            |



## 2.2.7 sc\_mCherry5

### Scaffold sequence for sc\_mCherry5:

taggctgcgcgctcgctcactgaggccgcccgggcaaagcccggcgtcggggacaccttggcgcggcctcagtgagcgagcg  
agcgcgcagagagggagtgcccaactccatcactaggggtcctttagttaatgattaaccgcatgctactatctacgtagccatgctca  
ggaagatcggaaatcgccctaagctagctagttattaatagtaataattacggggcattagttcatagcccataatggagttccggttacat  
aactacggtaaatggcccgcctggctgaccgccaacgacccccgccattgacgtcaataatgacgtatgttccatagtaaacgccaatag  
ggactttccattgacgtcaatgggtggagatattacggtaaaactgcccactggcagtacatcaagtgtacatagccaagtacgccccctattg  
acgtcaatgacggtaaatggcccgcctggcattatgccagttacatgacctatgggactttcctacttggcagttacatctacgtattagtcacgc  
tattaccatggtagtcgggtttggcagttacatcaatggcggtgagatgacgggttgcactacggggattccaagtcaccacccattgacgtcaat  
gggagttgtttggcaccaaaatcaacgggactttccaaaatgctgaacaactccgcccattgacgcaaatggcggttaggcgtgtacgggt  
gggaggtctataagcagagctgggttagtgaaacgctcagatcctgcagaagttgctgtaggcaactgggcaggttaagtcaaggttaca  
agacaggttaaggagaccaatagaaactgggctgtcgagacagagaagactctgcttctgataggcaccattggttctactgacatcca  
ctttgctttctccacaggtgtccaggcattatcgcaccatggtagcaagggcgaggaggataacatggccatcatcaaggagttcatgc  
gctcaagggtgacatggagggtccgtgaacggccacgagttcgagatcgagggcgaggggcgagggcgcccctacgagggcaccca  
gaccgccaagctgaaggtagcaagggtggccccctgcccctgcctgggacatcctgtcccctcagttcatgtacggctcaaggcctacgt  
gaagcaccgcccgcacatccccgactactgaagctgtccttccccgagggctcaagtgaggcgcgtgatgaacttcgaggacggcggc  
gtggtgacctgaccaggactcctcctgcaggacggcgagttcatctacaaggtgaagctgcgcccacccaactccccctccgacggccc  
cgtaatgcagaagaagaccatgggctgggagggcctcctccgagcggatgtaccggagggcggcctgaaggggcgagatcaagcag  
aggctgaagctgaaggacggcgccactacgacgtgaggtaagaccactacaaggccaagaagcccgtgcagctgcccggcgct  
acaacgtcaacatcaagttggacatcacctcccacaacgaggactacaccatcgtggaacagtagcaacgcccggagggcgccactcc  
accggcgcatggacgagctgtacaagtgagcgggtgattgatccaatcaacctcggattacaaaatttgtaaagattgactggtattctta  
actatgtctcctttacgctatgtggatacgtccttaatgcctttgatcatgctattgcttcccgtatggcttccattttctcctctgtataatcctg  
gttgcctcctttatgaggagttgtggcccgtgtcaggcaacgtggcggtgtgactgtttgtgacgcaacccccactggttggggcattg  
ccaccactgtcagctccttccgggactttcgttccccctccttattgccacggcgaactcatcgccgctgcttgccttgcctgctgacag  
gggctcggctgttgggactgacaattccgtgtgtgctggggaaatcatcgtccttctggtgctcgcctggttgcacactggattctgcg  
gggagctccttctgctacgtcccctcggcccaatccagcggacctcctcccggcctgctcggctcgcggcctctccgctcttcgag  
atctgcctcagctgtccttactgttccagccatctgtttgttccccctccccgtgccttcttacccttgaaggtgccactcccactgtccttct  
aataaaatgaggaaatgcatcgcattgctgagtaggtgtcattctattctgggggtgggggtggggcaggacagcaagggggaggattggg  
aagacaatagcaggcatgctggggactcaggttaagggcgaattccgataaggatcttctagagcatggctacgttagataagtagcatgg  
cgattgccttaATTAAcattaagcgcggcggtgtggtggttacgcgcagcgtgaccgctacactggcagcgcctagcggcccgtcctt  
cgcttctccttcttctcgcacgttccggcttccccgtcaagctcaaatcgggggtcccctttaggggtccgatttagtgctttacggcacc  
tcgaccccaaaaacttgattagggtaggttcacgtagtgggccatgcctctgatagacgggtttcgcctttgacgttggagttccacgttctt  
aatagtgactctgttccaaactggaacaacactcaaccctatctcgggtctattctttgattataagggattttccgattccgctattggttaa  
aaatgagctgatttaaaaaatlaacgcgaatttaacaaaatattaacgcttacaatttagtgggcacttttcgggaaatgtgcgcggaacc  
cctattgttttttctaataacattcaaatatgtatccgctcatgagacaataaccctgataaatgcttcaataatattgaaaaggaagagtatg  
agtattcaacatttccgtgtcgccttattcctttttgcggtatttgccttctgcttaccagaaacgctggtaagtaaaagatgtcga  
agatcagttgggtgcacgagtggttacatcgaactggatctcaacagcggtaagatccttgagagtttcccccgaagaacgtttccaatga  
tgagcactttaaagttctgtatgtggcgcggtattatccgattgacggggcaagagcaactcggctcggcagatacactattctcagaatg  
actggttagtactaccagtcacagaaaagcatctacggatggcatgacagtaagagaattatgagtgctgcataaccatgagtgata  
acactgcggccaacttactctgacaacgatcggaggaccgaaggagtaaccgctttttgcacaacatgggggatcatgtaactcgcctga  
tcgttgggaaccggagctgaatgaagccataccaacgacgagcgtgacaccacgatgcctgtagcaatggcaacaacgttgcgaaact  
attaactggcgaactacttacttagcttccggcaacaattaatagactggatggaggcggataaagttgcaggaccacttctgcgtcggcc  
ctccggctggtggttattgtgataaatctggagccggtgagcgtgggtcagcgggtatcattgcagcactggggccagatggtgaagcctc  
ccgtatcgtagttatctacacgacggggagtcaggcaactatggatgaacgaaatagacagatcgtgagataggtgcctcactgattaagca  
ttgtaactgtcagaccaagttactcatatatacttttagattgatttaaaacttattttaaataaaggatctaggtgaagatcctttttgataatc  
atgacaaaatcccttaacgtgagtttccactgagcgtcagaccccgtagaaaagatcaaaaggtatcctttagatcctttttctgcgcgt  
aatctgctgttgcacacaaaaaaaccaccgctaccagcgggtgttgtttgcccggatcaagagctaccaactcttttccgaaggttaactggct  
cagcagagcgcagataccaataactgtccttctagtgtagcgttaggttagccaccactcaagaactctgtagcaccgctacatacctcgt  
ctgtaactcgttaccagtggtgctgcccagtgggcagataagtcgtgtcttaccgggttgactcaagacgatagttaccggataaggcgcagc  
ggtcgggtgacggggggtcgtgacacagcccagctggagcgaacgacctacaccgaactgagatacctacagcgtgagctatgag  
aaagcggccagctcccgaaggagaaaggcggacaggtatccggtaagcggcagggtcggaaacaggagagcgcacgagggagctc  
caggggaaacgcctggtatctttagtctgtcgggttccacactctgactgagcgtcgattttgtgatctcgtcagggggggcgagcct  
atggaaaaacgcgcaacgcggccttttaccggttctcggccttttgccttcttgcctacCCTTAat

## Corresponding DNA origami designs and staple lists:

### 2.2.7.1 sc\_mCherry5 16HB\_1

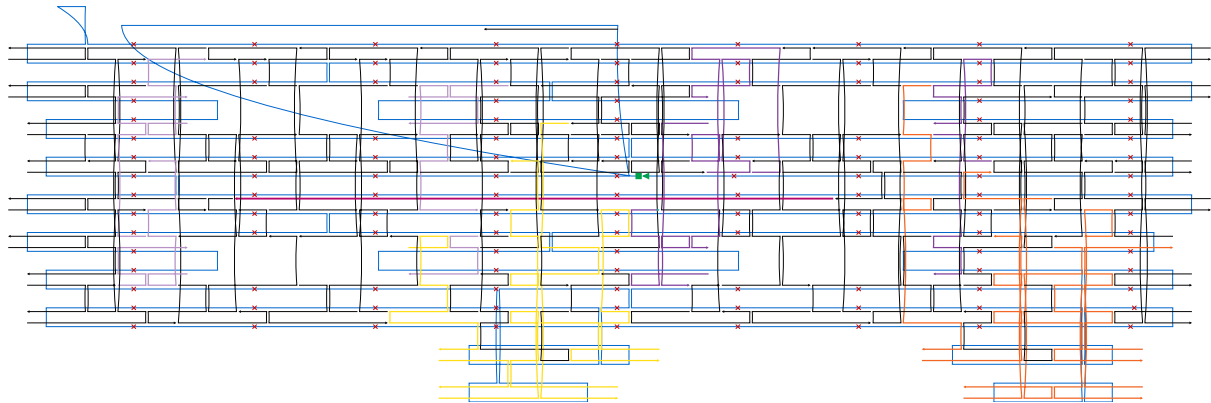

**Fig. S41 | Scaffold routing and staple design for sc\_EGFP5 16HB\_3.** Scaffold routing is shown in blue, staples are given in black, breakpoint for addition of sequence is marked by a green square (5') and arrow (3'). Long 154-mer 'primer' sequence at the promoter (5') region is given in pink. Protrusions 1 and 2 are shown in yellow and orange respectively, recess' 1 and 2 are given in light and dark purple, respectively. Design was prepared using caDNAo v0.1.

**Table S28 | Individual staple sequences for sc\_mCherry5 16HB\_1**

| Name    | Sequence 5' - 3'                                             |
|---------|--------------------------------------------------------------|
| core_1  | TAATACCGAACTAATGACCCCGTAATTGATTGTCAAAGCCACTCG                |
| core_2  | ATGCTTTTATGGCGGGTTAATCATTAACTACATCCCTT                       |
| core_3  | TTTTTCCCAACGATCAAGACCCGACATTTTT                              |
| core_4  | TTTTTTCGGGGCGAAAACCTCTATTGGAACGTTCTTTTTT                     |
| core_5  | AACTTTACGTTAAGGGATTTTGGTCATCGA                               |
| core_6  | TCCGCCTCCATCCAGTATAATTCTGGGTGAGCAAAA                         |
| core_7  | TAGTTCGCCCCGCTTTAAACCCCGCACCTTGAAGCGCATCCAGCCCA              |
| core_8  | TTTGGTATAAACCACCGCTGGTAGTCTGCTGA                             |
| core_9  | AAGGCAAAATGCCGGAATACTCTGAGCGGATACATATTTGATTTTT               |
| core_10 | TCACCAGCGTTTCTGGGTGAGCACGCACATTACCGTCTAGGAAGAAA              |
| core_11 | TTTTACTTTGCACCCAACCTGATCTCGAGTTGC                            |
| core_12 | TACCGCGTGACCACTCAGCATCTGTAAGCGGAACGTGGGCTGGCAACGTCAATG       |
| core_13 | TGCAATGAATTTATCAGCAATAAAAAGTCATT                             |
| core_14 | TTTTCTACGGGAAGCTAGAGTAAGGTGTTATC                             |
| core_15 | GATCTCAAGAAGATCCTTTGATCTGTGCACGCTCCCTTCGCTATCCAGCCCAT        |
| core_16 | AAAAAAGTAGTTTTCGCAACGTTTCCGATCG                              |
| core_17 | TTTTTGTTGGCATCGTGGTGTCACTGTGCAA                              |
| core_18 | CGGTGGTTCCAACCCGGAAGCTCCACGTAGAT                             |
| core_19 | TTTTTTAGCTCTTGATCCGGCAGCAGTTTTT                              |
| core_20 | TTTTTGCGACACGGAATGTTAAAAAGGGAATAAGGTTTTT                     |
| core_21 | GCGAGGTATGTAGGCGGCAGGGGGCCTCGCCC                             |
| core_22 | TTTTTCCACTGGTAACAGGACGCCACTGGCAAACGGCTTCATTACGCTCCGGTTTTTTTT |
| core_23 | TTTTTATGATTTAGAAACCATCACCTTTTTT                              |
| core_24 | AAAATAAAAAGGCAATTAGGAAGACTTCCCAATCCTCCCCCTTTTTTT             |
| core_25 | ACCAATAGAAAGAATACCAAACAACTCCCA                               |
| core_26 | GCCGAAATATGGTGGCGAATACACAAGAGGCC                             |
| core_27 | CGGCAAAGTAACTAGGATCTCACCTAGATCCTTTTGTGGAACGCGGTGTAG          |
| core_28 | CGACTATTTAGCAGAAGCCAGTTACCTTCGGAAGAGTTGGTTTTT                |
| core_29 | GGCGAAAATCCCCGAAAACACCACCCCGCCG                              |
| core_30 | CTATTAATTAATATTCCCATTGGTGTAGCG                               |
| core_31 | TGTAGGTAATAAATACTTACTGTGCATGCCATCCGTAAGGGTCTGCATAAATCA       |
| core_32 | GCTCACGCTGGAGACTTGGAAATCCCTCTGCTTACATCCG                     |
| core_33 | TTTTTGGACTATAATAAGGTGATGATTTTTT                              |
| core_34 | TTTTTAAATCAAGTTTTTTGGGGTCTAAAGGGGGCGAACGGAAGCGACCACCCCA      |
| core_35 | CCGTAAAGCGCCACATAGCAGAACCTTTAAAACAAGGATCACTACGTG             |
| core_36 | TAACTAGCTAGCTTAAGGGCGAAGAGTCCAGCTCCAG                        |
| core_37 | TTCTAGAGCATGGCTACGTAGATAGGGTTCCGGAAG                         |

|             |                                                                                                                                                                     |
|-------------|---------------------------------------------------------------------------------------------------------------------------------------------------------------------|
| core_38     | TAAGTAGCCTGTGACTGGTGAGTACTCAACCCCAGCCAGGAGTGTGTTGTTAAA                                                                                                              |
| core_39     | ACCGTAAAAAGGCCGCGTTGCTGTACCTGTCAAGTTAA                                                                                                                              |
| core_40     | CCATAGGCTCCGCCCCGCATATGACCATGGTATTCTTGGCGGGGAAGT                                                                                                                    |
| core_41     | AAAAATCGACGCTCAACCGTCATTGTACTGCC                                                                                                                                    |
| core_42     | TGGCGAAGCGAGTTACATGATCCCCATGTGCTCGTCCCTGGTAAGACAGGGGCGGC                                                                                                            |
| core_43     | CACTAAATCGGAACCCGAGGTGATGGCCCTTACCGC                                                                                                                                |
| core_44     | GGGCTATGTGGGGTTGCGTCAGCAAACACACAGGCGG                                                                                                                               |
| core_45     | CATATATGCGAAAGGCGATGAGTACTCAGACAATGCGATGCAATTTGTCACGCT                                                                                                              |
| core_46     | TTTTTCTGGGCATAATGCACCCGCTCTTTTT                                                                                                                                     |
| core_47     | TTTTTCTTGACGGGAAAGCCAGCCCCGATTTAGAGTTTTT                                                                                                                            |
| core_48     | AGCGGGCGCGCTAAAGTGCCACCTAAAT                                                                                                                                        |
| core_49     | GCTAGGGCACTCCAACACTATTAATCTTGCCCGCGTCAATACGGGAGATGTAAC                                                                                                              |
| core_50     | GTTGTTACTGGAACAATTCCGATCCTGAGAATAGTGTATGCGGCGACGCTCACCG                                                                                                             |
| core_51     | CCCGTGATGATGATCTCCAAGCTGGGCTG                                                                                                                                       |
| core_52     | ATAGCGAGATCTCGACTATCGGAGTTCTAGGACAGTATTTGGTATCTGCGC                                                                                                                 |
| core_53     | TGACTAATCTCGTGCAGCATCACAAGCGGTTAGCTCCTTCGGTCCGTTGCCATGTTCCGAC                                                                                                       |
| core_54     | CTCTGCTTCAGCTCATCAGTGCCGTCGTGTAGATAACTAGAGATTATCAAATGGTCTGA                                                                                                         |
| core_55     | GCCGTTACCGTCGGACTTGTAGGTGGTCTTGAGCAACATATGATTTTTTTGTCAGAAGTAAGTTGGC<br>CGCA                                                                                         |
| core_56     | TTTTTGGTCTGGGTGAAGTCCAAGATAC                                                                                                                                        |
| core_57     | TTTTTCTACGTAGCCATGCTCGCGCCATGCTACTTATTTTTT                                                                                                                          |
| core_58     | CTGCAGGATCTGACGAATGCTTAAATTTTTATACGGGAGGGCCGAGCGCAGAAGT                                                                                                             |
| core_59     | TGTGGAGAGAAAGGCATATATGATCTCAGTTAAACTCA                                                                                                                              |
| core_60     | TTTTTCTGGGTCACGGTCACCTGCAGGGAGGAGTTTTTT                                                                                                                             |
| core_61     | TTTTTGCTGTCTGCCAAGTCCCGAATTTTT                                                                                                                                      |
| core_62     | TGACACCTTCCGCGGTGGCAATAGCCAACCAG                                                                                                                                    |
| core_63     | CCTCATTTCAGCAGCGGGCAAGGGTGCACACCACGCCACGTTGCCTGACAACGG                                                                                                              |
| core_64     | CTCGGAGGAGGCCTCGAACTCCTGTCAAACCCGGGAAGCG                                                                                                                            |
| core_65     | TGGTCCCCTAGGCTGTCCAGGCGAAGGGTGTACATCTTGAGT                                                                                                                          |
| core_66     | TCACCTTGAGCGCCGTGTCCAACCGTTCGTAAGTGTCCACGATGGTGCAATCTTACGGGC                                                                                                        |
| core_67     | GCCCCTGTTATTAGGAAAGGACAGTGGGAGTGTACACG                                                                                                                              |
| core_68     | CAGCCGAGGGCGGACCTACCGTTGTTAAAATTCGCG                                                                                                                                |
| core_69     | CACCACGGCCAGGGTCAAGGCGAGTCTCCT                                                                                                                                      |
| core_70     | AAGGACGAGCAACACAGGCCGAAGGGACGTAGCAGAAGGAGCAACCACCGACAACCGTTGA                                                                                                       |
| core_71     | GCCAAGGAGCAGAGCCGGCAGCATTCTCTG                                                                                                                                      |
| core_72     | TGATCTCGCCCTTCAGATACGGGAAGCAATAGCATGATACAAAGGCAGCTTCAG                                                                                                              |
| core_73     | TGGCCGCCGTCCTTCATTAAGCAGCGTATCCACATAGCGTAAAAGG                                                                                                                      |
| core_74     | CGTCGTAGTGGTCTTCTCTGCATTACGGGGCGGAGCCCTGCCAAAATTACCGGAGCGCTGCCAAGT<br>GGG                                                                                           |
| core_75     | ACCTCAGGATGTACTCCATGTGTTTACGCCGACCGC                                                                                                                                |
| core_76     | TTTTTACTTGTACAGCTCGTTCCAATCCAGGCGGGCCATTTAGTCAGAGGCAGGCGTT                                                                                                          |
| core_77     | TTTTTAGGAGCTGACAGGTGGTGGCAATGCCGAGGGGTGGCGAG                                                                                                                        |
| core_78     | AAGGAACCCCTAGTGATGGAGTTGGCCACTCCCTCT                                                                                                                                |
| core_96     | CAGTTTACCGTAAATACTCCACCCATTGACGTCAATGGAAAGTCCCTATTGGCGTTACTATGGGAACAT<br>ACGTCATTATTGACGTCAATGGGCGGGGTGCGTTGGGCGGTGAGCCAGGCGGGCCATTTACCGTAAG<br>TTATGTAACGCGGAACCTC |
| rec1_1      | GGCTTACCATCTGGCCTGACTCCAGGCACCTATCTCAGCGAT                                                                                                                          |
| rec1_2      | TCCATTAGTTGCCCCAGTGCTTAAATTTTTCCAGTTGACATTTTGAAAAGTC                                                                                                                |
| rec1_3      | ATCAGGGTTATGGGTTCCGAAAACAGGTGTTGAGATCCAGTTC                                                                                                                         |
| rec1_4      | GTTAATTCAAATAGTGTCTCAATACTCTTCTTTTTCAA                                                                                                                              |
| rec1_5      | TATATAGAACCAACTTTAAACCTGTCTTGTAACT                                                                                                                                  |
| rec1_6      | CAGCATGCCTGGAATAGAAGCCTAATAAAGGAAGTCAGGGCG                                                                                                                          |
| rec1_7      | CCCCCACTATTGTTTCTTATCGGGAATTGCG                                                                                                                                     |
| rec2_1      | ATCAATCTAAAGTAAAGTGGATATCCTCCCTCGGGG                                                                                                                                |
| rec2_2      | ATCCGGTAAACTCGTGGGACAGGACTTGGAGC                                                                                                                                    |
| rec2_3      | CTCTCCTTGCTACATGCAAGCAGCAGATTACACTAGATGAAGTGG                                                                                                                       |
| rec2_4      | GGCCAGCAAAATGGCGCTTGTGGCCGGGTCTGACGCTCAAAATT                                                                                                                        |
| rec2_5      | GGCCAGGAACTCATGGTTATGGCAGCACTGCCTATTAATTTCTCATAGTTCGGGCCATGTTGTCA                                                                                                   |
| rec2_6      | CCTATCAGAAACGCAAGAGTCGGCGCCGTTCCGCTTCAATGGGG                                                                                                                        |
| pro1_pass_1 | CAGTACCCTTATGCCTGGACACCTCTCGACAAGCCAGTATGGCTGGCAACTTTTTT                                                                                                            |
| pro1_pass_2 | AGTGCCTCAGCCTCCACGGCACCTTAATTGTAGTGCCAAGCCACAACCTCTCATAAAGAGACAC<br>GTTTTT                                                                                          |
| pro1_pass_3 | ACAAGGAGGAGAAAATGGATTGAGGGCGAGCAGGAAGGAATTTTT                                                                                                                       |
| pro1_pass_4 | TTTTTGGTCCGCTGAAAGCCGGCCGCTTGACGTGCTCACC                                                                                                                            |
| pro1_pass_5 | TTTTTCCGCGCAGAATCTAAGGCACGTTTTT                                                                                                                                     |
| pro1_pass_6 | TTTTTAGAAGGCACAGTCGAGGCAGATCCAGGTGTGATTCCGGATTTAT                                                                                                                   |
| pro1_pass_7 | TTTTTGGGGAGGGGCAAACAACAGTTCTATTGAGACGCGGTAACCAGTTTTTGGTGGACCGAGA                                                                                                    |
| pro2_pass_1 | ACGCGCAGTGCCTTCTGCGCCCGCATCATACACTTGAGTTAAGAATACCAGTTAGTTTTT                                                                                                        |
| pro2_pass_2 | GACGTCAATTTGTAATCCAGAGGTCTCGGCGTTGATGTTCCGGTGGATTTTT                                                                                                                |

|             |                                                                                    |
|-------------|------------------------------------------------------------------------------------|
| pro2_pass_3 | CCACCCTTCGGGGATGTCGGCGGGGACAGCTTTCCCACTTGAAGCCCTTTTT                               |
| pro2_pass_4 | GACGTTGTTAGATGAATCACGCGCCAAGTAGTCCGTCCTTTTT                                        |
| pro2_pass_5 | TTTTGTGGCGGCTGATTGGACCATGCCGAAGTAGGACCCTCGTA                                       |
| pro2_pass_6 | TTTTTCTCGTTGTGGGAGGTGAGGCAGCTGCACAAATTAGGGGGCGTACTTGCCTGACG                        |
| pro2_pass_7 | TTTTTGAAGTTCACTCGCCGTCCACGCCGGGTACCTTCAGCTTGGCTTTTT                                |
| pro2_pass_8 | TTTTTCGGGGAAGGTGCTTCAGCGCAGCTTCGCCCTC                                              |
| pro1_x8_1   | TGATACAAGGGGAGGGGCAAACAACAGTTCTATTGAGACGCGGTAAACCAGTTTTGGTGGACCGAGA                |
| pro1_x8_2   | GGACGTAGGGTCCGCTGAAAGCCGGCCGCGTTGACGTGCTCACC                                       |
| pro1_x8_3   | ATTACTTGCCCGCGCAGAATCTAAGGCACGAGGCATTA                                             |
| pro1_x8_4   | CAGTTACCGTTATGCCTGGACACCTCTCGACAAGCCCAGTATGGCTGGCAACTGGAATTGT                      |
| pro1_x8_5   | AACACCACAGAAGGCACAGTCGAGGCAGATCCAGGTGTGATTTCCGGATTTAT                              |
| pro1_x8_6   | AGTGCCTCACGCCTCCACGGCACCTTAATTGTCAGTGCCCAAGCCACAACCTCCTCATAAAGAGACAC<br>GTTACAGCTC |
| pro1_x8_7   | ACAAGGAGGAGAAAATGGATTGAGGGCGAGCAGGAAGGAACAGAAGGA                                   |
| pro2_x8_1   | GACGTCAATTTGTAATCCAGAGGTCCTCGGCGTTGATGTTCCGGTGGAAACCCTAA                           |
| pro2_x8_2   | CTCATTTCGGGGAAGGTGCTTCAGCGCAGCTTCGCCCTC                                            |
| pro2_x8_3   | GACGTTGTTAGATGAATCACGCGCCAAGTAGTCCGTCCTCAAAGCGAA                                   |
| pro2_x8_4   | AAGGGAAGGAAGTTCACCTCGCCGTCCACGCCGGGTACCTTCAGCTTGGCTTTTT                            |
| pro2_x8_5   | ACGCGCAGTGCGCCTTCTGCCGCCCGCATCATACACTTGAGTTAAGAATACCAGTTAGCTCGAAGA                 |
| pro2_x8_6   | AGGCAGATTCTCGTTGTGGGAGGTGAGGCAGCTGCACAAATTAGGGGGCGTACTTGCCTGACG                    |
| pro2_x8_7   | TAAATCGGGTGGCGGCTGATTGGACCATGCCGAAGTAGGACCCTCGTA                                   |
| pro2_x8_8   | CCACCCTTCGGGGATGTCGGCGGGGACAGCTTTCCCACTTGAAGCCCTATTAGGAA                           |
| pro1_x5_1   | TACAAGGGGAGGGGCAAACAACAGTTCTATTGAGACGCGGTAAACCAGTTTTGGTGGACCGAGA                   |
| pro1_x5_2   | CGTAGGGTCCGCTGAAAGCCGGCCGCGTTGACGTGCTCACC                                          |
| pro1_x5_3   | ACTTGCCCGCGCAGAATCTAAGGCACGAGGCA                                                   |
| pro1_x5_4   | CAGTTACCGTTATGCCTGGACACCTCTCGACAAGCCCAGTATGGCTGGCAACTGGAAT                         |
| pro1_x5_5   | ACCACAGAAGGCACAGTCGAGGCAGATCCAGGTGTGATTTCCGGATTTAT                                 |
| pro1_x5_6   | AGTGCCTCACGCCTCCACGGCACCTTAATTGTCAGTGCCCAAGCCACAACCTCCTCATAAAGAGACAC<br>GTTACAG    |
| pro1_x5_7   | ACAAGGAGGAGAAAATGGATTGAGGGCGAGCAGGAAGGAACAGAA                                      |
| pro2_x5_1   | GACGTCAATTTGTAATCCAGAGGTCCTCGGCGTTGATGTTCCGGTGGAAACCC                              |
| pro2_x5_2   | ATTTTCGGGGAAGGTGCTTCAGCGCAGCTTCGCCCTC                                              |
| pro2_x5_3   | GACGTTGTTAGATGAATCACGCGCCAAGTAGTCCGTCCTCAAAGC                                      |
| pro2_x5_4   | GGAAGGAAGTTCACCTCGCCGTCCACGCCGGGTACCTTCAGCTTGGCTTTTT                               |
| pro2_x5_5   | ACGCGCAGTGCGCCTTCTGCCGCCCGCATCATACACTTGAGTTAAGAATACCAGTTAGCTCGA                    |
| pro2_x5_6   | CAGATTCTCGTTGTGGGAGGTGAGGCAGCTGCACAAATTAGGGGGCGTACTTGCCTGACG                       |
| pro2_x5_7   | ATCGGGTGGCGGCTGATTGGACCATGCCGAAGTAGGACCCTCGTA                                      |
| pro2_x5_8   | CCACCCTTCGGGGATGTCGGCGGGGACAGCTTTCCCACTTGAAGCCCTATTAG                              |
